# Supplementary material for: Impact of non-pharmaceutical interventions for reducing transmission of COVID-19: a systematic review and meta-analysis protocol
Source: PubMed Central journal article supplement — BMJ Open. 2020 Oct 22;10(10):e041383. doi: 10.1136/bmjopen-2020-041383 (PMC7582337; doi:10.1136/bmjopen-2020-041383), 2020-10-22
Supplement: bmjopen-2020-041383.draft_revisions.pdf [file bmjopen-2020-041383.draft_revisions.pdf]

# BMJ Open

BMJ Open is committed to open peer review. As part of this commitment we make the peer review history of every article we publish publicly available.

When an article is published we post the peer reviewers' comments and the authors' responses online. We also post the versions of the paper that were used during peer review. These are the versions that the peer review comments apply to.

The versions of the paper that follow are the versions that were submitted during the peer review process. They are not the versions of record or the final published versions. They should not be cited or distributed as the published version of this manuscript.

BMJ Open is an open access journal and the full, final, typeset and author-corrected version of record of the manuscript is available on our site with no access controls, subscription charges or pay-per-view fees (<http://bmjopen.bmj.com>).

If you have any questions on BMJ Open's open peer review process please email [info.bmjopen@bmj.com](mailto:info.bmjopen@bmj.com)

# BMJ Open

## Impact of social distancing measures for preventing coronavirus disease 2019 [COVID-19]: A systematic review and meta-analysis protocol

|                               |                                                                                                                                                                                                                                                |
|-------------------------------|------------------------------------------------------------------------------------------------------------------------------------------------------------------------------------------------------------------------------------------------|
| Journal:                      | <i>BMJ Open</i>                                                                                                                                                                                                                                |
| Manuscript ID                 | bmjopen-2020-041383                                                                                                                                                                                                                            |
| Article Type:                 | Protocol                                                                                                                                                                                                                                       |
| Date Submitted by the Author: | 06-Jun-2020                                                                                                                                                                                                                                    |
| Complete List of Authors:     | Regmi, Krishna; University of Bedfordshire, Institute for Health Research, Faculty of Health and Social Sciences ; University of Dundee School of Medicine, Centre for Medical Education<br>Lwin, Cho ; University of Dental Medicine Mandalay |
| Keywords:                     | Infection control < INFECTIOUS DISEASES, Public health < INFECTIOUS DISEASES, EPIDEMIOLOGY, INFECTIOUS DISEASES                                                                                                                                |
|                               |                                                                                                                                                                                                                                                |

SCHOLARONE™  
Manuscripts

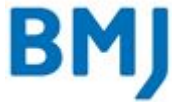

I, the Submitting Author has the right to grant and does grant on behalf of all authors of the Work (as defined in the below author licence), an exclusive licence and/or a non-exclusive licence for contributions from authors who are: i) UK Crown employees; ii) where BMJ has agreed a CC-BY licence shall apply, and/or iii) in accordance with the terms applicable for US Federal Government officers or employees acting as part of their official duties; on a worldwide, perpetual, irrevocable, royalty-free basis to BMJ Publishing Group Ltd ("BMJ") its licensees and where the relevant Journal is co-owned by BMJ to the co-owners of the Journal, to publish the Work in this journal and any other BMJ products and to exploit all rights, as set out in our [licence](#).

The Submitting Author accepts and understands that any supply made under these terms is made by BMJ to the Submitting Author unless you are acting as an employee on behalf of your employer or a postgraduate student of an affiliated institution which is paying any applicable article publishing charge ("APC") for Open Access articles. Where the Submitting Author wishes to make the Work available on an Open Access basis (and intends to pay the relevant APC), the terms of reuse of such Open Access shall be governed by a Creative Commons licence – details of these licences and which [Creative Commons](#) licence will apply to this Work are set out in our licence referred to above.

Other than as permitted in any relevant BMJ Author's Self Archiving Policies, I confirm this Work has not been accepted for publication elsewhere, is not being considered for publication elsewhere and does not duplicate material already published. I confirm all authors consent to publication of this Work and authorise the granting of this licence.

1  
2  
3 **Impact of social distancing measures for preventing coronavirus disease 2019 [COVID-**  
4 **19]: A systematic review and meta-analysis protocol**  
5  
6  
7  
8  
9  
10  
11  
12  
13  
14  
15  
16

17 Krishna Regmi<sup>1,2</sup>, and Cho Mar Lwin<sup>3</sup>  
18  
19

20 <sup>1</sup>Institute for Health Research, University of Bedfordshire, Luton, LU2 8LE, United  
21 Kingdom.  
22  
23

24 <sup>2</sup>School of Medicine, University of Dundee, Dundee, DD2 4BF, United Kingdom.  
25

26 E-mail: [Krishna.r.regmi@gmail.com](mailto:Krishna.r.regmi@gmail.com)  
27

28 <sup>3</sup>University of Medicine Mandalay, Chan Aye Thar Zan, Mandalay, 05024, Myanmar.  
29

30 Email: [chomarlwindr@gmail.com](mailto:chomarlwindr@gmail.com)  
31  
32  
33  
34  
35

36 **Corresponding author**  
37

38 Krishna Regmi, [Krishna.r.regmi@gmail.com](mailto:Krishna.r.regmi@gmail.com)  
39  
40  
41  
42

43 **Keywords:** Social distancing, COVID-19, Prevention, Control, Systematic review  
44  
45  
46  
47  
48  
49  
50  
51  
52  
53  
54  
55  
56  
57  
58  
59  
60

## Impact of social distancing measures for preventing coronavirus disease 2019 [COVID-19]: A systematic review and meta-analysis protocol

### Abstract

**Introduction:** Social distancing measures (SDMs) protect public health from the outbreak of coronavirus disease 2019 (COVID-19). However, the impact of SDMs has been inconsistent and unclear. This study aims to assess the effects of SDMs (e.g. isolation, quarantine) for reducing the transmission of COVID-19.

**Methods and analysis:** We will conduct a systematic review meta-analysis research of both randomised controlled trials and non-randomised controlled trials. We will search MEDLINE, EMBASE, Allied & Complementary Medicine, COVID-19 Research and WHO database on COVID-19 for primary studies assessing the enablers and barriers associated with SDMs, and will be reported in accordance with PRISMA statement. The PRISMA-P checklist will be used while preparing this protocol. We will use Joanna Briggs Institute guidelines (JBI Critical Appraisal Checklists) to assess the methodological qualities and synthesised performing thematic analysis. Two reviewers will independently screen the papers and extracted data. If sufficient data are available, the random-effects model for meta-analysis will be performed to measure the effect size of SDMs or the strengths of relationships. To assess the heterogeneity of effects,  $I^2$  together with the observed effects (Q-value, with degrees of freedom) will be used to provide the true effects in the analysis.

**Ethics and dissemination:** Ethics approval and consent will not be required for this systematic review of the literature as it does not involve human participation. We will be able to disseminate the study findings using the following strategies: we will be publishing at least one paper in peer-reviewed journals, and an abstract will be presented at suitable national/international conferences or workshops. We will also share important information with public health authorities as well as with the World Health Organization. In addition, we may post the submitted manuscript under review to bioRxiv, medRxiv, or other relevant pre-print servers.

### Strengths and limitations of this study

- To our knowledge, this study will be the first systematic review to examine the factors impacting SDMs to reduce transmission of COVID-19.
- This study will offer highest level of evidence for informed decisions, drawing a broader framework.
- This protocol reduces the possibility of duplication, provides transparency to the methods and procedures that will be used, minimise potential biases and allows peer-review.
- This research is not externally funded, and therefore time and resource will be constrained.
- If included studies will be variable in sample size, quality and population, which may open to bias, and the heterogeneity of data will preclude a meaningful meta-analysis to measure the impact of specific SDMs

### Introduction

Coronavirus disease 2019 (COVID-19; caused by severe acute respiratory syndrome coronavirus 2 [SARS-CoV-2]), emerged in Wuhan, China in December 2019, has been the biggest challenge for us in our lifetime posing a global public health threat. At the time of writing (1/6/20) WHO COVID-19 Situation Dashboard reported that this virus has already affected 216 countries with approximately 5,939,234 confirmed cases and 367,255 confirmed deaths; a fatality rate of approximately 6.18%, i.e. more than six deaths in every 100 confirmed cases. The highest number of confirmed cases were reported in the Americas (2,743,793) followed by Europe (2,142,547), Eastern Mediterranean (504,001) and South-East Asia (264, 015), whereas Western Pacific and Africa reported relatively low cases i.e. 182, 527 and 100,610 respectively.<sup>1</sup> In Europe, the UK has become the ‘epicentre’ of the pandemic.

Based on reported cases and deaths, this disease is portrayed as a great equaliser, but 1:10 reported infections were among health professionals, e.g. medical doctors, nurses and other healthcare professionals. Evidence further indicates that in England, Black, Asian and Minority Ethnic (BAME) groups recorded higher mortality, ranging from 1.5 (in Asian) to 7.3 (in Black Caribbean population) times compared to white individuals.<sup>2</sup> Similarly, COVID-19 mortality rate in the US for African Americans was 2.4-2.7 times more than white individuals. However, deaths are not consistent across these groups. Several factors could be

1  
2  
3 considered, e.g. ethnicity, age, sex, co-morbidities (diabetes, renal conditions), occupation,  
4 socioeconomic status, multifamily and multigenerational households.<sup>2-4</sup>

5  
6 Similarly, it is difficult to predict an exact future, but recent data from Johns Hopkins  
7 University reported that global COVID-19 deaths have surpassed over 370,000 worldwide.<sup>5</sup>  
8 Imperial College London highlights that this outbreak could kill 40 million people this year  
9 without public health measures (e.g. case finding, contact tracing and testing, and strict  
10 quarantine).<sup>6</sup> Evidence suggests that the number of cases reported would possibly “represent  
11 an underestimation of the true burden due to lack of surveillance and diagnostic capacity”<sup>7</sup> as  
12 well as pharmaceuticals to manage severe COVID-19.<sup>8</sup>

13  
14 Several countries, including the UK, USA and other EU countries are adopting SDMs  
15 as a form of non-pharmaceutical or physical intervention. Social distancing is defined as a  
16 measure to ban large gatherings and advise individuals not to socialize outside their  
17 households by closing borders, some public places, schools and universities;  
18 isolation/quarantine, physical distancing and room separation to isolate symptomatic  
19 individuals and their contacts; and large-scale lockdowns of populations by staying at least  
20 2m apart aiming to minimize mixing of infectious patients with susceptibles.<sup>8</sup> WHO  
21 recommends case finding, testing, isolation, contact tracing and quarantine of close contacts.<sup>9</sup>

22  
23 A preliminary scan of the literature demonstrated some research on COVID-19 from  
24 China, South Korea, UK, USA and other countries, but these are very limited systemically  
25 reviewed or synthesised. Several rapid reviews and summaries have been covered on  
26 COVID-19 epidemiology,<sup>10,11</sup> the effectiveness of real-time PCR for diagnosis,<sup>12</sup> effects of  
27 school closure,<sup>13</sup> quarantine,<sup>14,15</sup> social distancing<sup>16</sup> (whose study was primarily based on two  
28 previous reviews<sup>17,18</sup> on influenza conducted in 2012 and 2018, respectively), and  
29 mathematical modelling studies incorporating the effect of social distancing.<sup>8,19-27</sup> These  
30 models would generally help to “predict epidemic curve representing the number of  
31 infections caused by the virus over time.”<sup>28</sup>

32  
33 Recently, few systematic review and meta-analysis conducted to investigate the  
34 optimum distance for avoiding transmissions and ethnicity and clinical outcomes.<sup>4,29</sup>  
35 Cochrane further conducted three studies. First, a rapid review in 2020, involving 29 studies  
36 on COVID-19, SARS, MERS plus other viruses from China, UK, South Korea and Japan.<sup>30</sup>  
37 Second, a rapid qualitative evidence synthesis conducted in 2020 capturing 36 studies from  
38 Asia, Africa, Central and North America and Australia examined healthcare workers’  
39 adherence and enablers or challenges associated with infection control guidelines for  
40 respiratory infections. Another study examined 67 studies including RCTs and observational  
41  
42  
43  
44  
45  
46  
47  
48  
49  
50  
51  
52  
53  
54  
55  
56  
57  
58  
59  
60

1  
2  
3 studies exploring the role of physical interventions for reducing the spread of respiratory  
4 viruses, and found no evidence regarding screening at entry ports and social distancing.<sup>31</sup>  
5

6 Lewnard and Lo<sup>7</sup> and Michigan Medicine Projections<sup>32</sup> reported that combined SDMs  
7 or interventions using social isolation, quarantine, school closure, and workplace distancing  
8 appeared effective in reducing COVID-19 compared to no interventions at all. This approach,  
9 however, reported considerable challenges, e.g. societal disruption, social isolation/rejection,  
10 mental stress and psychological trauma, lack of tests and testing facilities, poor contact  
11 tracing, lack of surveillance. None of these studies examined the SDMs factors in reducing  
12 the transmission of COVID-19 systematically. We proposed a systematic review  
13 to assess the effects of SDMs (e.g. isolation, quarantine) for reducing the transmission of  
14 COVID-19.  
15  
16  
17  
18  
19  
20  
21  
22  
23

### 24 **Review question**

25 What has been the impact of social distancing measures for preventing coronavirus disease  
26 2019 [COVID-19]?  
27  
28  
29  
30

### 31 **Methods and designs**

32 This study will utilise a systematic review (SR), which will consider both randomised  
33 controlled trials and non-randomised trials (prospective and retrospective observational  
34 studies) of good-quality studies. SR is a research method that reviews relevant research  
35 literature, using systematic and explicit, accountable methods, to answer a specific research  
36 question objective.<sup>33</sup> Meta-analysis includes the statistical analysis for combining the results  
37 of a number of individual studies to produce summary results, e.g. pooled research studies.<sup>34</sup>  
38 The Preferred Reporting Items for Systematic Reviews and Meta-Analysis Protocols  
39 (PRISMA-P) checklist has been used in the preparation of this protocol.<sup>35</sup>  
40  
41  
42  
43  
44  
45  
46  
47

### 48 **Criteria for considering studies for review**

#### 49 Inclusion criteria

- 51 1. Primary research describing SDMs, e.g. social distance, isolation and quarantine  
52 across all age groups.  
53
- 54 2. Research reporting different factors and SDMs or social distancing interventions, e.g.,  
55 social distance by avoiding crowds and restricting movement, isolating ill people and  
56 quarantine of exposed people (as a secondary outcome) and reducing transmission of  
57  
58  
59  
60



1  
2  
3 COVID-19 trend (as a primary outcome). Additional outcomes include – anxiety,  
4  
5  
6  
7  
8  
9  
10  
11  
12  
13  
14  
15  
16  
17  
18  
19  
20  
21  
22  
23  
24  
25  
26  
27  
28  
29  
30  
31  
32  
33  
34  
35  
36  
37  
38  
39  
40  
41  
42  
43  
44  
45  
46  
47  
48  
49  
50  
51  
52  
53  
54  
55  
56  
57  
58  
59  
60

COVID-19 trend (as a primary outcome). Additional outcomes include – anxiety, depressions, physical and psychological distress,

3. Published peer-reviewed article using randomised controlled trials and non-randomised controlled trials
4. Articles published in English language regardless of the location (or settings) of the studies, up to May 2020.

[We proposed to collect data from July/August until October 2020 for the study]

#### Exclusion criteria

1. Articles published in narrative reviews, modelling studies, opinion pieces, letters, news, editorials, perspectives, commentaries and any other publications lacking primary data, including grey literatures.
2. Studies deemed to have overall low quality.

#### Search strategy to identify relevant studies

Five major databases will be searched: MEDLINE, EMBASE, Allied & Complementary Medicine, COVID-19 Research and WHO database on COVID-19. The literature search use the following terms: “social distancing measures”, “social distancing”, “quarantine”, “patient isolation” combined with "COVID-19". Primary search terms are SDMs (all synonyms) and COVID-19 (all synonyms) using ‘Textword searching’ – searching for a word or phrase appearing anywhere in the document, where the document is the citation (article title, journal name, author), not the full text of an article, and ‘Thesaurus (MeSH, EMTREE) searching’, employing Boolean operators and truncations. To maximise sensitivity, a broad search strategy will be designed as shown in table 1. The ‘Related Articles’ feature in PubMed will be consulted. Searches will also be supplemented by reviewing the reference lists (‘references of references’) of selected articles to find any other relevant papers. We will also ask subject experts/information specialists from authors’ Universities to verify the research strategy, ensuring its comprehensiveness.

**Table 1.** Search strategy for the MEDLINE

| Search | Search terms will be modified as needed for use in other databases     |
|--------|------------------------------------------------------------------------|
| #1     | social distancing                                                      |
| #2     | social distance                                                        |
| #3     | distancing                                                             |
| #4     | isolation                                                              |
| #5     | patient isolation                                                      |
| #6     | patient isolators                                                      |
| #7     | physical contact                                                       |
| #8     | physical distancing                                                    |
| #9     | quarantine                                                             |
| #10    | quarantined                                                            |
| #11    | #1 OR #2 OR #3 OR #4 OR#5 OR #6 OR #7 OR #8 OR#9 OR #10                |
| #12    | COVID-19                                                               |
| #13    | 2019 ncov                                                              |
| #14    | 2019-nCoV                                                              |
| #15    | 2019 novel coronavirus                                                 |
| #16    | betacoronavirus                                                        |
| #17    | Wuhan coronavirus                                                      |
| #18    | coronavirus infections                                                 |
| #19    | covid 19 pandemic                                                      |
| #20    | sars cov 2                                                             |
| #21    | SARS-CoV-2                                                             |
| #22    | sars virus                                                             |
| #23    | #12 OR #13 OR #14 OR #15 OR#16 OR #17 OR #18 OR #19 OR#20 OR #21 OR#22 |
| #24    | clinical trials                                                        |
| #25    | cross-sectional studies                                                |
| #26    | Survey                                                                 |
| #27    | epidemiologic studies                                                  |
| #28    | Quantitative research                                                  |
| #29    | #24 OR #25 OR #26 OR #27 OR#28                                         |

### Selection of studies

The citations identified through the searches will be imported into Mendeley Reference Manager (<https://www.mendeley.com/>). All studies emerging from the databases will be screened twice: i) screening of screening of titles, abstracts with two reviewer against minimum inclusion criteria, and ii) review of full text. We will use the standard PRISMA flow diagram to provide the process of study selection (figure 2).<sup>36</sup>

**Figure 1.** PRISMA flow diagram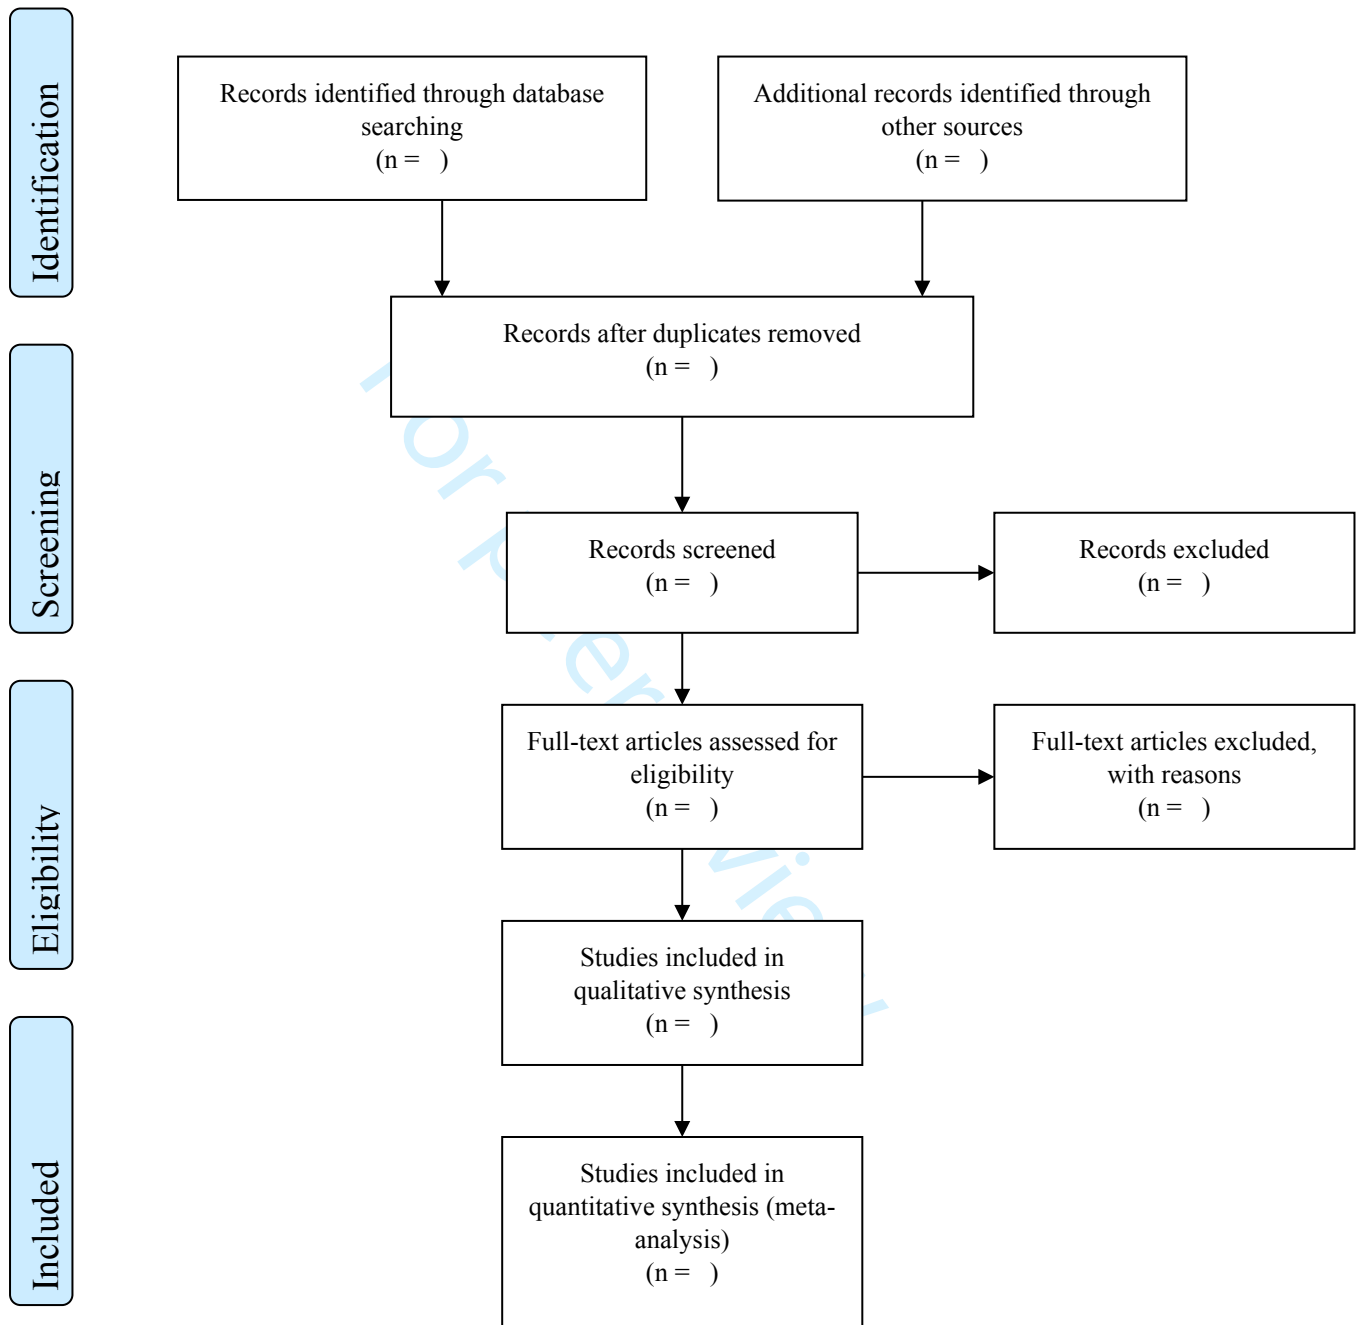

### Quality appraisal of included studies

Joanna Briggs Institute (JBI) critical appraisal checklists for randomised controlled trials and non-randomised controlled trials will use to assess the methodological qualities<sup>37</sup> (Box 1).

All included studies will assess by two reviewers (KR, CML) using the standardised questions 4-item checklists i.e. Yes, No, Unclear and Not Applicable and the results will use to inform synthesis and interpretation of the findings. To facilitate comparison of appraisal

processes, all reviewers will record the rationale for inclusion or exclusion, and discrepancies will discuss and resolve by consensus.

### **Box 1. Critical appraisal checklist**

JBI Critical Appraisal Checklists for randomized controlled trials and non-randomized experimental studies to appraise the retrieved studies with respect to the possibility of biases in their designs, conduct and analysis<sup>37</sup>. The results will be provided in Table 2, with number 1-13 (for Randomised control trials and 1-9 (for Non-randomised studies) representing satisfactory fulfilment of the corresponding criteria.

#### *Randomised control trials*

- 1) Was true randomization used for assignment of participants to treatment groups?
- 2) Was allocation to treatment groups concealed?
- 3) Were treatment groups similar at the baseline?
- 4) Were participants blind to treatment assignment?
- 5) Were those delivering treatment blind to treatment assignment?
- 6) Were outcomes assessors blind to treatment assignment?
- 7) Were treatment groups treated identically other than the intervention of interest?
- 8) Was follow up complete and if not, were differences between groups in terms of their follow up adequately described and analyzed?
- 9) Were participants analyzed in the groups to which they were randomized?
- 10) Were outcomes measured in the same way for treatment groups?
- 11) Were outcomes measured in a reliable way?
- 12) Was appropriate statistical analysis used?
- 13) Was the trial design appropriate, and any deviations from the standard RCT design (individual randomization, parallel groups) accounted for in the conduct and analysis of the trial?

#### *Non-randomised studies*

- 1) Is it clear in the study what is the 'cause' and what is the 'effect' (i.e. there is no confusion about which variable comes first)?
- 2) Were the participants included in any comparisons similar?
- 3) Were the participants included in any comparisons receiving similar treatment/care, other than the exposure or intervention of interest?
- 4) Was there a control group?
- 5) Were there multiple measurements of the outcome both pre and post the intervention/exposure?
- 6) Was follow up complete and if not, were differences between groups in terms of their follow up adequately described and analyzed?
- 7) Were the outcomes of participants included in any comparisons measured in the same way?
- 8) Were outcomes measured in a reliable way?
- 9) Was appropriate statistical analysis used?

### Assessment of reporting biases

Publication bias, often called reporting bias and dissemination bias, refers to the concern that studies which report relatively large effects are more likely to be published as compared to studies reporting smaller effects.<sup>38</sup> Similarly, published studies that include multiple outcomes would be more likely to report the outcomes than if they showed statistically significant results.<sup>39</sup> One approach to address the publication bias is to follow the Trim and Fill procedures, i.e. assessing asymmetry or symmetry in the Funnel plot if more than 10 eligible studies are identified. This approach would estimate the extent of bias or estimate of the adjusted effect size.<sup>40</sup> We will use this approach while assessing the publication bias in the included studies, but Borenstein<sup>38(p.165)</sup> warns that the presence of bias will not automatically invalidate the results.

### Data analysis and synthesis

A narrative synthesis, using thematic analysis, will be conducted for the included studies. We will also provide a descriptive numerical summary. We will use risk ratios (RRs), mean differences (MD), or standardised mean differences (SMD, where applicable, will be used for the dichotomous and continuous outcomes respectively.<sup>38</sup>

If sufficient data are available, i.e. identical on important factors and addressing the same fundamental question, to make an inference to a universe of comparable studies, the random-effects model for meta-analysis will be employed for the analysis to measure the effect size of SDMs or the strengths of relationships using the software Comprehensive Meta-Analysis (CMA, version 3. [https://www.meta-analysis.com/pages/new\\_v3.php?cart=BT2P4569026](https://www.meta-analysis.com/pages/new_v3.php?cart=BT2P4569026)). The purpose of using a random-effects model in the analysis is “to incorporate the assumption that the different studies are estimating different, yet related, intervention effects”.<sup>41</sup> To assess the heterogeneity of effects,  $I^2$  together with the observed effects (Q-value, with degrees of freedom) will be used to provide the true effects in the analysis. Q-value is the sum of the squared deviations of all effect sizes from the mean effect size. Generally, this value is on a standardised scale, so that a large deviation gets more weight if the estimate is precise, and less weight if the estimate is imprecise.<sup>42</sup> In fact,  $I^2$  statistics does not tell us how much heterogeneity there is, but it tells what proportion of the observed variance reflects in true effect sizes rather than the sampling error. As such, it provides some context for understanding the forest plot.<sup>43</sup> If  $I^2$  statistics is low (near zero), then most of the variable in the forest plot is due to sampling error. Conversely, if  $I^2$  statistics is very high (say, more than 75%) then most of the variance in the

forest plot is due to variance in true effects. If we could somehow plot the variance of true effects, most of the variance would remain.<sup>41</sup>

### Tabulating the included studies

Data from eligible studies will be extracted independently by two reviewers based on the summary of review studies (Table 2). As Rodgers and colleagues confirm, this would not only improve the process of transparency by better understanding what sorts of data extracted from which studies, but also recognising the contribution made by each study to the overall synthesis.<sup>44</sup> In addition, such tables will demonstrate how the individual study area contributes to the reviewers' final conclusion.

**Table 2.** Summary of reviewed studies

| Study | Aims/study question | Country | Design/method(s) | Number of subjects (sample size) | Critical appraisal checklists* | Reviewer comments |
|-------|---------------------|---------|------------------|----------------------------------|--------------------------------|-------------------|
|       |                     |         |                  |                                  |                                |                   |
|       |                     |         |                  |                                  |                                |                   |
|       |                     |         |                  |                                  |                                |                   |

\*Numbers in this column signify the quality criteria from Box 1 that studies were deemed to have met.

### Dealing with missing data

In the case of missing data that might be important to summarise/synthesise the findings of the study or details of the studies are unclear, corresponding authors of included studies will be contacted.

### Sub-group analysis

An a priori sub-group analysis will be planned, if data available, for:

- (a) social distancing;
- (b) isolation; and
- (c) quarantine.

### Risk of bias

Risk of bias will be examined, as it provides the variation, e.g. heterogeneity in the results of the studies included in the study. As Higgins et al.<sup>41</sup> argue, rigorously conducted studies in the systematic review would provide more truthful results, and the results from the studies of variable validity would give either false negative or false positive conclusions. Therefore,

1  
2  
3 assessing the risk of bias in all studies in any review is important. In assessing risk, we will  
4 create a table with a row for every relevant type of potential bias, and then classify each study  
5 on each row as having a low, unclear, or high risk of bias. In this study, the issue of bias will  
6 be kept separate from the core analysis – meaning analysis will be performed without  
7 worrying about the quality/bias. We will then use the risk of bias table to provide the context  
8 for the analysis.<sup>38</sup> As Borenstein<sup>38(p.326)</sup> suggests, “if the analysis shows a clinically and/or  
9 substantially important effect, we will assess the entirety of the evidence by considering the  
10 risk of bias as well.” Generally, the bias table provides the type of bias (e.g., selective  
11 reporting of outcomes, random sequence generation, allocation of concealment, blinding of  
12 participants, personnel and assessors, incomplete outcome data and other potential threats to  
13 validity) in each study. If, for example, most rows are unshaded then that it is considered a  
14 low risk of bias, whereas if some (or all) rows are either partly shaded or dark (risk of bias  
15 will be either unclear or high), this would provide relatively less confidence in the  
16 results.<sup>41</sup> We will use both RoB 2 tool<sup>45</sup> for randomised and ROBINS-I tool<sup>46</sup> for non-  
17 randomised trials while assessing the risk of bias.

### 30 **Patient and public involvement**

31 As this is a protocol for a systematic review and meta-analysis, neither patients nor public  
32 participation will be directly involved, and ethics approval and consent will not be required  
33 either.

### 38 **Dissemination**

39 We will be able to disseminate the study findings using the following strategies: we will be  
40 publishing at least one paper in peer-reviewed journals, and an abstract will be presented at  
41 suitable national/international conferences or workshops. We will also share important  
42 information with public health authorities as well as with the World Health Organization. In  
43 addition, we may post the submitted manuscript under review to bioRxiv, medRxiv, or other  
44 relevant pre-print servers.

### 52 **Discussion**

53 To our knowledge, this study will be the first systematic review to examine the effects of  
54 SDMs (e.g. isolation, quarantine) for reducing the transmission of COVID-19.  
55 enablers and barriers impacting SDMs to reduce transmission of COVID-19. Social  
56 distancing becomes a highly charged topic creating a lieu of debate among the politicians,  
57  
58  
59  
60



1  
2  
3 economists, medical and public health professions. The likelihood is that COVID-19 will  
4 become endemic, which suggests long-term behavioural adjustments.<sup>47</sup> Similarly, we argued  
5 that social distancing is not part of the culture in either developed or developing countries, for  
6 different reasons.<sup>48</sup> In developing countries, it is more related to population density,  
7 crowding, workplace conditions etc., such as overcrowding in public transport. In developed  
8 countries such as Switzerland, people were still following Swiss kiss as late as 20 March,  
9 when COVID-19 was already peaking. Similarly, some evidence shows some relationships  
10 between social distancing and economic aspects: poverty, living in slums etc. in developing  
11 countries; marginalized populations in developed countries. A similar issue has also been  
12 reported in the previous study.<sup>49</sup> Therefore, there is a need to completely change the way the  
13 economy, businesses, and life are organised to protect the vulnerable groups such as  
14 homeless, disabled, undocumented migrant workers and inmates. Similarly, home life should  
15 be looked at, as evidence suggests we need to change the way we interact at home, for  
16 example, with vulnerable family members – elderly, pregnant, immunocompromised due to  
17 chronic disease or protracted illnesses, at least until the pandemic is over, e.g. curbing the  
18 possibility of transferring the disease to the elderly. A recent descriptive review of data on  
19 disparities in the risk and outcomes from COVID19 in the UK has reported that:

20  
21  
22 “The largest disparity found was by age. Among people already diagnosed with  
23 COVID19, people who were 80 or older were seventy times more likely to die than  
24 those under 40. Risk of dying among those diagnosed with COVID-19 was also  
25 higher in males than females; higher in those living in the more deprived areas than  
26 those living in the least deprived; and higher in those in Black, Asian and Minority  
27 Ethnic (BAME) groups than in White ethnic groups”<sup>3</sup>

28  
29  
30 Marmot et al.<sup>50(p.13)</sup> also argued that: “There are clear socioeconomic gradients in  
31 preventable mortality. The poorest areas have the highest preventable mortality rates and the  
32 richest areas have the lowest.” We argue that public health has failed to convince politicians  
33 to take rapid action on prevention of spread or prepare for necessary treatment arrangements.  
34 Several authors reported that the “structure and capacity of our depleted healthcare system  
35 are now largely driving the response to this epidemic” and most likely “it will continue to do  
36 so until services that support local communicable disease control are rebuilt and  
37 reintegrated.”<sup>51,52</sup>

38  
39  
40 The potential limitations of this study would be that if the retrieved studies would be  
41 variable in sample size, quality and population, which may open to bias, and the  
42  
43  
44  
45  
46  
47  
48  
49  
50  
51  
52  
53  
54  
55  
56  
57  
58  
59  
60



1  
2  
3 heterogeneity of data precludes a meaningful meta-analysis to measure the impact of specific  
4 SDMs for COVID-19, therefore the findings might warrant generalisation. Second,  
5 methodologies might be poorly reported (mostly due to preprints - postings in MedRxiv),  
6 lacking comprehensive strategies for sampling and procedures, and lacking detail in data  
7 gathering and analysis. Wolkewitz and Puljak<sup>53</sup> warned that: “there are many methodological  
8 challenges related to producing, gathering, analysing, reporting and publishing data in  
9 condensed timelines required during a pandemic.” Third, searching "social distancing" in  
10 different databases might be challenging mainly due to rapidly-growing COVID-19 studies in  
11 PubMed and other search interfaces, which are not visible in the major search databases  
12 (PubMed, EMBASE) due to i) indexing, and ii) often bibliographic databases failed to  
13 capture preprint and unpublished studies including registered clinical trials,<sup>54,55</sup> and the  
14 majority are commentaries, news, perspectives or opinions.<sup>53</sup> Finally, this research is not  
15 externally funded, and therefore time and resource will be constrained.

16  
17 Nevertheless, this study will add to the literature on highlighting the major enablers  
18 and barriers of SDM in controlling COVID-19 in public health policy and interventions: i)  
19 given the fact that there is no vaccine or treatment available at the time of writing, and ii)  
20 there have been limited robust published studies of SDM success factors, with most studies  
21 exploring the process rather than hard or tangible outcomes. In addition, this review will  
22 provide a basis for developing the best methods and approaches in terms of developing  
23 objective measures and interventions to establish the link between different factors and SDMs  
24 (as a secondary outcome) and reducing transmission of COVID-19 trend (as a primary  
25 outcome) effectively, efficiently and equitably.

### 42 **Contributors**

43 KR conceived and designed the research with the advice from CML; KR wrote the first draft;  
44 KR and CML reviewed and contributed to drafting, revising and finalising the manuscript.  
45 All authors have reviewed and approved the final version of the manuscript and have given  
46 their permission for publication.

### 52 **Funding statement**

53 The authors received no financial support for this research study.

### 57 **Competing interests**

58 The authors declare that they have no competing interests.

### Patient consent for publication

Not required

### Author affiliations

<sup>1</sup>Institute for Health Research, University of Bedfordshire, United Kingdom. <sup>2</sup>School of Medicine, University of Dundee, United Kingdom. <sup>3</sup>University of Medicine Mandalay, Myanmar

### References

1. World Health Organisation. Coronavirus disease (COVID-19) pandemic. Published 2020. Accessed May 28, 2020. <https://www.who.int/emergencies/diseases/novel-coronavirus-2019>
2. Razaq A, Harrison D, Karunanithi S, Barr B, Asaria M, Khunti K. BAME COVID-19 deaths-what do we know? Rapid data & evidence review: “hidden in plain sight.” Published 2020. Accessed May 28, 2020. <https://www.cebm.net/wp-content/uploads/2020/05/BAME-COVID-Rapid-Data-Evidence-Review-Final-Hidden-in-Plain-Sight-compressed.pdf>
3. Public Health England. *Disparities in the Risk and Outcomes from COVID-19*. PHE publications; 2020. Accessed June 3, 2020. [https://assets.publishing.service.gov.uk/government/uploads/system/uploads/attachment\\_data/file/889195/disparities\\_review.pdf](https://assets.publishing.service.gov.uk/government/uploads/system/uploads/attachment_data/file/889195/disparities_review.pdf)
4. Pan D, Sze S, Minhas JS, et al. The impact of ethnicity on clinical outcomes in COVID-19: A systematic review. *EClinicalMedicine*. Published online June 2020:100404. doi:10.1016/j.eclinm.2020.100404
5. Feuer W. Worldwide coronavirus cases top 200,000, doubling in two weeks KEY POINTS Worldwide coronavirus cases top 200,000, doubling in two weeks. Published online March 18, 2020. <https://www.cnbc.com/2020/03/18/worldwide-coronavirus-cases-top-200000-for-the-first-time.html>
6. van Elsland SL, O’Hare R. Coronavirus pandemic could have caused 40 million deaths if left unchecked. Published 2020. Accessed May 28, 2020. <https://www.imperial.ac.uk/news/196496/coronavirus-pandemic-could-have-caused-40/>
7. Lewnard JA, Lo NC. Scientific and ethical basis for social-distancing interventions against COVID-19. *Lancet Infect Dis*. Published online 2020. doi:10.1016/S1473-

- 1  
2  
3 3099(20)30190-0  
4  
5 8. Flaxman S, Mishra S, Gandy A, et al. Report 13: Estimating the number of infections  
6 and the impact of non-pharmaceutical interventions on COVID-19 in 11 European  
7 countries. doi:10.25561/77731  
8  
9  
10 9. World Health Organisation. Basic protective measures against the new coronavirus.  
11 Published 2020. Accessed June 1, 2020.  
12 <https://www.who.int/emergencies/diseases/novel-coronavirus-2019/advice-for-public>  
13  
14  
15 10. Park M, Cook AR, Lim J, Sun Y, Dickens B. A Systematic Review of COVID-19  
16 Epidemiology Based on Current Evidence. *J Clin Med*. 2020;9(4):967.  
17 doi:10.3390/jcm9040967  
18  
19  
20 11. Harapan H, Itoh N, Yufika A, et al. The COVID-19 pandemic calls for spatial  
21 distancing and social closeness: not for social distancing! *J Infect Public Health*.  
22 2020;13(5):667-673. doi:10.1016/j.jiph.2020.03.019  
23  
24  
25 12. Lin C, Ye R, Xia YL. A meta-analysis to evaluate the effectiveness of real-time PCR  
26 for diagnosing novel coronavirus infections. *Genet Mol Res*. 2015;14(4):15634-15641.  
27 doi:10.4238/2015.December.1.15  
28  
29  
30 13. Viner RM, Russell S, Croker H, et al. School closure and management practices during  
31 coronavirus outbreaks including COVID-19: a rapid systematic review. *Lancet Child*  
32 *Adolesc Heal*. 2020;4(5):397-404. doi:10.1016/S2352-4642(20)30095-X  
33  
34  
35 14. Brooks SK, Webster RK, Smith LE, et al. The psychological impact of quarantine and  
36 how to reduce it: rapid review of the evidence. *Lancet*. 2020;395(10227):912-920.  
37 doi:10.1016/S0140-6736(20)30460-8  
38  
39  
40 15. Webster RK, Brooks SK, Smith LE, Woodland L, Wessely S, James R. How to  
41 improve adherence with quarantine: Rapid review of the evidence. *medRxiv Prepr*.  
42 Published online 2020. doi:10.1101/2020.03.17.20037408  
43  
44  
45 16. Mahtani KR, Heneghan C, Aronson JK. What is the evidence for social distancing  
46 during global pandemics? A rapid summary of current knowledge. Published 2020.  
47 Accessed May 28, 2020. [https://www.phc.ox.ac.uk/files/covid-19-evidence-](https://www.phc.ox.ac.uk/files/covid-19-evidence-service/what-is-the-evidence-for-social-distancing-during-global-pandemics-final-1.pdf/view)  
48 [service/what-is-the-evidence-for-social-distancing-during-global-pandemics-final-](https://www.phc.ox.ac.uk/files/covid-19-evidence-service/what-is-the-evidence-for-social-distancing-during-global-pandemics-final-1.pdf/view)  
49 [1.pdf/view](https://www.phc.ox.ac.uk/files/covid-19-evidence-service/what-is-the-evidence-for-social-distancing-during-global-pandemics-final-1.pdf/view)  
50  
51  
52  
53  
54 17. Rashid H, Ridda I, King C et al. Evidence compendium and advice on social  
55 distancing and other related measures for response to an influenza pandemic. *Paediatr*  
56 *Respir Rev*. 2015;16(2):119-126.  
57  
58  
59 18. Fong M, Gao Hi, Wong J, et al. Nonpharmaceutical Measures for Pandemic Influenza  
60

- 1  
2  
3 in Nonhealthcare Settings-Social Distancing Measures. *Emerg Infect Dis.*  
4 2020;26(5):976-984. doi:10.3201/eid2605.190995  
5  
6  
7 19. Ferguson N, Laydon D, Nedjati-Gilani G, et al. Report 9 - Impact of non-  
8 pharmaceutical interventions (NPIs) to reduce COVID-19 mortality and healthcare  
9 demand. doi:10.25561/77482  
10  
11  
12 20. Lai S, Ruktanonchai NW, Zhou L, et al. Effect of non-pharmaceutical interventions to  
13 contain COVID-19 in China. *Nature*. Published online May 4, 2020.  
14 doi:10.1038/s41586-020-2293-x  
15  
16  
17 21. Bayham J, Fenichel E. Impact of school closures for COVID-19 on the US health-care  
18 workforce and net mortality: a modelling study. *Lancet Public Heal.* 2020;5:e271-  
19 e278. doi:10.1016/S2468-2667(20)30082-7  
20  
21  
22 22. Hellewell J, Abbott S, Gimma A, et al. Feasibility of controlling COVID-19 outbreaks  
23 by isolation of cases and contacts. *Lancet Glob Heal.* 2020;8(4):e488-e496.  
24 doi:10.1016/S2214-109X(20)30074-7  
25  
26  
27 23. Prem K, Liu Y, Russell T, et al. The effect of control strategies to reduce social mixing  
28 on outcomes of the COVID-19 epidemic in Wuhan, China: a modelling study. *Lancet*  
29 *Public Heal.* 2020;5:e261-e270. doi:10.1016/S2468-2667(20)30073-6  
30  
31  
32 24. Koo JR, Cook AR, Park M, et al. Interventions to mitigate early spread of SARS-CoV-  
33 2 in Singapore: a modelling study. *Lancet Infect Dis.* Published online 2020.  
34 doi:10.1016/S1473-3099(20)30162-6  
35  
36  
37 25. Tang B, Xia F, Tang S, et al. The effectiveness of quarantine and isolation determine  
38 the trend of the COVID-19 epidemics in the final phase of the current outbreak in  
39 China. *Int J Infect Dis.* 2020;95:288-293. doi:10.1016/j.ijid.2020.03.018  
40  
41  
42 26. Tang B, Wang X, Li Q, et al. Estimation of the Transmission Risk of the 2019-nCoV  
43 and Its Implication for Public Health Interventions. *J Clin Med.* 2020;9(2):462.  
44 doi:10.3390/jcm9020462  
45  
46  
47 27. Rocklöv J, Sjödin H, Wilder-Smith A. COVID-19 outbreak on the Diamond Princess  
48 cruise ship: estimating the epidemic potential and effectiveness of public health  
49 countermeasure. *J Travel Med.* 2020;27(3). doi:https://doi.org/10.1093/jtm/taaa030  
50  
51  
52 28. Panovska-Griffiths J. Can mathematical modelling solve the current Covid-19 crisis?  
53 *BMC Public Health.* 2020;20(1):551. doi:10.1186/s12889-020-08671-z  
54  
55  
56 29. Chu DK, Akl EA, Duda S, Solo K, Yaacoub S, Schünemann HJ. Physical distancing,  
57 face masks, and eye protection to prevent person-to-person transmission of SARS-  
58 CoV-2 and COVID-19: a systematic review and meta-analysis. *Lancet.* Published  
59  
60

- 1  
2  
3 online June 2020. doi:10.1016/S0140-6736(20)31142-9  
4  
5 30. Nussbaumer-Streit B, Mayr V, Dobrescu A, et al. Quarantine alone or in combination  
6 with other public health measures to control COVID-19: a rapid review. *Cochrane*  
7 *database Syst Rev.* 2020;4:CD013574. doi:10.1002/14651858.CD013574  
8  
9  
10 31. Jefferson T, Del Mar C, Dooley L, et al. Physical interventions to interrupt or reduce  
11 the spread of respiratory viruses. *Cochrane database Syst Rev.* 2011;(7).  
12 doi:10.1002/14651858.CD006207.pub4  
13  
14  
15 32. University of Michigan. Michigan Medicine projections show aggressive social  
16 distancing will dramatically reduce the peak number of hospitalized COVID-19  
17 patients. Published 2020. [https://www.uofmhealth.org/news/archive/202003/michigan-](https://www.uofmhealth.org/news/archive/202003/michigan-medicine-projections-show-aggressive-social)  
18 [medicine-projections-show-aggressive-social](https://www.uofmhealth.org/news/archive/202003/michigan-medicine-projections-show-aggressive-social)  
19  
20  
21  
22 33. Gough D, Oliver S, Thomas J. *An Introduction to Systematic Reviews* . 2nd ed. Sage;  
23 2017.  
24  
25  
26 34. Khan K, Kunz R, Kleijnen J, Antes G. *Systematic Review: To Support Evidence Based*  
27 *Medicine*. CRC Press; 2011.  
28  
29  
30 35. Shamseer L, Moher D, Clarke M, et al. Preferred reporting items for systematic review  
31 and meta-analysis protocols (PRISMA-P) 2015: elaboration and explanation. *Br Med*  
32 *J.* 2015;349(jan02 1):g7647-g7647. doi:10.1136/bmj.g7647  
33  
34  
35 36. Moher D, Liberati A, Tetzlaff J, Altman DG. Preferred reporting items for systematic  
36 reviews and meta-analyses: The PRISMA statement. *BMJ.* 2009;339(7716):332-336.  
37 doi:10.1136/bmj.b2535  
38  
39  
40 37. Tufanaru C MZAECJHL. *Chapter 3: Systematic Reviews of Effectiveness*. In:  
41 *Aromataris E, Munn Z (Editors). Joanna Briggs Institute Reviewer's Manual*. The  
42 Joanna Briggs Institute, Available from <https://reviewersmanual.joannabriggs.org/>;  
43 2017.  
44  
45  
46 38. Borenstein M. *Common Mistakes in Meta-Analysis and How to Avoid Them*. USA:  
47 Biostat, Inc; 2019.  
48  
49  
50 39. Sterne J, Egger M, Moher D. *Addressing Reporting Biases*. Wiley; 2008.  
51  
52 40. Duval S, Tweedie R. Trim and Fill: A Simple Funnel-Plot-Based Method of Testing  
53 and Adjusting for Publication Bias in Meta-Analysis. *Biometrics.* 2000;56(2):455-463.  
54 doi:10.1111/j.0006-341X.2000.00455.x  
55  
56  
57 41. Higgins JPT, Thomas J, Chandler J, et al. *Cochrane Handbook for Systematic Reviews*  
58 *of Interventions*. Wiley ; 2019.  
59  
60 42. Borenstein M, Hedges L, Higgins J et al. *Introduction to Meta-Analysis*. Wiley; 2009.

- 1  
2  
3 43. Borenstein M, Higgins J, Hedges L, Rothstein H. Basics of meta-analysis: I 2 is not an  
4 absolute measure of heterogeneity. *Res Synth Methods*. 2017;8(1):5-18.  
5  
6 doi:10.1002/jrsm.1230  
7
- 8 44. Rodgers M, Sowden A, Petticrew M, et al. Testing Methodological Guidance on the  
9 Conduct of Narrative Synthesis in Systematic Reviews. *Evaluation*. 2009;15(1):49-73.  
10  
11 doi:10.1177/1356389008097871  
12
- 13 45. Sterne J, Savović J, Page M, et al. RoB 2: a revised tool for assessing risk of bias in  
14 randomised trials. *Br Med J*. Published online August 28, 2019:14898.  
15  
16 doi:10.1136/bmj.l4898  
17
- 18 46. Sterne J, Hernán M, Reeves B, et al. ROBINS-I: a tool for assessing risk of bias in  
19 non-randomised studies of interventions. *Br Med J*. Published online October 12,  
20  
21 2016:i4919. doi:10.1136/bmj.i4919  
22
- 23 47. Gallè F, Sabella E, Da Molin G, et al. Understanding Knowledge and Behaviors  
24 Related to CoViD–19 Epidemic in Italian Undergraduate Students: The EPICO Study.  
25  
26 *Int J Environ Res Public Health*. 2020;17(10):3481. doi:10.3390/ijerph17103481  
27
- 28 48. Weinfurt KP, Moghaddam FM. Culture and Social Distance: A Case Study of  
29 Methodological Cautions. *J Soc Psychol*. 2001;141(1):101-110.  
30  
31 doi:10.1080/00224540109600526  
32
- 33 49. Rose TC, Mason K, Pennington A, Mchale P, Taylor-Robinson D, Barr B. Inequalities  
34 in COVID19 mortality related to ethnicity and socioeconomic deprivation. *medRxiv*  
35  
36 *Prepr*. Published online 2020. doi:10.1101/2020.04.25.20079491  
37
- 38 50. Marmot M, Allen J, Boyce T, Goldblatt P, Morrison J. *Health Equity in England: The*  
39  
40 *Marmot Review 10 Years On*. Institute of Health Equity; 2020.  
41
- 42 51. Pollock AM, Roderick P, Cheng K, Pankhania B. Covid-19: Why is the UK  
43 government ignoring WHO's advice? *Br Med J*. 2020;368. doi:10.1136/bmj.m1284  
44
- 45 52. Regmi K, Gilbert R, Thunhurst C. How can health systems be strengthened to control  
46 and prevent an Ebola outbreak? A narrative review. *Infect Ecol Epidemiol*.  
47  
48 2015;5(1):28877. doi:10.3402/iee.v5.28877  
49
- 50 53. Wolkewitz M, Puljak L. Methodological challenges of analysing COVID-19 data  
51 during the pandemic. *BMC Med Res Methodol*. 2020;20(1):81. doi:10.1186/s12874-  
52  
53 020-00972-6  
54
- 55 54. Shokraneh F. Keeping up with studies on covid-19: systematic search strategies and  
56 resources. *Br Med J*. Published online April 23, 2020:m1601. doi:10.1136/bmj.m1601  
57
- 58 55. Glasziou P. Waste in covid-19 research. *Br Med J* . 2020;369(m1847).  
59  
60

1  
2  
3  
4  
5  
6  
7  
8  
9  
10  
11  
12  
13  
14  
15  
16  
17  
18  
19  
20  
21  
22  
23  
24  
25  
26  
27  
28  
29  
30  
31  
32  
33  
34  
35  
36  
37  
38  
39  
40  
41  
42  
43  
44  
45  
46  
47  
48  
49  
50  
51  
52  
53  
54  
55  
56  
57  
58  
59  
60

For peer review only



# BMJ Open

## Impact of non-pharmaceutical interventions for reducing transmission of coronavirus disease 2019 [COVID-19]: A systematic review and meta-analysis protocol

|                                 |                                                                                                                                                                                                                                                |
|---------------------------------|------------------------------------------------------------------------------------------------------------------------------------------------------------------------------------------------------------------------------------------------|
| Journal:                        | <i>BMJ Open</i>                                                                                                                                                                                                                                |
| Manuscript ID                   | bmjopen-2020-041383.R1                                                                                                                                                                                                                         |
| Article Type:                   | Protocol                                                                                                                                                                                                                                       |
| Date Submitted by the Author:   | 12-Aug-2020                                                                                                                                                                                                                                    |
| Complete List of Authors:       | Regmi, Krishna; University of Bedfordshire, Institute for Health Research, Faculty of Health and Social Sciences ; University of Dundee School of Medicine, Centre for Medical Education<br>Lwin, Cho ; University of Dental Medicine Mandalay |
| <b>Primary Subject Heading</b>: | Infectious diseases                                                                                                                                                                                                                            |
| Secondary Subject Heading:      | Public health, Research methods                                                                                                                                                                                                                |
| Keywords:                       | Infection control < INFECTIOUS DISEASES, Public health < INFECTIOUS DISEASES, EPIDEMIOLOGY, INFECTIOUS DISEASES, COVID-19                                                                                                                      |
|                                 |                                                                                                                                                                                                                                                |

SCHOLARONE™  
Manuscripts





I, the Submitting Author has the right to grant and does grant on behalf of all authors of the Work (as defined in the below author licence), an exclusive licence and/or a non-exclusive licence for contributions from authors who are: i) UK Crown employees; ii) where BMJ has agreed a CC-BY licence shall apply, and/or iii) in accordance with the terms applicable for US Federal Government officers or employees acting as part of their official duties; on a worldwide, perpetual, irrevocable, royalty-free basis to BMJ Publishing Group Ltd ("BMJ") its licensees and where the relevant Journal is co-owned by BMJ to the co-owners of the Journal, to publish the Work in this journal and any other BMJ products and to exploit all rights, as set out in our [licence](#).

The Submitting Author accepts and understands that any supply made under these terms is made by BMJ to the Submitting Author unless you are acting as an employee on behalf of your employer or a postgraduate student of an affiliated institution which is paying any applicable article publishing charge ("APC") for Open Access articles. Where the Submitting Author wishes to make the Work available on an Open Access basis (and intends to pay the relevant APC), the terms of reuse of such Open Access shall be governed by a Creative Commons licence – details of these licences and which [Creative Commons](#) licence will apply to this Work are set out in our licence referred to above.

Other than as permitted in any relevant BMJ Author's Self Archiving Policies, I confirm this Work has not been accepted for publication elsewhere, is not being considered for publication elsewhere and does not duplicate material already published. I confirm all authors consent to publication of this Work and authorise the granting of this licence.

1  
2  
3 **Impact of non-pharmaceutical interventions for reducing transmission of coronavirus**  
4 **disease 2019 [COVID-19]: A systematic review and meta-analysis protocol**  
5  
6  
7  
8  
9  
10  
11  
12

13 Krishna Regmi<sup>1,2</sup>, Cho Mar Lwin<sup>3</sup>

14  
15 <sup>1</sup>Institute for Health Research, University of Bedfordshire, Luton, UK

16  
17 <sup>2</sup>School of Medicine, University of Dundee, Dundee, UK

18  
19 <sup>3</sup>University of Medicine Mandalay, Mandalay, Myanmar  
20  
21  
22  
23  
24  
25  
26  
27  
28  
29  
30  
31  
32

33 **Correspondence to**

34 Krishna Regmi

35  
36 Institute for Health Research

37 University of Bedfordshire

38  
39 Luton LU1 3JU

40  
41 United Kingdom

42  
43 Email: [Krishna.r.regmi@gmail.com](mailto:Krishna.r.regmi@gmail.com)  
44  
45  
46  
47  
48  
49  
50  
51  
52  
53  
54

55 **Keywords:** Non-pharmaceutical interventions, Social distancing, COVID-19, Prevention,  
56 Control, Systematic review  
57  
58  
59  
60

## Impact of non-pharmaceutical interventions for reducing transmission of coronavirus disease 2019 [COVID-19]: A systematic review and meta-analysis protocol

### Abstract

**Introduction:** Implementing non-pharmaceutical interventions (NPIs) protect the public from coronavirus disease 2019 (COVID-19). However, the impact of NPIs has been inconsistent and remains unclear. This study, therefore, aims to measure the impact of NPIs (social distancing, social isolation and quarantine) on reducing COVID-19 transmission.

**Methods and analysis:** We will conduct a systematic review (SR) and meta-analysis (MA) research of both randomised and non-randomised controlled trials. We will undertake a systematic search of: MEDLINE, EMBASE, Allied & Complementary Medicine, COVID-19 Research, WHO database on COVID-19, ClinicalTrials.Gov for clinical trials on COVID-19, Cochrane Resources on Coronavirus (COVID-19), Oxford COVID-19 Evidence Service, Google Scholar for published and unpublished literatures on COVID-19 including pre-print engines such as medRxiv, bioRxiv, LitCovid and SSRN for unpublished studies on COVID-19, and will be reported in accordance with PRISMA. Outcomes of interest for impact analysis will include the reduction of COVID-19 transmission, avoiding crowds and restricting movement, isolating ill and psychological impacts. The Preferred Reporting Items for Systematic Review and Meta-Analysis Protocols (PRISMA-P) checklist has been used for this protocol. For quality of included studies, we will use the Cochrane Collaboration's tool for assessing risk of bias for randomised controlled trials and the Newcastle Ottawa scale for observational studies. The GRADE approach will grade the certainty of the evidence for all outcome measures across studies. A narrative synthesis – performing thematic analysis – will be conducted for all included studies. Random-effects model for meta-analysis will measure the effect size of NPIs or the strengths of relationships. To assess the heterogeneity of effects,  $I^2$  together with the observed effects will be evaluated to provide the true effects in the analysis.

**Ethics and dissemination:** Ethics approval and consent will not be required for this systematic literature review, as it does not involve human participation. We will disseminate the study findings as follows: publishing at least one paper in peer-reviewed journals, and an abstract will be presented at suitable national/international conferences or workshops. We will also share important information with public health authorities as well as with the World

1  
2  
3 Health Organization (WHO). In addition, we may post the submitted manuscript under  
4 review to medRxiv, or other relevant pre-print servers.  
5  
6  
7

### 8 **Strengths and limitations of this study**

- 9
- 10 • To our knowledge, this study is the first SR to measure the impact of NPIs – social
- 11 distancing, isolation and quarantine – on reducing COVID-19 transmission.
- 12
- 13 • This study will offer the highest level of evidence to assist policy-makers and researchers
- 14 in synthesising a large and complex literature, drawing a broader framework.
- 15
- 16 • This protocol reduces the possibility of duplication, provides transparency to the methods
- 17 and procedures used, minimises potential biases and allows peer-review.
- 18
- 19 • This research is not externally funded, and therefore time and resource will be
- 20 constrained.
- 21
- 22 • If included studies vary in sample size, quality and population, they may be open to bias,
- 23 and the heterogeneity of data will preclude a meaningful meta-analysis to measure the
- 24 effects of specific NPIs.  
25  
26  
27  
28  
29  
30

### 31 **Introduction**

32  
33 Coronavirus disease 2019 (COVID-19; caused by severe acute respiratory syndrome  
34 coronavirus 2 [SARS-CoV-2]) emerged in Wuhan, China in December 2019, and has been  
35 posing a global public health threat. On March 11, 2020, WHO declared the COVID-19  
36 outbreak a pandemic.<sup>1</sup> At the time of writing (August 10, 2020), the WHO COVID-19  
37 Situation Dashboard reports that this virus has already affected 216 countries, areas or  
38 territories with 19,462,112 confirmed cases of COVID-19 and 722,285 deaths; a fatality rate  
39 of approximately 4% (3.71%).<sup>2</sup>  
40  
41  
42  
43  
44

45 Based on reported cases, approximately 1:10 reported infections were among  
46 healthcare professionals, e.g. medical doctors, nurses.<sup>3</sup> We have seen disproportionate  
47 numbers of black, Asian and minority ethnic (BAME) doctors and other healthcare  
48 professionals die from COVID-19 in the UK. A study conducted by Cook and Lennane  
49 reported that in the National Health Service (NHS), it is estimated 21% of all staff are  
50 BAME, whereas 63% of healthcare professionals who died were BAME. Similarly, 20%  
51 of nursing staff are BAME whereas 64% of nurses who died were BAME, and 44% of  
52 medical staff are BAME whereas 95% of doctors who died were BAME.<sup>4</sup>  
53  
54  
55  
56  
57  
58  
59  
60

1  
2  
3 Similarly, the COVID-19 mortality rate in the USA for African-Americans was 2.4-  
4 2.7 times more than for White individuals.<sup>3</sup> However, deaths are not consistent across these  
5 groups. A recent UK government review<sup>5</sup> highlighted that the highest age-standardised  
6 diagnosis rates of COVID-19 per 100,000 population were in people of BAME groups (486  
7 female and 649 male) and the lowest were in White people (220 female and 224 male).  
8 Accounting for the effect of sex, age, deprivation and region, Bangladeshi people had about  
9 twice the risk of death compared with White British. Similarly, Chinese, Indian, Pakistani,  
10 other Asian, Caribbean and other Black ethnicity had between 10 and 50% higher risk of  
11 death compared to White British. Death rates from COVID-19 were higher for BAME groups  
12 compared to White ethnic groups. In fact, this is the opposite of observations in previous  
13 years, when all-cause mortality rates were lower in BAME. Compared to previous years, all-  
14 cause mortality was almost four times higher than expected among Black males for this  
15 period, almost three times higher in Asian males and almost two times higher in White males.  
16 Among females, deaths were almost three times higher in this period in Black, Mixed and  
17 Other females, and 2.4 times higher in Asian females compared with 1.6 times in White  
18 females.<sup>3,5</sup>

19  
20  
21  
22  
23  
24  
25  
26  
27  
28  
29  
30  
31 Several factors could be considered, e.g. ethnicity, age, sex, co-morbidities (diabetes,  
32 renal conditions), occupation, socio-economic status, multifamily and multigenerational  
33 households.<sup>6-8</sup> Likewise, several studies identified physical and psychological impacts of  
34 COVID-19. The commonest associated factors reported were: anxiety,<sup>9</sup> increased time in  
35 quarantine associated with post-traumatic stress disorder, depression,<sup>9</sup> distance of physical  
36 activity,<sup>10</sup> loss of social interaction, and emotional and psychological distress.<sup>11</sup> One cross-  
37 sectional survey in Canada reported the psychological effects of quarantine:  
38  
39  
40  
41  
42

43 The mandated lack of social and, especially, physical contact with family members  
44 were identified as particularly difficult. Confinement at home and work, being unable  
45 to see friends, being unable to shop for basic necessities of everyday life, and being  
46 unable to purchase thermometers and prescribed medications enhanced their feeling  
47 of distance from the outside world.<sup>9(p.10)</sup>

48  
49  
50  
51  
52  
53 It is difficult to predict an exact future, but recent data from Johns Hopkins University  
54 reported that global COVID-19 deaths have surpassed 700,000.<sup>12</sup> Imperial College London  
55 highlights that this outbreak could kill 40 million people this year without public health  
56 measures (e.g. case finding, contact tracing and testing, and strict quarantine).<sup>7</sup> Evidence  
57 suggests that the number of cases reported would possibly “represent an underestimation of  
58  
59  
60

1  
2  
3 the true burden due to lack of surveillance and diagnostic capacity”<sup>8</sup> as well as  
4 pharmaceuticals to manage severe COVID-19.<sup>13</sup>  
5  
6

7 Several countries, including the United Kingdom (UK), United States of America  
8 (USA) and other European Union (EU) countries are adopting social distancing measure  
9 (SDM) as a form of non-pharmaceutical or physical interventions to control COVID-19 by  
10 slowing down transmission of the virus and preventing associated illness and death.<sup>14</sup> Social  
11 distancing (SD) is the new buzzword with the outbreak of coronavirus and COVID-19. In the  
12 literature, the term SD can have different meanings; for example, some considered it as  
13 strategy,<sup>15</sup> policy,<sup>16</sup> an approach to flatten the curve,<sup>17</sup> mitigation measure to increase  
14 physical distance or reduce frequency of congregation in socially dense community  
15 settings.<sup>18–20</sup> Flaxman et al.<sup>13</sup> defined SD as a measure to ban large gatherings and advise  
16 individuals not to socialise outside their households by closing borders, some public places,  
17 schools and universities; isolation/quarantine, physical distancing and room separation to  
18 isolate symptomatic individuals and their contacts; and large-scale lockdowns of populations  
19 by staying at least 2m apart aiming to minimise mixing of infectious susceptible patients.  
20 This definition of SD, in fact, is very vague and includes interventions which are considered  
21 different to social distancing, e.g. quarantine including school closure and case findings.  
22  
23

24 For clarity, in this SR, the definition of SD (also called physical distancing) is  
25 considered as a set of NPIs intended to prevent spread of COVID-19 by maintaining physical  
26 distance between people and reducing the number of times people come into close  
27 contact.<sup>21,22</sup> This review focuses only on COVID-19/SARS-CoV-2 and three major NPIs,  
28 namely social distancing, isolation and quarantine. Isolation of cases refers to the separation  
29 of ill persons with contagious diseases from non-infected persons, either hospitalised  
30 (moderate or severe cases) to provide care, or in dedicated isolation facilities or at home  
31 (mild cases),<sup>23</sup> and quarantine is the restriction of persons who are presumed to have been  
32 exposed to a contagious disease but are not ill, either because they did not become infected or  
33 because they are still in the incubation period.<sup>24</sup> WHO recommends isolation, physical  
34 (social) distancing, contact tracing and quarantine of close contacts as the key measures to  
35 reduce COVID-19.<sup>25s</sup>  
36  
37

38 A preliminary scan of the work (book, chapter, report or article) using a quick Google  
39 Scholar search and PubMed using variations on the ultimate search terms, e.g. COVID-19  
40 and NPIs, shows some empirical research on COVID-19 from China, South Korea, UK, USA  
41 and other countries, but these are not systemically reviewed or synthesised well. Several  
42 rapid reviews and summaries have been covered on COVID-19 epidemiology,<sup>26,27</sup> the  
43  
44  
45  
46  
47  
48  
49  
50  
51  
52  
53  
54  
55  
56  
57  
58  
59  
60

1  
2  
3 effectiveness of real-time PCR for diagnosis,<sup>28</sup> effects of school closure,<sup>29</sup> quarantine,<sup>30,31</sup>  
4 social distancing<sup>32</sup> (study primarily based on two previous reviews<sup>33,34</sup> on influenza from  
5 2012 and 2018, respectively), and mathematical modelling studies incorporating the effect of  
6 social distancing.<sup>13,23,35–42</sup> These models would generally help to “predict epidemic curve  
7 representing the number of infections caused by the virus over time.”<sup>43</sup>  
8  
9

10  
11  
12 Recently, some SRs and MAs have been conducted to investigate the optimum  
13 distance for avoiding transmissions and ethnicity and clinical outcomes.<sup>44,45</sup> Cochrane further  
14 conducted three studies; First, a rapid review in 2020, involving 29 studies on COVID-19  
15 from China, UK, South Korea and Japan.<sup>46</sup> Second, a rapid qualitative evidence synthesis  
16 conducted in 2020 capturing 36 studies from Asia, Africa, Central and North America and  
17 Australia examining healthcare workers’ adherence and enablers or challenges associated  
18 with infection control guidelines for respiratory infections. Another study examined 67  
19 studies including RCTs and observational studies exploring the role of physical interventions  
20 for reducing the spread of respiratory viruses, and found no evidence regarding screening at  
21 entry ports and social distancing.<sup>47</sup>  
22  
23  
24  
25  
26  
27  
28

29  
30 Lewnard and Lo<sup>8</sup> and Michigan Medicine Projections<sup>48</sup> reported that combined NPIs  
31 using social distancing, isolation and quarantine, including workplace distancing, appeared  
32 effective in reducing COVID-19 compared to no interventions. This approach, however,  
33 reported considerable challenges, e.g. societal disruption, social isolation/rejection, mental  
34 stress and psychological trauma, lack of tests and testing facilities, poor contact tracing and  
35 lack of surveillance. No studies examined the effects of NPIs in reducing the transmission of  
36 COVID-19. This study, therefore, aims to measure the impact of NPIs on reducing COVID-  
37 19 transmission.  
38  
39  
40  
41  
42  
43  
44

### 45 **Review question**

46 What has been the impact of NPIs – social distancing, quarantine and isolation – on reducing  
47 transmission of coronavirus disease 2019 [COVID-19]?  
48  
49  
50

### 51 **Methods and designs**

52 This study will utilise a SR and MA, which will consider both randomised controlled trials  
53 and non-randomised trials (prospective and retrospective observational studies). The  
54 PRISMA-P checklist has been used in the preparation of this protocol.<sup>49</sup> In addition, we also  
55 completed a 27-item PRISMA checklist (Additional file 1).  
56  
57  
58  
59  
60



## Criteria for considering studies for review

### *Inclusion criteria*

1. Study design – we will not add a study design filter. To measure the impact of NPIs, we will follow both randomised controlled trials and non-randomised controlled trials, e.g. cross-sectional, survey, case-control, randomised controlled trials, observational studies (retrospective or prospective).
2. Intervention – we will include research describing major NPIs, e.g. social distance, isolation and quarantine focusing only COVID-19/SARS-CoV-2.
3. Population – we will include all age, gender, ethnic (Black, Asian, White) and healthcare workers (medical doctors, nurses, allied healthcare professions) groups.
4. Research reporting different factors and NPIs, e.g., social distance by avoiding crowds and restricting movement, isolating ill people and quarantine of exposed people and reducing transmission of COVID-19. Where possible, additional outcomes including anxiety, physical and psychological distress and depression will be examined.
5. Articles published in English language, regardless of study location or setting, up to July 2020. [We proposed to collect data from August/September until October/November 2020 for the study]

### *Exclusion criteria*

1. Articles in narrative reviews, modelling studies, opinion pieces, letters, news, editorials, perspectives, commentaries, conference abstracts and other publications lacking primary data and/or poor methodological details.
2. Studies containing duplicate datasets.

## Search strategy to identify relevant studies

We aim to undertake a systematic search of the following sources: MEDLINE, EMBASE, Allied & Complementary Medicine, COVID-19 Research, WHO database on COVID-19, ClinicalTrials.Gov for clinical trials on COVID-19, Cochrane Resources on Coronavirus (COVID-19), Oxford COVID-19 Evidence Service, Google Scholar for published and unpublished literatures on COVID-19 including pre-print engines such as medRxiv, bioRxiv, LitCovid and SSRN for unpublished studies on COVID-19 will be searched given the lags in publication. The literature search uses the following terms: “social distancing”, “quarantine”, “isolation”, “non-pharmacological interventions [NPIs]”, “psychological distress”, “anxiety”



1  
2  
3 combined with “COVID-19”. Primary search terms are non-pharmacological interventions or  
4 measures (all synonyms) and COVID-19 (all synonyms) using ‘Textword searching’ –  
5 searching for a word or phrase anywhere in the document, where the document is the citation  
6 (article title, journal name, author), not the full text of an article, and ‘Thesaurus (MeSH,  
7 Emtree) searching’, employing Boolean operators and truncations. The ‘Related Articles’  
8 feature in PubMed will be consulted. Searches will also be supplemented by reviewing the  
9 reference lists (‘references of references’) of selected articles to find any other relevant  
10 papers. From the identified studies in the search, forward and backward citations will also be  
11 carried out to find potential studies reporting NPIs and reducing transmission of COVID-19  
12 for the full texts. The literature search strategy was developed by KR in collaboration with  
13 departmental subject librarians from authors’ universities, who were experienced in SRs, and  
14 subsequently refined ensuring its comprehensiveness. While piloting the search strategy, we  
15 followed these broad steps:

- 16 • Tested out keywords and phrases in a MEDLINE database to see the number of hits  
17 returned, and assessed the degree of relevance;
- 18 • Reviewed some (e.g. five) papers including those marked ‘highly cited’ on COVID-  
19 19/SARS-CoV-2 that meet inclusion/exclusion criteria, where we looked at the terms  
20 used in the titles and abstracts for main concepts e.g. NPIs and COVID-19.
- 21 • Took notes of keywords supplied by authors and incorporated those into our strategy.
- 22 • Experimented with combinations of keywords using ‘AND’ (limits search) and ‘OR’  
23 (expands search) operators.
- 24 • Looked at subject headings assigned for key papers and used them too.

25  
26  
27  
28  
29  
30  
31  
32  
33  
34  
35  
36  
37  
38  
39  
40  
41  
42  
43 A broad search strategy has been designed to maximise the level of sensitivity (or  
44 comprehensiveness) in searching,<sup>50</sup> and improve both *recall ratio* (number of relevant  
45 references retrieved divided by all of the relevant references) and *precision ratio* (number of  
46 relevant references retrieved divided by the number of references retrieved).<sup>51(p.34)</sup> Key terms  
47 for one MEDLINE are shown in Table 1.  
48  
49  
50  
51  
52  
53  
54  
55  
56  
57  
58  
59  
60

**Table 1.** Search strategy for MEDLINE

| Concepts          | Search terms in each concepts will be modified as needed for use in other databases                                                                                                                                                                                                                                                                                                                                                                                                                                                                                                                                                                                                                                                                                                                                                                                                                                                                                                                                                                                                                            |
|-------------------|----------------------------------------------------------------------------------------------------------------------------------------------------------------------------------------------------------------------------------------------------------------------------------------------------------------------------------------------------------------------------------------------------------------------------------------------------------------------------------------------------------------------------------------------------------------------------------------------------------------------------------------------------------------------------------------------------------------------------------------------------------------------------------------------------------------------------------------------------------------------------------------------------------------------------------------------------------------------------------------------------------------------------------------------------------------------------------------------------------------|
| <i>Concept #1</i> | <i>Problem: COVID-19/</i>                                                                                                                                                                                                                                                                                                                                                                                                                                                                                                                                                                                                                                                                                                                                                                                                                                                                                                                                                                                                                                                                                      |
|                   | "covid 19 pandemic"[All Fields] OR "COVID19"[All Fields] OR "COVID-19"[All Fields] OR "COVID-2019"[All Fields] OR "2019-nCoV"[All Fields] OR "2019nCoV"[All Fields] OR "coronavirus infections"[All Fields] OR "coronavirus infections"[MeSH Terms] OR "coronavirus"[All Fields] OR "coronavirus"[All Fields] OR "coronavirus"[MeSH Terms] OR "coronavirus"[MeSH Terms] OR "Betacoronavirus"[MAJR] "SARS coronavirus2"[All Fields] "sars cov"[All Fields] OR "sars virus"[All Fields] OR "sars virus"[MeSH Terms] OR "SARS"[All Fields] OR "SARS2"[All Fields] OR "SARS-2"[All Fields] OR "SARScoronavirus 2"[All Fields] OR "SARScoronavirus2"[All Fields] OR "SARS-coronavirus-2"[All Fields] OR "SARS-CoV-2"[All Fields] OR "SARSCov2019*"[All Fields] OR "SARS-Cov2019*"[All Fields] OR "SARS-Cov-2019*"[All Fields] OR "severe acute respiratory syndrome coronavirus 2"[All Fields] OR "severe acute respiratory syndrome coronavirus 2"[Supplementary Concept] OR "Wuhan coronavirus"[All Fields] OR "Wuhan"[All Fields] AND ("coronavirus"[MeSH Terms] OR "coronavirus"[All Fields] OR "COVID-19"[nm]) |
| <i>Concept #2</i> | <i>Intervention: Non-Pharmaceutical Intervention</i>                                                                                                                                                                                                                                                                                                                                                                                                                                                                                                                                                                                                                                                                                                                                                                                                                                                                                                                                                                                                                                                           |
|                   | "social distancing"[TIAB] OR "cohorting"[All Fields] OR "community containment"[All Fields] OR "isolation strategy"[All Fields] OR "isolation"[All Fields] OR "patient isolation"[All Fields] OR "patient isolation"[MeSH Terms] OR "patient isolators"[All Fields] OR "patient isolators"[MeSH Terms] OR "physical contact"[All Fields] OR "physical distancing"[All Fields] OR "quarantine"[All Fields] OR "quarantines"[All Fields] OR "quarantine"[MeSH Terms] OR "social distance"[All Fields] OR "quarantines"[All Fields] OR "quarantined"[All Fields] OR "quarantining"[All Fields] OR "social distance"[MeSH Terms] OR "Social distancing"[All Fields] OR "Banning"[All Fields] OR "distancing"[All Fields]                                                                                                                                                                                                                                                                                                                                                                                           |
| <i>Concept #3</i> | <i>Outcome: (a) Reduce transmission</i>                                                                                                                                                                                                                                                                                                                                                                                                                                                                                                                                                                                                                                                                                                                                                                                                                                                                                                                                                                                                                                                                        |
|                   | "reduce"[All Fields] OR "reduced"[All Fields] OR "reduces"[All Fields] OR "transmission"[MeSH Subheading] OR "transmission"[All Fields] OR "transmissions"[All Fields] OR "prevention and control"[Subheading] OR prevention[Text Word] OR "reduce infection"[All Fields] OR infect"[All Fields] OR "infectability"[All Fields] OR "infectable"[All Fields] OR "infectant"[All Fields] OR "infectants"[All Fields] OR "infected"[All Fields] OR "infecteds"[All Fields] OR "infectibility"[All Fields] OR "infectible"[All Fields] OR "infecting"[All Fields] OR "infection s"[All Fields] OR "infections"[MeSH Terms] OR "infections"[All Fields] OR "infection"[All Fields] OR "infective"[All Fields] OR "infectiveness"[All Fields] OR "infectives"[All Fields] OR "infectivities"[All Fields] OR "infects"[All Fields] OR "pathogenicity"[MeSH Subheading] OR                                                                                                                                                                                                                                             |

|                   |                                                                                                                                                                                                                                                                                                                                                                                                                                                                                                                                                                                                                                                                                                                                                                                                               |
|-------------------|---------------------------------------------------------------------------------------------------------------------------------------------------------------------------------------------------------------------------------------------------------------------------------------------------------------------------------------------------------------------------------------------------------------------------------------------------------------------------------------------------------------------------------------------------------------------------------------------------------------------------------------------------------------------------------------------------------------------------------------------------------------------------------------------------------------|
|                   | "pathogenicity"[All Fields] OR "infectivity"[All Fields] OR "Coronavirus Infections/prevention and control"[MAJR] OR "Pandemics/prevention and control"[MAJR]                                                                                                                                                                                                                                                                                                                                                                                                                                                                                                                                                                                                                                                 |
| <i>Concept #4</i> | <i>Outcome: (b) Psychological impact</i>                                                                                                                                                                                                                                                                                                                                                                                                                                                                                                                                                                                                                                                                                                                                                                      |
|                   | "psychological distress"[MeSH Terms] OR psychological distress[Text Word] "emotional disturbance"[All Fields] OR "depressed"[All Fields] OR "depression"[MeSH Terms] OR "depression"[All Fields] OR "depressions"[All Fields] OR "depression s"[All Fields] OR "depressive disorder"[MeSH Terms] OR "depressive"[All Fields] OR "depressives"[All Fields] OR depression[Text Word] OR "stress"[All Fields] OR "stressed"[All Fields] OR "stresses"[All Fields] OR "stressful"[All Fields] OR "stressfulness"[All Fields] OR "stressing"[All Fields] OR "low mood"[All Fields] OR "insomnia"[All Fields] OR "insomnias"[All Fields] OR insomnia[Text Word] OR "insomnia's"[All Fields] OR "sleep initiation and maintenance disorders"[MeSH Terms] OR "sleep initiation and maintenance disorders"[All Fields] |

We combined these concepts (using AND), so all concepts are in the same references.

### Selection of studies

The citations identified will be imported into Mendeley Reference Manager (<https://www.mendeley.com/>). All studies emerging from the databases will be screened twice: (i) screening of titles, abstracts with two reviewers against minimum inclusion criteria, and (ii) review of full text. We will use the standard PRISMA flow diagram to provide the study selection process.<sup>52</sup>

### Quality assessment and risk of bias

Quality of the included studies will be assessed using Cochrane Collaboration's tool for assessing risk of bias for randomised controlled trials and the Newcastle Ottawa scale (NOS) for non-randomised studies.<sup>53</sup> Where possible, we will analyse randomised (according to effectiveness of randomisation method, generation of allocation sequence, allocation concealment, blinding, and follow-up) and non-randomised studies (for presence of potential confounders for case-control and cohort studies), and a three-point checklist will be used for controlled before and after studies<sup>54</sup> separately. In NOS, "a 'star system' has been developed in which a study is judged on three broad perspectives: the selection of the study groups; the comparability of the groups; and the ascertainment of either the exposure or outcome of interest for case-control or cohort studies respectively".<sup>53</sup> Some items or questions in these quality assessments e.g. blinded study, are irrelevant to social distancing studies; we therefore consider removing them. Risk of bias will be examined, as it provides variation,

1  
2  
3 e.g. heterogeneity in results of studies included in the study. As Higgins et al.<sup>50</sup> argue,  
4 rigorously conducted studies in the SR would provide more truthful results, and the results  
5 from the studies of variable validity would give either false negative or false positive  
6 conclusions. In this study, the GRADE (Grading of Recommendations Assessment,  
7 Development and Evaluation) approach will be used to assess the certainty of the evidence –  
8 risk of bias across studies.<sup>55</sup>  
9

10  
11  
12  
13  
14  
15 Generally, the bias table provides the type of bias (e.g., selective reporting of outcomes,  
16 random sequence generation, allocation of concealment, blinding of participants, personnel  
17 and assessors, incomplete outcome data and other potential threats to validity) in each study.  
18 If, for example, most rows are unshaded then that is considered a low risk of bias, whereas if  
19 some rows are either partly-shaded or dark (risk of bias either unclear or high), this would  
20 provide relatively less confidence in the results.<sup>50</sup> A narrative synthesis – performing  
21 thematic analysis – will be conducted for all included studies. Included studies will be  
22 assessed by two authors (KR, CML) and the results will inform synthesis and interpretation  
23 of the findings. To facilitate comparison of appraisal processes, all reviewers will record the  
24 rationale for inclusion or exclusion, and discrepancies will be discussed and resolved by  
25 consensus.  
26  
27  
28  
29  
30  
31  
32  
33  
34  
35

### 36 **Assessment of reporting biases**

37 Publication bias, often called reporting bias and dissemination bias, is the concern that studies  
38 reporting relatively large effects are more likely to be published than studies reporting  
39 smaller effects.<sup>56</sup> Similarly, published studies including multiple outcomes would be more  
40 likely to report the outcomes than if they showed statistically significant results.<sup>57</sup> We will  
41 use funnel plot to estimate the publication bias.<sup>58</sup> If meta-analysis had captured all relevant  
42 studies we would expect the funnel plot to be symmetric, i.e. we would expect studies to be  
43 dispersed equally on either side of the overall effect.<sup>56</sup> One approach to address publication  
44 bias is to follow the trim and fill procedures, i.e. assessing asymmetry or symmetry in the  
45 funnel plot if more than 10 eligible studies are identified.<sup>56(p.175)</sup> Trim and fill is a method  
46 which allows us to impute these studies, i.e. we determine where missing studies are likely to  
47 fall, add them to the analysis, and then recompute the combined effect. There are two parts to  
48 this method: first we impute the missing data, then re-run the analysis with the original  
49 studies plus the imputed ones, using either a fixed-effect or random-effects model. Though  
50 several studies have shown the trim and fill method may not perform well in the presence of  
51  
52  
53  
54  
55  
56  
57  
58  
59  
60

1  
2  
3 very high heterogeneity,<sup>59–62</sup> this method is equally useful for sensitivity analysis and gives  
4 less biased estimates when there is both heterogeneity and publication bias.<sup>61</sup> In fact, high  
5 heterogeneity may impact the many publication bias methods based on the funnel plot, not  
6 limited to the trim and fill method.<sup>60,62</sup>  
7  
8  
9

## 10 11 **Data analysis and synthesis**

12 A narrative synthesis, performing thematic analysis, will be conducted for the included  
13 studies. We will also provide a descriptive numerical summary. We will use risk ratios (RRs),  
14 mean differences (MD), or standardised mean differences (SMD) where applicable, for the  
15 dichotomous and continuous outcomes, respectively.<sup>56</sup>  
16  
17  
18

19 All data analyses will be carried out using Comprehensive Meta-Analysis (CMA,  
20 version 3. [https://www.meta-analysis.com/pages/new\\_v3.php?cart=BT2P4569026](https://www.meta-analysis.com/pages/new_v3.php?cart=BT2P4569026)) to  
21 measure the effect size of NPIs or the strengths of relationships employing random-effects  
22 method for meta-analysis. The purpose of using a random-effects model in the analysis is “to  
23 incorporate the assumption that the different studies are estimating different, yet related,  
24 intervention effects”.<sup>50</sup> To test the heterogeneity of effects in the included studies, we will use  
25 Higgins et al.’s  $I^2$  together with the observed effects to measure the true effects in the  
26 analysis.<sup>50</sup> The  $I^2$  test for heterogeneity is meant to evaluate whether there is variability across  
27 publications. This will be computed as follows:  
28  
29  
30  
31  
32  
33  
34  
35  
36

$$37 \quad I^2 = \left( \frac{Q - df}{Q} \right) \times 100\%$$

38  
39  
40

41 Q-value (Cochran’s heterogeneity statistic) is the sum of the squared deviations of all  
42 effect sizes from the mean effect size and  $df$  indicates the degrees of freedom. Generally, this  
43 value is on a standardised scale between 0% (not heterogeneity) and 100% (maximum  
44 heterogeneity), where a large deviation gets more weight if the estimate is precise, and less  
45 weight if the estimate is imprecise.<sup>63</sup> A rough guide, it is interpreted that: 0%-40% might not  
46 be important, 30%-60% may represent moderate heterogeneity, 50%-90% may represent  
47 substantial heterogeneity, and 75%-100% may represent considerably heterogeneity.<sup>50</sup>  
48 Generally, the importance of observed value of  $I^2$  on moderate and substantial heterogeneity  
49 depends on the magnitude and direction of effects as well as the strength of heterogeneity.<sup>50,63</sup>  
50  
51  
52  
53  
54  
55  
56  
57  
58  
59  
60

### **Tabulating included studies**

Data from eligible studies will be extracted independently by two authors using a data extraction form to record demographic data (including age, gender, ethnicity, professions), study details (aims/study question, country of origin, methods/study designs, NPI(s)), and study outcomes. As Rodgers and colleagues confirm, this would not only improve the process of transparency by better understanding the sorts of data extracted from which studies, but also recognising the contribution made by each study to the overall synthesis.<sup>64</sup> In addition, such tables will demonstrate how the individual study area contributes to the reviewers' final conclusion.

### **Dealing with missing data**

In the case of missing data that might be important to summarise/synthesise study findings, or details of the studies are unclear, we will contact all corresponding authors of included studies to give the opportunity to provide missing data. If authors do not respond, we will record the fact that we tried to contact them, and the number of non-respondents. In such cases, we can either use imputation or risk of bias tools to reduce the likelihood of this being problematic. Generally it is considered that non-responding authors are equivalent to non-responders to interviews in observational/experimental studies. The impact of this will be reported in the discussion section of the SR.

### **Subgroup analysis**

We anticipate much variation on the type and nature of NPIs or settings in relation to COVID-19. Based on the scoping search, it is difficult to disentangle the individual effect of each NPI on reducing or preventing COVID-19 transmission, as the role of combined NPIs have been often reported in different literatures, therefore we do not consider a subgroup analysis to measure which NPIs would be more effective than others. However, some emerging data confirmed cases of COVID-19 and deaths amongst (i) different healthcare professionals (medical doctors, nurses, allied healthcare professionals) and (ii) socio-economic groups (Black, Asian, White) therefore we will be doing a subgroup analysis examining the association between NPIs and cases/deaths from COVID-19/SARS-CoV-2 on those specific groups when applicable. As Higgins et al. argue, "subgroup analyses are observational by nature and are not based on randomised comparisons" so results from such multiple subgroup analyses may be misleading.<sup>50</sup>



### **Patient and public involvement**

As this is a protocol for a SR and MA, neither patients nor public will be directly involved, and ethics approval and consent will not be required.

### **Dissemination**

We will be able to disseminate the study findings as follows: publishing at least one paper in peer-reviewed journals, and abstract presented at suitable national/international conferences or workshops. We will also share important information with public health authorities as well as with the WHO. In addition, we may post the submitted manuscript under review to bioRxiv, medRxiv, or other relevant pre-print servers.

### **Discussion**

Impact of NPIs on preventing COVID-19 is a highly charged topic creating much debate among politicians, economists, and medical and public health professions. Given the rapidly-growing field, it is imperative to generate a substantial conclusion regarding the prevention, control and management of COVID-19 in public health practice. The proposed SR will therefore measure the impact of NPIs on reducing transmission of COVID-19. As such, significant outcomes from this review will guide patients and clinicians in their treatment arrangements given that there is no vaccine or treatment available at the time of writing. Furthermore, these significant findings will be vital to assist policy-makers and researchers in synthesising a large and complex literature. Similarly, this review will provide a basis for developing the best methods and approaches for developing objective measures and interventions to establish the link between different factors and NPIs and reducing transmission of COVID-19 effectively, efficiently and equitably. It is equally important that the “structure and capacity of our depleted healthcare system are now largely driving the response to this epidemic”<sup>65</sup> and most likely it will continue to do so until services that support local communicable disease control are rebuilt and reintegrated.<sup>66</sup> It is, therefore, important to make appropriate efforts now that would address COVID-19, through strengthening the primary healthcare system, to reduce the chances of future pandemics.

### **Acknowledgements**

We would like to thank Professor Jesus N. Sarol Jr. and Professor David Hewson for their help with this review. We also thank our subject librarians especially, David Abdy, for his assistance in finalising the search strategy.

## Contributors

KR conceived and designed the research with the advice from CML; KR wrote the first draft; KR and CML reviewed and contributed to drafting, revising and finalising the manuscript. All authors have reviewed and approved the final version of the manuscript and have given their permission for publication.

## Funding statement

The authors received no financial support for this research study.

## Competing interests

None declared.

## Patient consent for publication

Not required.

## References

1. World Health Organisation. WHO Director-General's opening remarks at the media briefing on COVID-19. [Internet]. 2020 <https://www.who.int/dg/speeches/detail/who-director-general-s-opening-remarks-at-the-media-briefing-on-covid-19---11-march-2020>
2. World Health Organisation. Coronavirus disease (COVID-19) pandemic. [Internet]. 2020. <https://www.who.int/emergencies/diseases/novel-coronavirus-2019>
3. Razaq A, Harrison D, Karunanithi S, Barr B, Asaria M, Khunti K. BAME COVID-19 deaths-what do we know? Rapid data & evidence review: "hidden in plain sight." [Internet]. 2020 <https://www.cebm.net/wp-content/uploads/2020/05/BAME-COVID-Rapid-Data-Evidence-Review-Final-Hidden-in-Plain-Sight-compressed.pdf>
4. Cook T, Kursumovic E, Lennane S. Exclusive: deaths of NHS staff from covid-19 analysed. *Heal Serv J*. 2020. <https://www.hsj.co.uk/exclusive-deaths-of-nhs-staff-from-covid-19-analysed/7027471.article>
5. Public Health England. *Beyond the Data: Understanding the Impact of COVID-19 on BAME Communities*. [Internet]. 2020 [https://assets.publishing.service.gov.uk/government/uploads/system/uploads/attachment\\_data/file/892376/COVID\\_stakeholder\\_engagement\\_synthesis\\_beyond\\_the\\_data.pdf](https://assets.publishing.service.gov.uk/government/uploads/system/uploads/attachment_data/file/892376/COVID_stakeholder_engagement_synthesis_beyond_the_data.pdf)
6. Public Health England. *Disparities in the Risk and Outcomes from COVID-19*.



- [Internet]. 2020.  
[https://assets.publishing.service.gov.uk/government/uploads/system/uploads/attachment\\_data/file/889195/disparities\\_review.pdf](https://assets.publishing.service.gov.uk/government/uploads/system/uploads/attachment_data/file/889195/disparities_review.pdf)
7. van Elsland SL, O'Hare R. Coronavirus pandemic could have caused 40 million deaths if left unchecked. [Internet]. 2020.  
<https://www.imperial.ac.uk/news/196496/coronavirus-pandemic-could-have-caused-40/>
  8. Lewnard JA, Lo NC. Scientific and ethical basis for social-distancing interventions against COVID-19. *Lancet Infect Dis*. doi:10.1016/S1473-3099(20)30190-0
  9. Hawryluck L, Gold WL, Robinson S, Pogorski S, Sandro G, Rima S. SARS Control and Psychological Effects of Quarantine, Toronto, Canada. *Emerg Infect Dis*. 2004;10(7):1206-1212.
  10. Gallè F, Sabella E, Da Molin G, et al. Understanding Knowledge and Behaviors Related to CoViD-19 Epidemic in Italian Undergraduate Students: The EPICO Study. *Int J Environ Res Public Health*. 2020;17(10):3481
  11. Williams SN, Armitage CJ, Dienes K. Public perceptions and experiences of social distancing and social isolation during the COVID-19 pandemic: A UK-based focus group study. *medRxiv Prepr*. Published online 2020.  
doi:10.1101/2020.04.10.20061267
  12. Feuer W. Worldwide coronavirus cases top 200,000, doubling in two weeks. [Internet]. 2020 <https://www.cnbc.com/2020/03/18/worldwide-coronavirus-cases-top-200000-for-the-first-time.html>
  13. Flaxman, S., Mishra, S., Gandy, A. *et al*. Estimating the effects of non-pharmaceutical interventions on COVID-19 in Europe. *Nature* (2020). <https://doi.org/10.1038/s41586-020-2405-7>
  14. World Health Organization. *Overview of Public Health and Social Measures in the Context of COVID-19: Interim Guidance*. [Internet]. 2020  
<https://apps.who.int/iris/handle/10665/332115>.
  15. Akiyama MJ, Spaulding AC, Rich JD. Flattening the Curve for Incarcerated Populations — Covid-19 in Jails and Prisons. *N Engl J Med*. 2020;382(22):2075-2077.
  16. Chowdhury A, Kabir K, Tanimoto J, et al. How quarantine and social distancing policy can suppress the outbreak of novel coronavirus in developing or under poverty level countries: a mathematical and statistical analysis. 04 April 2020, PREPRINT (Version 1) available at Research Square [[+https://doi.org/10.21203/rs.3.rs-](https://doi.org/10.21203/rs.3.rs-)

- 20294/v1+]
17. Hick JL, Biddinger PD. Novel Coronavirus and Old Lessons - Preparing the Health System for the Pandemic. *N Engl J Med*. 2020;382(20):e55.
  18. Ahmed F, Zviedrite N, Uzicanin A. Effectiveness of workplace social distancing measures in reducing influenza transmission: a systematic review. *BMC Public Health*. 2018;18(1):518.
  19. Mal P, Suneel P, Shomeeta P. Social distancing: A non-pharmacological intervention for COVID-19. *J Pak Med Assoc*. 2020;(0):1.
  20. Kar SK, Arafat SMY, Sharma P, Dixit A, Marthoenis M, Kabir R. COVID-19 pandemic and addiction: Current problems and future concerns. *Asian J Psychiatr*. 2020;51:102064.
  21. Harris M, Ghebreyesus, T, Ryan M, et al. [Internet]. 2020 [https://web.archive.org/web/20200325084602/https://www.who.int/docs/default-source/coronaviruse/transcripts/who-audio-emergencies-coronavirus-press-conference-full-20mar2020.pdf?sfvrsn=1eafbff\\_0](https://web.archive.org/web/20200325084602/https://www.who.int/docs/default-source/coronaviruse/transcripts/who-audio-emergencies-coronavirus-press-conference-full-20mar2020.pdf?sfvrsn=1eafbff_0)
  22. Johnson CY. SLFA. Social distancing could buy U.S. valuable time against coronavirus. [Internet]. 2020 <https://www.washingtonpost.com/health/2020/03/10/social-distancing-coronavirus/>. Published 2020.
  23. Rocklöv J, Sjödin H, Wilder-Smith A. COVID-19 outbreak on the Diamond Princess cruise ship: estimating the epidemic potential and effectiveness of public health countermeasure. *J Travel Med*. 2020;27(3). doi:<https://doi.org/10.1093/jtm/taaa030>
  24. Sjödin H, Wilder-Smith A, Osman S, Farooq Z, Rocklöv J. Only strict quarantine measures can curb the coronavirus disease (COVID-19) outbreak in Italy, 2020. *Eurosurveillance*. 2020;25(13).
  25. World Health Organisation. Coronavirus disease (COVID-19) advice for the public. [Internet]. 2020 <https://www.who.int/emergencies/diseases/novel-coronavirus-2019/advice-for-public>
  26. Park M, Cook AR, Lim J, Sun Y, Dickens B. A Systematic Review of COVID-19 Epidemiology Based on Current Evidence. *J Clin Med*. 2020;9(4):967.
  27. Harapan H, Itoh N, Yufika A, et al. The COVID-19 pandemic calls for spatial distancing and social closeness: not for social distancing! *J Infect Public Health*. 2020;13(5):667-673.
  28. Lin C, Ye R, Xia YL. A meta-analysis to evaluate the effectiveness of real-time PCR

- 1  
2  
3 for diagnosing novel coronavirus infections. *Genet Mol Res*. 2015;14(4):15634-15641.
- 4  
5 29. Viner RM, Russell S, Croker H, et al. School closure and management practices during  
6 coronavirus outbreaks including COVID-19: a rapid systematic review. *Lancet Child*  
7 *Adolesc Heal*. 2020;4(5):397-404.
- 8  
9  
10 30. Brooks SK, Webster RK, Smith LE, et al. The psychological impact of quarantine and  
11 how to reduce it: rapid review of the evidence. *Lancet*. 2020;395(10227):912-920.
- 12  
13 31. Webster RK, Brooks SK, Smith LE, Woodland L, Wessely S, James R. How to  
14 improve adherence with quarantine: Rapid review of the evidence. *medRxiv Prepr*.  
15 Published online 2020. doi:10.1101/2020.03.17.20037408
- 16  
17  
18 32. Mahtani KR, Heneghan C, Aronson JK. What is the evidence for social distancing  
19 during global pandemics? A rapid summary of current knowledge. [Internet]. 2020.  
20 [https://www.phc.ox.ac.uk/files/covid-19-evidence-service/what-is-the-evidence-for-](https://www.phc.ox.ac.uk/files/covid-19-evidence-service/what-is-the-evidence-for-social-distancing-during-global-pandemics-final-1.pdf/view)  
21 [social-distancing-during-global-pandemics-final-1.pdf/view](https://www.phc.ox.ac.uk/files/covid-19-evidence-service/what-is-the-evidence-for-social-distancing-during-global-pandemics-final-1.pdf/view)
- 22  
23  
24 33. Rashid H, Ridda I, King C et al. Evidence compendium and advice on social  
25 distancing and other related measures for response to an influenza pandemic. *Paediatr*  
26 *Respir Rev*. 2015;16(2):119-126.
- 27  
28  
29 34. Fong M, Gao Hi, Wong J, et al. Nonpharmaceutical Measures for Pandemic Influenza  
30 in Nonhealthcare Settings-Social Distancing Measures. *Emerg Infect Dis*.  
31 2020;26(5):976-984.
- 32  
33  
34 35. Ferguson N, Laydon D, Nedjati-Gilani G, et al. Report 9 - Impact of non-  
35 pharmaceutical interventions (NPIs) to reduce COVID-19 mortality and healthcare  
36 demand. [Internet]. 2020 [https://www.imperial.ac.uk/mrc-global-infectious-disease-](https://www.imperial.ac.uk/mrc-global-infectious-disease-analysis/covid-19/report-9-impact-of-npis-on-covid-19/)  
37 [analysis/covid-19/report-9-impact-of-npis-on-covid-19/](https://www.imperial.ac.uk/mrc-global-infectious-disease-analysis/covid-19/report-9-impact-of-npis-on-covid-19/)
- 38  
39  
40 36. Lai S, Ruktanonchai NW, Zhou L, et al. Effect of non-pharmaceutical interventions for  
41 containing the COVID-19 outbreak in China.  
42 *medRxiv* 2020.03.03.20029843; doi: <https://doi.org/10.1101/2020.03.03.20029843>
- 43  
44  
45 37. Bayham J, Fenichel E. Impact of school closures for COVID-19 on the US health-care  
46 workforce and net mortality: a modelling study. *Lancet Public Heal*. 2020;5:e271-  
47 e278.
- 48  
49  
50 38. Hellewell J, Abbott S, Gimma A, et al. Feasibility of controlling COVID-19 outbreaks  
51 by isolation of cases and contacts. *Lancet Glob Heal*. 2020;8(4):e488-e496.
- 52  
53  
54 39. Prem K, Liu Y, Russell T, et al. The effect of control strategies to reduce social mixing  
55 on outcomes of the COVID-19 epidemic in Wuhan, China: a modelling study. *Lancet*  
56 *Public Heal*. 2020;5:e261-e270.
- 57  
58  
59  
60

- 1
  - 2
  - 3
  - 4
  - 5
  - 6
  - 7
  - 8
  - 9
  - 10
  - 11
  - 12
  - 13
  - 14
  - 15
  - 16
  - 17
  - 18
  - 19
  - 20
  - 21
  - 22
  - 23
  - 24
  - 25
  - 26
  - 27
  - 28
  - 29
  - 30
  - 31
  - 32
  - 33
  - 34
  - 35
  - 36
  - 37
  - 38
  - 39
  - 40
  - 41
  - 42
  - 43
  - 44
  - 45
  - 46
  - 47
  - 48
  - 49
  - 50
  - 51
  - 52
  - 53
  - 54
  - 55
  - 56
  - 57
  - 58
  - 59
  - 60
40. Koo JR, Cook AR, Park M, et al. Interventions to mitigate early spread of SARS-CoV-2 in Singapore: a modelling study [published correction appears in *Lancet Infect Dis*. 2020 May;20(5):e79]. *Lancet Infect Dis*. 2020;20(6):678-688.
41. Tang B, Xia F, Tang S, et al. The effectiveness of quarantine and isolation determine the trend of the COVID-19 epidemics in the final phase of the current outbreak in China. *Int J Infect Dis*. 2020;95:288-293.
42. Tang B, Wang X, Li Q, et al. Estimation of the Transmission Risk of the 2019-nCoV and Its Implication for Public Health Interventions. *J Clin Med*. 2020;9(2):462.
43. Panovska-Griffiths J. Can mathematical modelling solve the current Covid-19 crisis? *BMC Public Health*. 2020;20(1):551.
44. Pan D, Sze S, Minhas JS, et al. The impact of ethnicity on clinical outcomes in COVID-19: A systematic review. *EClinicalMedicine*. Published online June 2020:100404.
45. Chu DK, Akl EA, Duda S, et al. Physical distancing, face masks, and eye protection to prevent person-to-person transmission of SARS-CoV-2 and COVID-19: a systematic review and meta-analysis. *Lancet*. 2020;395(10242):1973-1987.
46. Nussbaumer-Streit B, Mayr V, Dobrescu A, et al. Quarantine alone or in combination with other public health measures to control COVID-19: a rapid review. *Cochrane database Syst Rev*. 2020;4:CD013574.
47. Jefferson T, Del Mar C, Dooley L, et al. Physical interventions to interrupt or reduce the spread of respiratory viruses. *Cochrane database Syst Rev*. 2011;(7). doi:10.1002/14651858.CD006207.pub4
48. University of Michigan. Michigan Medicine projections show aggressive social distancing will dramatically reduce the peak number of hospitalized COVID-19 patients. [Internet]. 2020 <https://www.uofmhealth.org/news/archive/202003/michigan-medicine-projections-show-aggressive-social>
49. Shamseer L, Moher D, Clarke M, et al. Preferred reporting items for systematic review and meta-analysis protocols (PRISMA-P) 2015: elaboration and explanation. *Br Med J*. 2015;349(jan02 1):g7647-g7647.
50. Higgins JPT, Thomas J, Chandler J, et al. *Cochrane Handbook for Systematic Reviews of Interventions*. Wiley; 2019.
51. Katcher BS. *Medline: A Guide to Effective Searching in PubMed & Other Interfaces*. The Ashbury Press; 2006.
52. Moher D, Liberati A, Tetzlaff J, Altman DG. Preferred reporting items for systematic

- 1  
2  
3 reviews and meta-analyses: The PRISMA statement. *BMJ*. 2009;339(7716):332-336.  
4  
5 53. Wells G, Shea B, O'Connell D, et al. The Newcastle-Ottawa Scale (NOS) for assessing  
6 the quality of nonrandomised studies in meta-analyses. [Internet]. 2019  
7 [http://www.ohri.ca/programs/clinical\\_epidemiology/oxford.asp](http://www.ohri.ca/programs/clinical_epidemiology/oxford.asp)  
8  
9  
10 54. Khan SK ter RGPJNJKJ. *Stage II Conducting the Review: Phase 5: Study Quality*  
11 *Assessment*. In: Khan SK, Ter Riet G, Glanville J, Sowden AJ, Kleijnen J, Eds.  
12 *Undertaking Systematic Reviews of Research on Effectiveness. CRD's Guidance for*  
13 *Carrying out or Commissioning Reviews CRD Report No 4*. 2nd ed. University of  
14 York; 2000.  
15  
16  
17  
18 55. Guyatt GH, Oxman AD, Vist GE, et al. GRADE: an emerging consensus on rating  
19 quality of evidence and strength of recommendations. *BMJ*. 2008;336(7650):924-926.  
20  
21  
22 56. Borenstein M. *Common Mistakes in Meta-Analysis and How to Avoid Them*. USA:  
23 Biostat, Inc; 2019.  
24  
25  
26 57. Sterne J, Egger M, Moher D. *Addressing Reporting Biases*. Wiley; 2008.  
27  
28 58. Egger M, Smith GD, Schneider M, Minder C. Bias in meta-analysis detected by a  
29 simple, graphical test. *BMJ*. 1997;315(7109):629-634.  
30  
31 59. Peters JL, Sutton AJ, Jones DR, Abrams KR, Rushton L, Moreno SG. Assessing  
32 publication bias in meta-analyses in the presence of between-study heterogeneity. *J R*  
33 *Stat Soc Ser A (Statistics Soc)*. 2010;173(3):575-591. doi:10.1111/j.1467-  
34 985X.2009.00629.x  
35  
36  
37 60. Jackson D. The implications of publication bias for meta-analysis' other parameter.  
38 *Stat Med*. 2006;25(17):2911-2921. doi:10.1002/sim.2293  
39  
40  
41 61. Peters JL, Sutton AJ, Jones DR et al. Performance of the trim and fill method in the  
42 presence of publication bias and between-study heterogeneity. *Stat Med*.  
43 2007;26(25):4544-4562.  
44  
45  
46 62. Terrin N, Schmid CH, Lau J, Olkin I. Adjusting for publication bias in the presence of  
47 heterogeneity. *Stat Med*. 2003;22(13):2113-2126.  
48  
49  
50 63. Borenstein M, Hedges L, Higgins J et al. *Introduction to Meta-Analysis*. Wiley; 2009.  
51  
52 64. Rodgers M, Sowden A, Petticrew M, et al. Testing Methodological Guidance on the  
53 Conduct of Narrative Synthesis in Systematic Reviews. *Evaluation*. 2009;15(1):49-73.  
54  
55 65. Pollock AM, Roderick P, Cheng K, Pankhania B. Covid-19: Why is the UK  
56 government ignoring WHO's advice? *Br Med J*. 2020;368.  
57  
58 66. Regmi K, Gilbert R, Thunhurst C. How can health systems be strengthened to control  
59 and prevent an Ebola outbreak? A narrative review. *Infect Ecol Epidemiol*.  
60

1  
2  
3 2015;5(1):28877.  
4  
5

6 **Additional file**  
7

8 **Additional file 1:** PRISMA checklist.  
9  
10  
11  
12  
13  
14  
15  
16  
17  
18  
19  
20  
21  
22  
23  
24  
25  
26  
27  
28  
29  
30  
31  
32  
33  
34  
35  
36  
37  
38  
39  
40  
41  
42  
43  
44  
45  
46  
47  
48  
49  
50  
51  
52  
53  
54  
55  
56  
57  
58  
59  
60

For peer review only

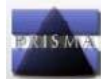

### Additional file 1. PRISMA 2009 Checklist

Impact of non-pharmaceutical interventions for reducing transmission of coronavirus disease 2019 [COVID-19]: A systematic review and meta-analysis protocol

| Section/topic             | # | Checklist item                                                                                                                                                                                                                                                                                              | Reported on page # | Notes                                                                                                                                                                                                 |
|---------------------------|---|-------------------------------------------------------------------------------------------------------------------------------------------------------------------------------------------------------------------------------------------------------------------------------------------------------------|--------------------|-------------------------------------------------------------------------------------------------------------------------------------------------------------------------------------------------------|
| <b>TITLE</b>              |   |                                                                                                                                                                                                                                                                                                             |                    |                                                                                                                                                                                                       |
| Title                     | 1 | Identify the report as a systematic review, meta-analysis, or both.                                                                                                                                                                                                                                         | 2                  | Title page                                                                                                                                                                                            |
| <b>ABSTRACT</b>           |   |                                                                                                                                                                                                                                                                                                             |                    |                                                                                                                                                                                                       |
| Structured summary        | 2 | Provide a structured summary including, as applicable: background; objectives; data sources; study eligibility criteria, participants, and interventions; study appraisal and synthesis methods; results; limitations; conclusions and implications of key findings; systematic review registration number. | 2                  |                                                                                                                                                                                                       |
| <b>INTRODUCTION</b>       |   |                                                                                                                                                                                                                                                                                                             |                    |                                                                                                                                                                                                       |
| Rationale                 | 3 | Describe the rationale for the review in the context of what is already known.                                                                                                                                                                                                                              | 3-6                |                                                                                                                                                                                                       |
| Objectives                | 4 | Provide an explicit statement of questions being addressed with reference to participants, interventions, comparisons, outcomes, and study design (PICOS).                                                                                                                                                  | 6                  |                                                                                                                                                                                                       |
| <b>METHODS</b>            |   |                                                                                                                                                                                                                                                                                                             |                    |                                                                                                                                                                                                       |
| Protocol and registration | 5 | Indicate if a review protocol exists, if and where it can be accessed (e.g., Web address), and, if available, provide registration information including registration number.                                                                                                                               | Not registered     | Refer to the recently published preprint study protocol:<br><a href="https://www.medrxiv.org/content/10.1101/2020.06.13.20130294v1">https://www.medrxiv.org/content/10.1101/2020.06.13.20130294v1</a> |
| Eligibility criteria      | 6 | Specify study characteristics (e.g., PICOS, length of follow-up) and report characteristics (e.g., years considered, language, publication status) used as criteria for eligibility, giving rationale.                                                                                                      | 7                  |                                                                                                                                                                                                       |
| Information sources       | 7 | Describe all information sources (e.g., databases with dates of coverage, contact with study authors to identify additional studies) in the search and date last searched.                                                                                                                                  | 7                  |                                                                                                                                                                                                       |
| Search                    | 8 | Present full electronic search strategy for at least one database, including any limits used, such that it could be repeated.                                                                                                                                                                               | 9-10               |                                                                                                                                                                                                       |
| Study selection           | 9 | State the process for selecting studies (i.e., screening, eligibility, included in systematic review, and, if applicable, included in the meta-analysis).                                                                                                                                                   | 11                 |                                                                                                                                                                                                       |



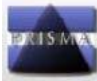

### Additional file 1. PRISMA 2009 Checklist

## Impact of non-pharmaceutical interventions for reducing transmission of coronavirus disease 2019 [COVID-19]: A systematic review and meta-analysis protocol

|                                    |    |                                                                                                                                                                                                                        |    |  |
|------------------------------------|----|------------------------------------------------------------------------------------------------------------------------------------------------------------------------------------------------------------------------|----|--|
| Data collection process            | 10 | Describe method of data extraction from reports (e.g., piloted forms, independently, in duplicate) and any processes for obtaining and confirming data from investigators.                                             | 13 |  |
| Data items                         | 11 | List and define all variables for which data were sought (e.g., PICOS, funding sources) and any assumptions and simplifications made.                                                                                  | 7  |  |
| Risk of bias in individual studies | 12 | Describe methods used for assessing risk of bias of individual studies (including specification of whether this was done at the study or outcome level), and how this information is to be used in any data synthesis. | 10 |  |
| Summary measures                   | 13 | State the principal summary measures (e.g., risk ratio, difference in means).                                                                                                                                          | 12 |  |
| Synthesis of results               | 14 | Describe the methods of handling data and combining results of studies, if done, including measures of consistency (e.g., $I^2$ ) for each meta-analysis.                                                              | 12 |  |

Page 1 of 2

| Section/topic                 | #  | Checklist item                                                                                                                                                                                           | Reported on page # | Notes |
|-------------------------------|----|----------------------------------------------------------------------------------------------------------------------------------------------------------------------------------------------------------|--------------------|-------|
| Risk of bias across studies   | 15 | Specify any assessment of risk of bias that may affect the cumulative evidence (e.g., publication bias, selective reporting within studies).                                                             | 10                 |       |
| Additional analyses           | 16 | Describe methods of additional analyses (e.g., sensitivity or subgroup analyses, meta-regression), if done, indicating which were pre-specified.                                                         | 13                 |       |
| <b>RESULTS</b>                |    |                                                                                                                                                                                                          |                    |       |
| Study selection               | 17 | Give numbers of studies screened, assessed for eligibility, and included in the review, with reasons for exclusions at each stage, ideally with a flow diagram.                                          | NA                 |       |
| Study characteristics         | 18 | For each study, present characteristics for which data were extracted (e.g., study size, PICOS, follow-up period) and provide the citations.                                                             | NA                 |       |
| Risk of bias within studies   | 19 | Present data on risk of bias of each study and, if available, any outcome level assessment (see item 12).                                                                                                | NA                 |       |
| Results of individual studies | 20 | For all outcomes considered (benefits or harms), present, for each study: (a) simple summary data for each intervention group (b) effect estimates and confidence intervals, ideally with a forest plot. | NA                 |       |
| Synthesis of results          | 21 | Present results of each meta-analysis done, including confidence intervals and measures of consistency.                                                                                                  | NA                 |       |
| Risk of bias across studies   | 22 | Present results of any assessment of risk of bias across studies (see Item 15).                                                                                                                          | NA                 |       |



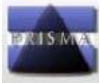

**Additional file 1. PRISMA 2009 Checklist**

Impact of non-pharmaceutical interventions for reducing transmission of coronavirus disease 2019 [COVID-19]: A systematic review and meta-analysis protocol

|                     |    |                                                                                                                                                                                      |    |  |
|---------------------|----|--------------------------------------------------------------------------------------------------------------------------------------------------------------------------------------|----|--|
| Additional analysis | 23 | Give results of additional analyses, if done (e.g., sensitivity or subgroup analyses, meta-regression [see Item 16]).                                                                | NA |  |
| <b>DISCUSSION</b>   |    |                                                                                                                                                                                      |    |  |
| Summary of evidence | 24 | Summarize the main findings including the strength of evidence for each main outcome; consider their relevance to key groups (e.g., healthcare providers, users, and policy makers). | 14 |  |
| Limitations         | 25 | Discuss limitations at study and outcome level (e.g., risk of bias), and at review-level (e.g., incomplete retrieval of identified research, reporting bias).                        | NA |  |
| Conclusions         | 26 | Provide a general interpretation of the results in the context of other evidence, and implications for future research.                                                              | 14 |  |
| <b>FUNDING</b>      |    |                                                                                                                                                                                      |    |  |
| Funding             | 27 | Describe sources of funding for the systematic review and other support (e.g., supply of data); role of funders for the systematic review.                                           | 15 |  |

From: Moher D, Liberati A, Tetzlaff J, Altman DG, The PRISMA Group (2009). Preferred Reporting Items for Systematic Reviews and Meta-Analyses: The PRISMA Statement. PLoS Med 6(7): e1000097. doi:10.1371/journal.pmed1000097

For more information, visit: [www.prisma-statement.org](http://www.prisma-statement.org).

# BMJ Open

## Impact of non-pharmaceutical interventions for reducing transmission of coronavirus disease 2019 [COVID-19]: A systematic review and meta-analysis protocol

|                                 |                                                                                                                                                                        |
|---------------------------------|------------------------------------------------------------------------------------------------------------------------------------------------------------------------|
| Journal:                        | <i>BMJ Open</i>                                                                                                                                                        |
| Manuscript ID                   | bmjopen-2020-041383.R2                                                                                                                                                 |
| Article Type:                   | Protocol                                                                                                                                                               |
| Date Submitted by the Author:   | 15-Sep-2020                                                                                                                                                            |
| Complete List of Authors:       | Regmi, Krishna; University of Bedfordshire, Institute for Health Research, Faculty of Health and Social Sciences<br>Lwin, Cho ; University of Dental Medicine Mandalay |
| <b>Primary Subject Heading</b>: | Infectious diseases                                                                                                                                                    |
| Secondary Subject Heading:      | Public health, Research methods                                                                                                                                        |
| Keywords:                       | Infection control < INFECTIOUS DISEASES, Public health < INFECTIOUS DISEASES, EPIDEMIOLOGY, INFECTIOUS DISEASES, COVID-19                                              |
|                                 |                                                                                                                                                                        |

SCHOLARONE™  
Manuscripts



I, the Submitting Author has the right to grant and does grant on behalf of all authors of the Work (as defined in the below author licence), an exclusive licence and/or a non-exclusive licence for contributions from authors who are: i) UK Crown employees; ii) where BMJ has agreed a CC-BY licence shall apply, and/or iii) in accordance with the terms applicable for US Federal Government officers or employees acting as part of their official duties; on a worldwide, perpetual, irrevocable, royalty-free basis to BMJ Publishing Group Ltd ("BMJ") its licensees and where the relevant Journal is co-owned by BMJ to the co-owners of the Journal, to publish the Work in this journal and any other BMJ products and to exploit all rights, as set out in our [licence](#).

The Submitting Author accepts and understands that any supply made under these terms is made by BMJ to the Submitting Author unless you are acting as an employee on behalf of your employer or a postgraduate student of an affiliated institution which is paying any applicable article publishing charge ("APC") for Open Access articles. Where the Submitting Author wishes to make the Work available on an Open Access basis (and intends to pay the relevant APC), the terms of reuse of such Open Access shall be governed by a Creative Commons licence – details of these licences and which [Creative Commons](#) licence will apply to this Work are set out in our licence referred to above.

Other than as permitted in any relevant BMJ Author's Self Archiving Policies, I confirm this Work has not been accepted for publication elsewhere, is not being considered for publication elsewhere and does not duplicate material already published. I confirm all authors consent to publication of this Work and authorise the granting of this licence.

1  
2  
3 **Impact of non-pharmaceutical interventions for reducing transmission of coronavirus**  
4 **disease 2019 [COVID-19]: A systematic review and meta-analysis protocol**  
5  
6  
7  
8  
9  
10  
11  
12

13 Krishna Regmi<sup>1</sup>, Cho Mar Lwin<sup>2</sup>

14  
15 <sup>1</sup>Institute for Health Research, University of Bedfordshire, Luton, UK

16  
17 <sup>2</sup>University of Medicine Mandalay, Mandalay, Myanmar  
18  
19  
20  
21  
22  
23  
24  
25  
26  
27  
28  
29  
30

31 **Correspondence to**

32 Dr Krishna Regmi

33 Institute for Health Research

34 University of Bedfordshire

35 Luton LU1 3JU

36 United Kingdom

37  
38  
39  
40  
41 Email: [Krishna.r.regmi@gmail.com](mailto:Krishna.r.regmi@gmail.com)  
42  
43  
44  
45  
46  
47  
48  
49  
50  
51  
52

53 **Keywords:** Non-pharmaceutical interventions, Social distancing, COVID-19, Prevention,  
54 Control, Systematic review  
55  
56  
57  
58  
59  
60

## Impact of non-pharmaceutical interventions for reducing transmission of coronavirus disease 2019 [COVID-19]: A systematic review and meta-analysis protocol

### Abstract

**Introduction:** Implementing non-pharmaceutical interventions (NPIs) protect the public from coronavirus disease 2019 (COVID-19). However, the impact of NPIs has been inconsistent and remains unclear. This study, therefore, aims to measure the impact of major NPIs (social distancing, social isolation and quarantine) on reducing COVID-19 transmission.

**Methods and analysis:** We will conduct a systematic review (SR) and meta-analysis (MA) research of both randomised and non-randomised controlled trials. We will undertake a systematic search of: MEDLINE, EMBASE, Allied & Complementary Medicine, COVID-19 Research, WHO database on COVID-19, ClinicalTrials.Gov for clinical trials on COVID-19, Cochrane Resources on Coronavirus (COVID-19), Oxford COVID-19 Evidence Service, Google Scholar for published and unpublished literatures on COVID-19 including pre-print engines such as medRxiv, bioRxiv, LitCovid and SSRN for unpublished studies on COVID-19, and will be reported in accordance with PRISMA. Outcomes of interest for impact analysis will include the reduction of COVID-19 transmission, avoiding crowds and restricting movement, isolating ill and psychological impacts. The Preferred Reporting Items for Systematic Review and Meta-Analysis Protocols (PRISMA-P) checklist has been used for this protocol. For quality of included studies, we will use the Cochrane Collaboration's tool for assessing risk of bias for randomised controlled trials and the Newcastle Ottawa scale for observational studies. The GRADE approach will grade the certainty of the evidence for all outcome measures across studies. Random-effects model for meta-analysis will measure the effect size of NPIs or the strengths of relationships. For quantitative data, risk ratio or odds ratio, absolute risk difference (for dichotomous outcome data), or mean difference or standardised mean difference (for continuous data) and their 95% confidence intervals we will be calculated. Where statistical pooling is not possible, a narrative synthesis, will be conducted for the included studies. To assess the heterogeneity of effects,  $I^2$  together with the observed effects will be evaluated to provide the true effects in the analysis.

**Ethics and dissemination:** Ethics approval and consent will not be required for this systematic literature review, as it does not involve human participation. We will disseminate the study findings as follows: publishing at least one paper in peer-reviewed journals, and an

1  
2  
3 abstract will be presented at suitable national/international conferences or workshops. We  
4 will also share important information with public health authorities as well as with the World  
5 Health Organization (WHO). In addition, we may post the submitted manuscript under  
6 review to medRxiv, or other relevant pre-print servers.  
7  
8  
9

10  
11  
12 **Registration:** International Prospective Register of Systematic Reviews (PROSPERO)  
13 registration number CRD42020207338.  
14  
15

### 16 17 **Strengths and limitations of this study**

- 18 • To the best of our knowledge, this study is the first SR to measure the impact of NPIs –  
19 social distancing, isolation and quarantine – on reducing COVID-19 transmission.
- 20 • This study will offer the highest level of evidence to assist policy-makers and researchers  
21 in synthesising a large and complex literature, drawing a broader framework.
- 22 • This protocol reduces the possibility of duplication, provides transparency to the methods  
23 and procedures used, minimises potential biases and allows peer-review.
- 24 • This research is not externally funded, and therefore time and resource will be  
25 constrained.
- 26 • If included studies vary in sample size, quality and population, they may be open to bias,  
27 and the heterogeneity of data will preclude a meaningful meta-analysis to measure the  
28 effects of specific NPIs.  
29  
30  
31  
32  
33  
34  
35  
36  
37  
38  
39

### 40 **Introduction**

41 Coronavirus disease 2019 (COVID-19; caused by severe acute respiratory syndrome  
42 coronavirus 2 [SARS-CoV-2]) emerged in Wuhan, China in December 2019, and has been  
43 posing a global public health threat. On March 11, 2020, WHO declared the COVID-19  
44 outbreak a pandemic.<sup>1</sup> At the time of writing (September 12, 2020), the WHO COVID-19  
45 Situation Dashboard reports that this virus has already affected 216 countries, areas or  
46 territories with 28,040,853 confirmed cases of COVID-19 and 906,092 deaths; a fatality rate  
47 of approximately 4% (3.23%).<sup>2</sup>  
48  
49  
50  
51  
52

53 Based on reported cases, approximately 1:10 reported infections were among  
54 healthcare professionals, e.g. medical doctors, nurses.<sup>3</sup> We have seen disproportionate  
55 numbers of black, Asian and minority ethnic (BAME) doctors and other healthcare  
56 professionals die from COVID-19. A study conducted by Cook and Lennane reported  
57  
58  
59  
60

1  
2  
3 that in the UK National Health Service (NHS), it is estimated 21% of all staff are BAME,  
4 whereas 63% of healthcare professionals who died were BAME.<sup>4</sup> A recent UK government  
5 review<sup>5</sup> highlighted that the highest age-standardised diagnosis rates of COVID-19 per  
6 100,000 population were in people of BAME groups (486 female and 649 male) and the  
7 lowest were in White people (220 female and 224 male). Accounting for the effect of sex,  
8 age, deprivation and region, Bangladeshi people had about twice the risk of death compared  
9 with White British. Similarly, Chinese, Indian, Pakistani, other Asian, Caribbean and other  
10 Black ethnicity had between 10 and 50% higher risk of death compared to White British. In  
11 fact, this is the opposite of observations in previous years, when all-cause mortality rates  
12 were lower in BAME.<sup>3,5</sup>

13  
14 Similarly, the COVID-19 mortality rate in the USA for African-Americans was 2.4-  
15 2.7 times more than for White individuals.<sup>3</sup> However, death rates are not consistent across  
16 these groups. Inequalities in COVID-19 mortalities are rife, which is most recently shown by  
17 Public Health England.<sup>6</sup> Several factors were identified as risks for COVID-19, e.g.  
18 ethnicity, age, sex, co-morbidities (diabetes, renal conditions), occupation, socio-economic  
19 status, and multifamily and multigenerational households.<sup>6-8</sup>

20  
21 Recent data from Johns Hopkins University reported that global COVID-19 deaths  
22 have surpassed 890,000.<sup>9</sup> Imperial College London highlights that this outbreak could kill 40  
23 million people this year without public health measures (e.g. case finding, contact tracing and  
24 testing, and strict quarantine).<sup>7</sup> Evidence suggests that the number of cases reported would  
25 possibly “represent an underestimation of the true burden due to lack of surveillance and  
26 diagnostic capacity”<sup>8</sup> as well as pharmaceuticals to manage severe COVID-19.<sup>10</sup>

27  
28 Several countries, including the United Kingdom (UK), United States of America  
29 (USA) and other European Union (EU) countries are adopting social distancing (SD) measure  
30 as a form of non-pharmaceutical or physical interventions to control COVID-19 by slowing  
31 down transmission of the virus and preventing associated illness and death.<sup>11</sup> SD is the new  
32 buzzword with the outbreak of coronavirus and COVID-19. In the literature, the term SD can  
33 have different meanings; for example, some considered it as strategy,<sup>12</sup> policy,<sup>13</sup> an approach  
34 to flatten the curve,<sup>14</sup> mitigation measure to increase physical distance or reduce frequency of  
35 congregation in socially dense community settings.<sup>15-17</sup> Flaxman et al.<sup>10</sup> defined SD as a  
36 measure to ban large gatherings and advise individuals not to socialise outside their  
37 households by closing borders, some public places, schools and universities;  
38 isolation/quarantine, physical distancing and room separation to isolate symptomatic  
39 individuals and their contacts; and large-scale lockdowns of populations by staying at least  
40

1  
2  
3 2m apart aiming to minimise mixing of infectious susceptible patients. This definition of SD,  
4 in fact, is very vague and includes interventions which are considered different to SD, e.g.  
5 quarantine including school closure and case findings.  
6  
7

8 For clarity, in this SR, the definition of SD (also called physical distancing) is  
9 considered as a set of NPIs intended to prevent spread of COVID-19 by maintaining physical  
10 distance between people and reducing the number of times people come into close  
11 contact.<sup>18,19</sup> This review focuses only on COVID-19/SARS-CoV-2 and three major NPIs,  
12 namely SD, isolation and quarantine. Isolation of cases refers to the separation of ill persons  
13 with contagious diseases from non-infected persons, either hospitalised (moderate or severe  
14 cases) to provide care, or in dedicated isolation facilities or at home (mild cases),<sup>20</sup> and  
15 quarantine is the restriction of persons who are presumed to have been exposed to a  
16 contagious disease but are not ill, either because they did not become infected or because they  
17 are still in the incubation period.<sup>21</sup> WHO recommends isolation, physical (social) distancing,  
18 contact tracing and quarantine of close contacts as the key measures to reduce COVID-19.<sup>22</sup>  
19  
20  
21  
22  
23  
24  
25  
26

27 A scoping search of MEDLINE was done on 9 September 2020 for publications  
28 entered by the end of August 2020 with the following terms: (“COVID-19” OR “SARS-  
29 CoV-2”) AND (“systematic review” OR “literature search” OR “meta-analysis” OR  
30 “evidence synthesis”) AND (“social distancing” OR “isolation” OR “quarantine”). It  
31 revealed some empirical research on COVID-19 from China, South Korea, the UK, the USA  
32 and other countries, but these are not systemically reviewed or synthesised well. Several  
33 rapid reviews and summaries have been covered on COVID-19 epidemiology,<sup>23,24</sup> the  
34 effectiveness of real-time PCR for diagnosis,<sup>25</sup> effects of school closure,<sup>26</sup> quarantine,<sup>27,28</sup>  
35 SD<sup>29</sup> (study primarily based on two previous reviews<sup>30,31</sup> on influenza from 2012 and 2018,  
36 respectively), and mathematical modelling studies incorporating the effect of SD.<sup>10,20,32–39</sup>  
37 These models would generally help to “predict epidemic curve representing the number of  
38 infections caused by the virus over time.”<sup>40</sup>  
39  
40  
41  
42  
43  
44  
45  
46  
47

48 Recently, some SRs and MAs have been conducted to investigate ethnicity and  
49 clinical outcomes.<sup>41</sup> Chu and colleagues<sup>42</sup> published a systematic review including physical  
50 distancing to investigate the optimum distance for avoiding person-to-person transmissions,  
51 focusing more on face masks and eye protection. Though their study was, perhaps, the first  
52 rapidly synthesised review, and identified 172 studies across 16 countries and six continents,  
53 none of the included studies were randomised controlled trials, therefore their findings might  
54 suffer from both recall and measurement biases. Cochrane further conducted three studies;  
55 First, a rapid review in 2020, involving 29 studies on COVID-19 from China, UK, South  
56  
57  
58  
59  
60



1  
2  
3 Korea and Japan.<sup>43</sup> Second, a rapid qualitative evidence synthesis conducted in 2020 capturing  
4 36 studies from Asia, Africa, Central and North America and Australia examining healthcare  
5 workers' adherence and enablers or challenges associated with infection control guidelines  
6 for respiratory infections. Another study examined 67 studies including RCTs and  
7 observational studies exploring the role of physical interventions for reducing the spread of  
8 respiratory viruses, and found no evidence regarding screening at entry ports and SD.<sup>44</sup>  
9

10  
11  
12  
13 Lewnard and Lo<sup>8</sup> and Michigan Medicine Projections<sup>45</sup> reported that combined NPIs  
14 using SD, isolation and quarantine, including workplace distancing, appeared effective in  
15 reducing COVID-19 compared to no interventions. This approach, however, reported  
16 considerable challenges, e.g. societal disruption, social isolation/rejection, mental stress and  
17 psychological trauma, lack of tests and testing facilities, poor contact tracing and lack of  
18 surveillance. No studies examined the combined effects of NPIs in reducing the transmission  
19 of COVID-19. This study, therefore, aims to measure the impact of NPIs on reducing  
20 COVID-19 transmission.  
21  
22  
23  
24  
25  
26  
27  
28

### 29 **Review question**

30 What has been the impact of NPIs – social distancing, quarantine and isolation – on reducing  
31 transmission of coronavirus disease 2019 [COVID-19]?  
32  
33  
34  
35

### 36 **Methods and designs**

37 This study will utilise a SR and MA, which will consider both randomised controlled trials  
38 and non-randomised trials (prospective and retrospective observational studies). The  
39 PRISMA-P checklist has been used in the preparation of this protocol.<sup>46</sup> In addition, we also  
40 completed a 27-item PRISMA checklist, which is included in the online supplementary file  
41 (Additional file 1).  
42  
43  
44  
45  
46  
47

### 48 **Criteria for considering studies for review**

#### 49 *Inclusion criteria*

- 50  
51 1. Types of participants – this review will consider all studies that involve human  
52 subjects of any age-gender, including ethnic (Black, Asian, White) and healthcare  
53 workers (medical doctors, nurses, allied healthcare professions) groups.  
54
- 55 2. Types of intervention – we will include research describing three major NPIs, e.g.  
56 social distance, isolation and quarantine focusing only COVID-19/SARS-CoV-2.  
57  
58  
59  
60

3. Types of outcome measure. Primary outcomes include: COVID-19; reducing the risk of transmission/infection of COVID-19; hospitalisation, ICU admissions, COVID-19 related complications, quality of life; and mortality and morbidity. Secondary outcomes include changes in social behaviour, e.g. social distancing by avoiding crowds, restricting movements, isolating ill patients and quarantine of exposed people.
4. Types of studies. No study design filter is added, and there is no limit on our search by language. To measure the impact of NPIs, this review considers all studies evaluating the effectiveness of NPIs relating to reducing the risk of transmission/infection of COVID-19. We include both randomised controlled trials and non-randomised controlled trials, e.g. cross-sectional, survey, case-control, randomised controlled trials, and observational studies (retrospective or prospective).

#### *Exclusion criteria*

1. Articles in narrative reviews, modelling studies, opinion pieces, letters, news, editorials, perspectives, commentaries, conference abstracts and other publications lacking primary data and/or poor methodological details.
2. Studies containing duplicate datasets.

#### **Search strategy to identify relevant studies**

We aim to undertake a systematic search of the following sources: MEDLINE, EMBASE, Allied & Complementary Medicine, COVID-19 Research, WHO database on COVID-19, ClinicalTrials.Gov for clinical trials on COVID-19, Cochrane Resources on Coronavirus (COVID-19), Oxford COVID-19 Evidence Service, Google Scholar for published and unpublished literatures on COVID-19 including pre-print engines such as medRxiv, bioRxiv, LitCovid and SSRN for unpublished studies on COVID-19 will be searched given the lags in publication. The literature search uses the following terms: “social distancing”, “quarantine”, “isolation”, “non-pharmacological interventions” combined with “COVID-19”. Primary search terms are non-pharmacological interventions or measures (all synonyms) and COVID-19 (all synonyms) using ‘Textword searching’ – searching for a word or phrase anywhere in the document, where the document is the citation (article title, journal name, author), not the full text of an article, and ‘Thesaurus (MeSH, Emtree) searching’, employing Boolean operators and truncations. The ‘Related Articles’ feature in PubMed will be consulted. Searches will also be supplemented by reviewing the reference lists (‘references of

1  
2  
3 references') of selected articles to find any other relevant papers. From the identified studies  
4 in the search, forward and backward citations will also be carried out to find potential studies  
5 reporting NPIs and reducing transmission of COVID-19 for the full texts. The literature  
6 search strategy was developed by KR in collaboration with departmental subject librarians  
7 from authors' universities, who were experienced in SRs, and subsequently refined ensuring  
8 its comprehensiveness. While piloting the search strategy, we followed these broad steps:  
9

- 10 • Tested out keywords and phrases in a MEDLINE database to see the number of hits  
11 returned, and assessed the degree of relevance;
- 12 • Reviewed some (e.g. five) papers including those marked 'highly cited' on COVID-  
13 19/SARS-CoV-2 that meet inclusion/exclusion criteria, where we looked at the terms  
14 used in the titles and abstracts for main concepts e.g. NPIs and COVID-19.
- 15 • Took notes of keywords supplied by authors and incorporated those into our strategy.
- 16 • Experimented with combinations of keywords using 'AND' (limits search) and 'OR'  
17 (expands search) operators.
- 18 • Looked at subject headings assigned for key papers and used them too.

19  
20  
21  
22  
23  
24  
25  
26  
27  
28  
29  
30  
31 A broad search strategy has been designed to maximise the level of sensitivity (or  
32 comprehensiveness) in searching,<sup>47</sup> and improve both *recall ratio* (number of relevant  
33 references retrieved divided by all of the relevant references) and *precision ratio* (number of  
34 relevant references retrieved divided by the number of references retrieved).<sup>48(p.34)</sup> Key terms  
35 for one MEDLINE are shown in Table 1.  
36  
37  
38  
39  
40  
41  
42  
43  
44  
45  
46  
47  
48  
49  
50  
51  
52  
53  
54  
55  
56  
57  
58  
59  
60

**Table 1.** Search strategy for MEDLINE

| Concepts          | Search terms in each concepts will be modified as needed for use in other databases                                                                                                                                                                                                                                                                                                                                                                                                                                                                                                                                                                                                                                                                                                                                                                                                                                                                                                                                                                                                                            |
|-------------------|----------------------------------------------------------------------------------------------------------------------------------------------------------------------------------------------------------------------------------------------------------------------------------------------------------------------------------------------------------------------------------------------------------------------------------------------------------------------------------------------------------------------------------------------------------------------------------------------------------------------------------------------------------------------------------------------------------------------------------------------------------------------------------------------------------------------------------------------------------------------------------------------------------------------------------------------------------------------------------------------------------------------------------------------------------------------------------------------------------------|
| <i>Concept #1</i> | <i>COVID-19</i>                                                                                                                                                                                                                                                                                                                                                                                                                                                                                                                                                                                                                                                                                                                                                                                                                                                                                                                                                                                                                                                                                                |
|                   | "covid 19 pandemic"[All Fields] OR "COVID19"[All Fields] OR "COVID-19"[All Fields] OR "COVID-2019"[All Fields] OR "2019-nCoV"[All Fields] OR "2019nCoV"[All Fields] OR "coronavirus infections"[All Fields] OR "coronavirus infections"[MeSH Terms] OR "coronavirus"[All Fields] OR "coronavirus"[All Fields] OR "coronavirus"[MeSH Terms] OR "coronavirus"[MeSH Terms] OR "Betacoronavirus"[MAJR] "SARS coronavirus2"[All Fields] "sars cov"[All Fields] OR "sars virus"[All Fields] OR "sars virus"[MeSH Terms] OR "SARS"[All Fields] OR "SARS2"[All Fields] OR "SARS-2"[All Fields] OR "SARScoronavirus 2"[All Fields] OR "SARScoronavirus2"[All Fields] OR "SARS-coronavirus-2"[All Fields] OR "SARS-CoV-2"[All Fields] OR "SARSCov2019*"[All Fields] OR "SARS-Cov2019*"[All Fields] OR "SARS-Cov-2019*"[All Fields] OR "severe acute respiratory syndrome coronavirus 2"[All Fields] OR "severe acute respiratory syndrome coronavirus 2"[Supplementary Concept] OR "Wuhan coronavirus"[All Fields] OR "Wuhan"[All Fields] AND ("coronavirus"[MeSH Terms] OR "coronavirus"[All Fields] OR "COVID-19"[nm]) |
| <i>Concept #2</i> | <i>Non-Pharmaceutical Interventions</i>                                                                                                                                                                                                                                                                                                                                                                                                                                                                                                                                                                                                                                                                                                                                                                                                                                                                                                                                                                                                                                                                        |
|                   | "social distancing"[TIAB] OR "cohorting"[All Fields] OR "community containment"[All Fields] OR "isolation strategy"[All Fields] OR "isolation"[All Fields] OR "patient isolation"[All Fields] OR "patient isolation"[MeSH Terms] OR "patient isolators"[All Fields] OR "patient isolators"[MeSH Terms] OR "physical contact"[All Fields] OR "physical distancing"[All Fields] OR "quarantine"[All Fields] OR "quarantines"[All Fields] OR "quarantine"[MeSH Terms] OR "social distance"[All Fields] OR "quarantines"[All Fields] OR "quarantined"[All Fields] OR "quarantining"[All Fields] OR "social distance"[MeSH Terms] OR "Social distancing"[All Fields] OR "Banning"[All Fields] OR "distancing"[All Fields]                                                                                                                                                                                                                                                                                                                                                                                           |
| <i>Concept #3</i> | <i>Reduce transmission</i>                                                                                                                                                                                                                                                                                                                                                                                                                                                                                                                                                                                                                                                                                                                                                                                                                                                                                                                                                                                                                                                                                     |

"reduce"[All Fields] OR "reduced"[All Fields] OR "reduces"[All Fields] OR "transmission"[MeSH Subheading] OR "transmission"[All Fields] OR "transmissions"[All Fields] OR "prevention and control"[Subheading] OR prevention[Text Word] OR "reduce infection"[All Fields] OR infect"[All Fields] OR "infectability"[All Fields] OR "infectable"[All Fields] OR "infectant"[All Fields] OR "infectants"[All Fields] OR "infected"[All Fields] OR "infecteds"[All Fields] OR "infectibility"[All Fields] OR "infectible"[All Fields] OR "infecting"[All Fields] OR "infection s"[All Fields] OR "infections"[MeSH Terms] OR "infections"[All Fields] OR "infection"[All Fields] OR "infective"[All Fields] OR "infectiveness"[All Fields] OR "infectives"[All Fields] OR "infectivities"[All Fields] OR "infects"[All Fields] OR "pathogenicity"[MeSH Subheading] OR "pathogenicity"[All Fields] OR "infectivity"[All Fields] OR "Coronavirus Infections/prevention and control"[MAJR] OR "Pandemics/prevention and control"[MAJR]

We combined these concepts (using AND), so all concepts are in the same references.

### **Selection of studies**

The citations identified will be imported into Mendeley Reference Manager (<https://www.mendeley.com/>). All studies emerging from the databases are screened in two stages: (i) screening of titles and abstracts by two reviewers against minimum inclusion criteria, and (ii) review of full text. We will use the standard PRISMA flow diagram to provide the study selection process.<sup>49</sup>

### **Quality assessment and risk of bias**

Quality of the included studies will be assessed using Cochrane Collaboration's tool for assessing risk of bias for randomised controlled trials and the Newcastle Ottawa scale (NOS) for non-randomised studies.<sup>50</sup> Where possible, we will analyse randomised (according to effectiveness of randomisation method, generation of allocation sequence, allocation concealment, blinding, and follow-up) and non-randomised studies (for presence of potential confounders for case-control and cohort studies), and a three-point checklist will be used for controlled before and after studies<sup>51</sup> separately. In NOS, "a 'star system' has been developed in which a study is judged on three broad perspectives: the selection of the study groups; the comparability of the groups; and the ascertainment of either the exposure or outcome of interest for case-control or cohort studies respectively".<sup>50</sup> Some items or questions in these

1  
2  
3 quality assessments e.g. blinded study, are irrelevant to social distancing studies; we therefore  
4 consider removing them. Risk of bias will be examined, as it provides variation,  
5 e.g. heterogeneity in results of studies included in the study. As Higgins et al.<sup>47</sup> argue,  
6 rigorously conducted studies in the SR would provide more truthful results, and the results  
7 from the studies of variable validity would give either false negative or false positive  
8 conclusions. In this study, the GRADE (Grading of Recommendations Assessment,  
9 Development and Evaluation) approach will be used to assess the certainty of the evidence –  
10 risk of bias across studies.<sup>52</sup>  
11  
12  
13  
14  
15  
16  
17

18  
19 Generally, the bias table provides the type of bias (e.g., selective reporting of outcomes,  
20 random sequence generation, allocation of concealment, blinding of participants, personnel  
21 and assessors, incomplete outcome data and other potential threats to validity) in each study.  
22 If, for example, most rows are unshaded then that is considered a low risk of bias, whereas if  
23 some rows are either partly-shaded or dark (risk of bias either unclear or high), this would  
24 provide relatively less confidence in the results.<sup>47</sup> A narrative synthesis will be conducted for  
25 all included studies. Included studies will be assessed by two authors (KR, CML) and the  
26 results will inform synthesis and interpretation of the findings. To facilitate comparison of  
27 appraisal processes, all reviewers will record the rationale for inclusion or exclusion, and  
28 discrepancies will be discussed and resolved by consensus.  
29  
30  
31  
32  
33  
34  
35  
36  
37

### 38 **Assessment of reporting biases**

39 Publication bias, often called reporting bias and dissemination bias, is the concern that studies  
40 reporting relatively large effects are more likely to be published than studies reporting  
41 smaller effects.<sup>53</sup> Similarly, published studies including multiple outcomes would be more  
42 likely to report the outcomes than if they showed statistically significant results.<sup>54</sup> We will  
43 use funnel plot to estimate the publication bias.<sup>55</sup> If meta-analysis had captured all relevant  
44 studies we would expect the funnel plot to be symmetric, i.e. we would expect studies to be  
45 dispersed equally on either side of the overall effect.<sup>53</sup> One approach to address publication  
46 bias is to follow the trim and fill procedures, i.e. assessing asymmetry or symmetry in the  
47 funnel plot if more than 10 eligible studies are identified.<sup>53(p.175)</sup> Trim and fill is a method  
48 which allows us to impute these studies, i.e. we determine where missing studies are likely to  
49 fall, add them to the analysis, and then recompute the combined effect. In any meta-analysis  
50 where the studies are pulled from journals or unpublished data in preprint servers, such as  
51 medRxiv, we need to be concerned about the potential impact of publication bias.<sup>56-59</sup> If the  
52  
53  
54  
55  
56  
57  
58  
59  
60

1  
2  
3 funnel plot is still asymmetric and implies potential bias after including these unpublished  
4 data, we use the Trim and Fill method to quantitatively assess the bias. The Trim and Fill  
5 method serves as a sensitivity analysis.<sup>58</sup> Specifically, if the smaller studies tend to have  
6 larger effects, and if this is actually due to publication bias, this method tells us what the  
7 effect size would be in the absence of bias.<sup>57,59</sup>  
8  
9  
10  
11  
12

### 13 **Data analysis and synthesis**

14  
15 For quantitative data, where possible, we will measure a risk ratio (RR) or odds ratio (OR),  
16 absolute risk difference (ARD) for dichotomous/categorical outcome data, and mean  
17 difference (MD) or standardised mean difference (SMD) will be calculated for continuous  
18 data, with their 95% confidence intervals (CIs) from the data generated by each included  
19 study.<sup>53</sup>  
20  
21  
22  
23

24 If sufficient data are available to make an inference to a universe of comparable  
25 studies, results from the comparable groups of studies will be pooled into the statistical  
26 random-effects model for meta-analysis to measure the effect size of NPIs on reducing  
27 transmission of COVID-19 or the strengths of relationships using the software  
28 Comprehensive Meta-Analysis (CMA, version 3. [https://www.meta-  
29 analysis.com/pages/new\\_v3.php?cart=BT2P4569026](https://www.meta-analysis.com/pages/new_v3.php?cart=BT2P4569026)). The purpose of using a random-effects  
30 model in the analysis is “to incorporate the assumption that the different studies are  
31 estimating different, yet related, intervention effects”.<sup>47</sup> To test the heterogeneity of effects in  
32 the included studies, we will use Higgins et al.’s  $I^2$  together with the observed effects to  
33 measure the true effects in the analysis.<sup>47</sup> The  $I^2$  test for heterogeneity is meant to evaluate  
34 whether there is variability across publications.  
35  
36  
37  
38  
39  
40  
41  
42

43 This will be computed as follows:

$$44 I^2 = \left( \frac{Q - df}{Q} \right) \times 100\%$$

45  
46  
47  
48  
49  
50  
51 Q-value (Cochran’s heterogeneity statistic) is the sum of the squared deviations of all  
52 effect sizes from the mean effect size and  $df$  indicates the degrees of freedom. We report the  
53 prediction interval. This speaks directly to the actual utility of the interventions, but provides  
54 the smallest and largest effect sizes associated with this intervention.<sup>60</sup> A rough guide, it is  
55 interpreted that: 0%-40% might not be important, 30%-60% may represent moderate  
56 heterogeneity, 50%-90% may represent substantial heterogeneity, and 75%-100%  
57  
58  
59  
60



1  
2  
3 considerable heterogeneity.<sup>47</sup> Generally, the importance of observed value of  $I^2$  on moderate  
4 and substantial heterogeneity depends on the magnitude and direction of effects as well as the  
5 strength of heterogeneity.<sup>47,60</sup> Where statistical pooling is not possible, a narrative synthesis  
6 is conducted for the included studies. For qualitative data, where meta-synthesis is possible,  
7 textual data is pooled using the JBI Qualitative Assessment and Review Instrument (JBI-  
8 QARI) and Narrative, Opinion and Text Assessment and Review Instrument (JBI-  
9 NOTARI).<sup>61</sup>

### 16 17 **Data extraction and data items**

18 Two reviewers independently extract descriptive data and data relevant to the quality of each  
19 study using the data extraction form. Data items i.e. source of study, eligibility, reasons for  
20 exclusion, methods (study design, duration), participants (number, setting, age-gender),  
21 intervention and comparator characteristics, results (number of participants, sample size, data  
22 for each intervention group, quantitative outcomes – mean, SDs, estimate effect), source of  
23 funding, ethics approval and study limitation will be extracted, based on the checklist  
24 provided by Higgins and Deeks<sup>62</sup> with appropriate modifications for the review. The data for  
25 analysis also include either verbatim quotes directly from participants or the authors'  
26 findings. As Rodgers and colleagues confirm, this would not only improve the process of  
27 transparency by better understanding the sorts of data extracted from which studies, but also  
28 recognising the contribution made by each study to the overall synthesis.<sup>63</sup> In addition, such  
29 tables will demonstrate how the individual study area contributes to the reviewers' final  
30 conclusion.

### 41 42 **Dealing with missing data**

43 In the case of missing data that might be important to summarise/synthesise study findings, or  
44 details of the studies are unclear, we will contact all corresponding authors of included  
45 studies to give the opportunity to provide missing data. If authors do not respond, we will  
46 record the fact that we tried to contact them, and the number of non-respondents. In such  
47 cases, we can either use imputation or risk of bias tools to reduce the likelihood of this being  
48 problematic. Generally it is considered that non-responding authors are equivalent to non-  
49 responders to interviews in observational/experimental studies. The impact of this will be  
50 reported in the discussion section of the SR.

### **Subgroup analysis**

We anticipate much variation on the type and nature of NPIs or settings in relation to COVID-19. Based on the scoping search, it is difficult to disentangle the individual effect of each NPI on reducing or preventing COVID-19 transmission, as the role of combined NPIs have been often reported in different literatures, therefore we do not consider a subgroup analysis to measure which NPIs would be more effective than others. However, some emerging data confirmed cases of COVID-19 and deaths amongst (i) different healthcare professionals (medical doctors, nurses, allied healthcare professionals) and (ii) socio-economic groups (Black, Asian, White) therefore we will be doing a subgroup analysis examining the association between NPIs and cases/deaths from COVID-19/SARS-CoV-2 on those specific groups when applicable. As Higgins et al. argue, “subgroup analyses may be done as a means of investigating heterogeneous results, or to answer specific questions about particular patient groups, types of intervention or type of study.”<sup>47(p.283)</sup>

### **Patient and public involvement**

As this is a protocol for a SR and MA, neither patients nor public will be directly involved, and ethics approval and consent will not be required.

### **Dissemination**

We will be able to disseminate the study findings as follows: publishing at least one paper in peer-reviewed journals, and abstract presented at suitable national/international conferences or workshops. We will also share important information with public health authorities as well as with the WHO. In addition, we may post the submitted manuscript under review to bioRxiv, medRxiv, or other relevant pre-print servers.

### **Discussion**

Impact of NPIs on preventing COVID-19 is a highly charged topic creating much debate among politicians, economists, and medical and public health professions. Given the rapidly-growing field, it is imperative to generate a substantial conclusion regarding the prevention, control and management of COVID-19 in public health practice. The proposed SR will therefore measure the impact of NPIs on reducing transmission of COVID-19. As such, significant outcomes from this review will guide patients and clinicians in their treatment arrangements given that there is no vaccine or treatment available at the time of writing. Furthermore, these significant findings will be vital to assist policy-makers and researchers in

1  
2  
3 synthesising a large and complex literature. Similarly, this review will provide a basis for  
4 developing the best methods and approaches for developing objective measures and  
5 interventions to establish the link between different factors and NPIs and reducing  
6 transmission of COVID-19 effectively, efficiently and equitably. It is equally important that  
7 the “structure and capacity of our depleted healthcare system are now largely driving the  
8 response to this epidemic”<sup>64</sup> and most likely it will continue to do so until services that  
9 support local communicable disease control are rebuilt and reintegrated.<sup>65</sup> It is, therefore,  
10 important to make appropriate efforts now that would address COVID-19, through  
11 strengthening the primary healthcare system, to reduce the chances of future pandemics.  
12  
13  
14  
15  
16  
17  
18  
19

### 20 **Acknowledgements**

21 We thank the reviewers of the manuscript for their constructive feedback. We thank Michael  
22 Borenstein, Lifeng Lin, Paul Levay, Jesus N. Sarol Jr. and David Hewson for their inputs in  
23 the protocol. We also thank our subject librarians especially, David Abdy, for his help with  
24 finalising the search strategy.  
25  
26  
27  
28  
29

### 30 **Contributors**

31 KR conceived and designed the research with the advice from CML; KR wrote the first draft;  
32 KR and CML reviewed and contributed to drafting, revising and finalising the manuscript.  
33 All authors have reviewed and approved the final version of the manuscript and have given  
34 their permission for publication.  
35  
36  
37  
38  
39

### 40 **Funding statement**

41 The authors received no financial support for this research study.  
42  
43  
44  
45

### 46 **Competing interests**

47 None declared.  
48  
49

### 50 **Patient consent for publication**

51 Not required.  
52  
53  
54  
55

### 56 **References**

- 57  
58 1. World Health Organisation. *WHO Director-General’s opening remarks at the media*  
59 *briefing on COVID-19*. [Internet]. 2020 <https://www.who.int/dg/speeches/detail/who->  
60

- 1  
2  
3 director-general-s-opening-remarks-at-the-media-briefing-on-covid-19---11-march-  
4 2020  
5  
6  
7 2. World Health Organisation. *Coronavirus disease (COVID-19) pandemic*. [Internet].  
8 2020. <https://www.who.int/emergencies/diseases/novel-coronavirus-2019>.  
9  
10 3. Razaq A, Harrison D, Karunanithi S, Barr B, *et al*. BAME COVID-19 deaths-what do  
11 we know? Rapid data & evidence review: “hidden in plain sight.” [Internet]. 2020  
12 [https://www.cebm.net/wp-content/uploads/2020/05/BAME-COVID-Rapid-Data-](https://www.cebm.net/wp-content/uploads/2020/05/BAME-COVID-Rapid-Data-Evidence-Review-Final-Hidden-in-Plain-Sight-compressed.pdf)  
13 [Evidence-Review-Final-Hidden-in-Plain-Sight-compressed.pdf](https://www.cebm.net/wp-content/uploads/2020/05/BAME-COVID-Rapid-Data-Evidence-Review-Final-Hidden-in-Plain-Sight-compressed.pdf)  
14  
15  
16 4. Cook T, Kursumovic E, Lennane S. Exclusive: deaths of NHS staff from covid-19  
17 analysed. *Heal Serv J*. 2020. [https://www.hsj.co.uk/exclusive-deaths-of-nhs-staff-](https://www.hsj.co.uk/exclusive-deaths-of-nhs-staff-from-covid-19-analysed/7027471.article)  
18 [from-covid-19-analysed/7027471.article](https://www.hsj.co.uk/exclusive-deaths-of-nhs-staff-from-covid-19-analysed/7027471.article)  
19  
20  
21 5. Public Health England. *Beyond the data: understanding the impact of COVID-19 on*  
22 *BAME communities*. [Internet]. 2020  
23 [https://assets.publishing.service.gov.uk/government/uploads/system/uploads/attachmen](https://assets.publishing.service.gov.uk/government/uploads/system/uploads/attachment_data/file/892376/COVID_stakeholder_engagement_synthesis_beyond_the_data.pdf)  
24 [t\\_data/file/892376/COVID\\_stakeholder\\_engagement\\_synthesis\\_beyond\\_the\\_data.pdf](https://assets.publishing.service.gov.uk/government/uploads/system/uploads/attachment_data/file/892376/COVID_stakeholder_engagement_synthesis_beyond_the_data.pdf)  
25  
26  
27 6. Public Health England. *Disparities in the risk and outcomes from COVID-19*.  
28 [Internet]. 2020.  
29 [https://assets.publishing.service.gov.uk/government/uploads/system/uploads/attachmen](https://assets.publishing.service.gov.uk/government/uploads/system/uploads/attachment_data/file/889195/disparities_review.pdf)  
30 [t\\_data/file/889195/disparities\\_review.pdf](https://assets.publishing.service.gov.uk/government/uploads/system/uploads/attachment_data/file/889195/disparities_review.pdf)  
31  
32  
33 7. van Elsland SL, O’Hare R. *Coronavirus pandemic could have caused 40 million*  
34 *deaths if left unchecked*. [Internet]. 2020.  
35 [https://www.imperial.ac.uk/news/196496/coronavirus-pandemic-could-have-caused-](https://www.imperial.ac.uk/news/196496/coronavirus-pandemic-could-have-caused-40/)  
36 [40/](https://www.imperial.ac.uk/news/196496/coronavirus-pandemic-could-have-caused-40/)  
37  
38  
39 8. Lewnard JA, Lo NC. Scientific and ethical basis for social-distancing interventions  
40 against COVID-19. *Lancet Infect Dis*. 2020;20(6):631-633.  
41  
42  
43 9. Feuer W. *Worldwide coronavirus cases top 200,000, doubling in two weeks*. [Internet].  
44 2020 [https://www.cnbc.com/2020/03/18/worldwide-coronavirus-cases-top-200000-](https://www.cnbc.com/2020/03/18/worldwide-coronavirus-cases-top-200000-for-the-first-time.html)  
45 [for-the-first-time.html](https://www.cnbc.com/2020/03/18/worldwide-coronavirus-cases-top-200000-for-the-first-time.html)  
46  
47  
48 10. Flaxman S, Mishra S, Gandy A, *et al*. Estimating the effects of non-pharmaceutical  
49 interventions on COVID-19 in Europe. *Nature* 2020;584:257-261.  
50  
51  
52 11. World Health Organization. *Overview of Public Health and Social Measures in the*  
53 *Context of COVID-19: Interim Guidance*. [Internet]. 2020  
54 <https://apps.who.int/iris/handle/10665/332115>.  
55  
56  
57 12. Akiyama MJ, Spaulding AC, Rich JD. Flattening the Curve for Incarcerated  
58  
59  
60

- 1  
2  
3 Populations — Covid-19 in Jails and Prisons. *N Engl J Med*. 2020;382(22):2075-2077.  
4  
5 13. Chowdhury A, Kabir K, Tanimoto J, *et al*. How quarantine and social distancing  
6 policy can suppress the outbreak of novel coronavirus in developing or under poverty  
7 level countries: a mathematical and statistical analysis. 04 April 2020, PREPRINT  
8 (Version 1) available at Research Square [[+https://doi.org/10.21203/rs.3.rs-20294/v1](https://doi.org/10.21203/rs.3.rs-20294/v1)]  
9  
10  
11  
12  
13 14. Hick JL, Biddinger PD. Novel coronavirus and old lessons - preparing the health  
14 system for the pandemic. *N Engl J Med*. 2020;382(20):e55.  
15  
16  
17 15. Ahmed F, Zviedrite N, Uzicanin A. Effectiveness of workplace social distancing  
18 measures in reducing influenza transmission: a systematic review. *BMC Public Health*.  
19 2018;18(1):518.  
20  
21  
22 23 16. Mal P, Suneel P, Shomeeta P. Social distancing: a non-pharmacological intervention  
24 for COVID-19. *J Pak Med Assoc*. 2020;(0):1.  
25  
26 27 17. Kar SK, Arafat SMY, Sharma P, *et al*. COVID-19 pandemic and addiction: current  
28 problems and future concerns. *Asian J Psychiatr*. 2020;51:102064.  
29  
30 31 18. Harris M, Ghebreyesus, T, Ryan M, *et al*. *Covid-19* [Internet]. 2020  
32 [https://web.archive.org/web/20200325084602/https://www.who.int/docs/default-](https://web.archive.org/web/20200325084602/https://www.who.int/docs/default-source/coronaviruse/transcripts/who-audio-emergencies-coronavirus-press-conference-full-20mar2020.pdf?sfvrsn=1eafbff_0)  
33 [source/coronaviruse/transcripts/who-audio-emergencies-coronavirus-press-conference-](https://web.archive.org/web/20200325084602/https://www.who.int/docs/default-source/coronaviruse/transcripts/who-audio-emergencies-coronavirus-press-conference-full-20mar2020.pdf?sfvrsn=1eafbff_0)  
34 [full-20mar2020.pdf?sfvrsn=1eafbff\\_0](https://web.archive.org/web/20200325084602/https://www.who.int/docs/default-source/coronaviruse/transcripts/who-audio-emergencies-coronavirus-press-conference-full-20mar2020.pdf?sfvrsn=1eafbff_0)  
35  
36 37 19. Johnson CY. SLFA. Social distancing could buy U.S. valuable time against  
38 coronavirus. [Internet]. 2020  
39 <https://www.washingtonpost.com/health/2020/03/10/social-distancing-coronavirus/>.  
40 Published 2020.  
41  
42 43 20. Rocklöv J, Sjödin H, Wilder-Smith A. COVID-19 outbreak on the Diamond Princess  
44 cruise ship: estimating the epidemic potential and effectiveness of public health  
45 countermeasure. *J Travel Med*. 2020;27(3).  
46  
47 48 21. Sjödin H, Wilder-Smith A, Osman S, *et al*. Only strict quarantine measures can curb  
49 the coronavirus disease (COVID-19) outbreak in Italy, 2020. *Euro Surveill*.  
50 2020;25(13):2000280  
51  
52 53 22. World Health Organisation. *Coronavirus disease (COVID-19) advice for the public*.  
54 [Internet]. 2020 [https://www.who.int/emergencies/diseases/novel-coronavirus-](https://www.who.int/emergencies/diseases/novel-coronavirus-2019/advice-for-public)  
55 [2019/advice-for-public](https://www.who.int/emergencies/diseases/novel-coronavirus-2019/advice-for-public)  
56  
57 58 23. Park M, Cook AR, Lim J, *et al*. A Systematic review of covid-19 epidemiology based  
59 on current evidence. *J Clin Med*. 2020;9(4):967.  
60

- 1
  - 2
  - 3
  - 4
  - 5
  - 6
  - 7
  - 8
  - 9
  - 10
  - 11
  - 12
  - 13
  - 14
  - 15
  - 16
  - 17
  - 18
  - 19
  - 20
  - 21
  - 22
  - 23
  - 24
  - 25
  - 26
  - 27
  - 28
  - 29
  - 30
  - 31
  - 32
  - 33
  - 34
  - 35
  - 36
  - 37
  - 38
  - 39
  - 40
  - 41
  - 42
  - 43
  - 44
  - 45
  - 46
  - 47
  - 48
  - 49
  - 50
  - 51
  - 52
  - 53
  - 54
  - 55
  - 56
  - 57
  - 58
  - 59
  - 60
24. Harapan H, Itoh N, Yufika A, *et al.* The COVID-19 pandemic calls for spatial distancing and social closeness: not for social distancing! *J Infect Public Health.* 2020;13(5):667-673.
25. Lin C, Ye R, Xia YL. A meta-analysis to evaluate the effectiveness of real-time PCR for diagnosing novel coronavirus infections. *Genet Mol Res.* 2015;14(4):15634-15641.
26. Viner RM, Russell S, Croker H, *et al.* School closure and management practices during coronavirus outbreaks including COVID-19: a rapid systematic review. *Lancet Child Adolesc Heal.* 2020;4(5):397-404.
27. Brooks SK, Webster RK, Smith LE, *et al.* The psychological impact of quarantine and how to reduce it: rapid review of the evidence. *Lancet.* 2020;395(10227):912-920.
28. Webster RK, Brooks SK, Smith LE, *et al.* How to improve adherence with quarantine: Rapid review of the evidence. *medRxiv Prepr.* Published online 2020. doi:10.1101/2020.03.17.20037408
29. Mahtani KR, Heneghan C, Aronson JK. *What is the evidence for social distancing during global pandemics? A rapid summary of current knowledge.* [Internet]. 2020. <https://www.phc.ox.ac.uk/files/covid-19-evidence-service/what-is-the-evidence-for-social-distancing-during-global-pandemics-final-1.pdf/view>
30. Rashid H, Ridda I, King C, *et al.* Evidence compendium and advice on social distancing and other related measures for response to an influenza pandemic. *Paediatr Respir Rev.* 2015;16(2):119-126.
31. Fong M, Gao Hi, Wong J, *et al.* Nonpharmaceutical measures for pandemic influenza in nonhealthcare settings-social distancing measures. *Emerg Infect Dis.* 2020;26(5):976-984.
32. Ferguson N, Laydon D, Nedjati-Gilani G, *et al.* *Report 9 - Impact of non-pharmaceutical interventions (NPIs) to reduce COVID-19 mortality and healthcare demand.* [Internet]. 2020 <https://www.imperial.ac.uk/mrc-global-infectious-disease-analysis/covid-19/report-9-impact-of-npis-on-covid-19/>
33. Lai S, Ruktanonchai NW, Zhou L, *et al.* Effect of non-pharmaceutical interventions to contain COVID-19 in China. *Nature.* Published online May 4, 2020. doi:10.1038/s41586-020-2293-x
34. Bayham J, Fenichel E. Impact of school closures for COVID-19 on the US health-care workforce and net mortality: a modelling study. *Lancet Public Heal.* 2020;5:e271-e278.
35. Hellewell J, Abbott S, Gimma A, *et al.* Feasibility of controlling COVID-19 outbreaks



- 1  
2  
3 by isolation of cases and contacts. *Lancet Glob Heal*. 2020;8(4):e488-e496.  
4  
5 36. Prem K, Liu Y, Russell T, *et al*. The effect of control strategies to reduce social mixing  
6 on outcomes of the COVID-19 epidemic in Wuhan, China: a modelling study. *Lancet*  
7 *Public Heal*. 2020;5:e261-e270.  
8  
9 37. Koo JR, Cook AR, Park M, *et al*. Interventions to mitigate early spread of SARS-CoV-  
10 2 in Singapore: a modelling study. *Lancet Infect Dis*. 2020;20(6):678-688.  
11  
12 38. Tang B, Xia F, Tang S, *et al*. The effectiveness of quarantine and isolation determine  
13 the trend of the COVID-19 epidemics in the final phase of the current outbreak in  
14 China. *Int J Infect Dis*. 2020;95:288-293.  
15  
16 39. Tang B, Wang X, Li Q, *et al*. Estimation of the transmission risk of the 2019-ncov and  
17 its implication for public health interventions. *J Clin Med*. 2020;9(2):462.  
18  
19 40. Panovska-Griffiths J. Can mathematical modelling solve the current Covid-19 crisis?  
20 *BMC Public Health*. 2020;20(1):551.  
21  
22 41. Pan D, Sze S, Minhas JS, *et al*. The impact of ethnicity on clinical outcomes in  
23 COVID-19: A systematic review. *EClinicalMedicine*. 2020;23:100404.  
24  
25 42. Chu DK, Akl EA, Duda S, *et al*. Physical distancing, face masks, and eye protection to  
26 prevent person-to-person transmission of SARS-CoV-2 and COVID-19: a systematic  
27 review and meta-analysis. *Lancet*. 2020;395(10242):1973-1987.  
28  
29 43. Nussbaumer-Streit B, Mayr V, Dobrescu A, *et al*. Quarantine alone or in combination  
30 with other public health measures to control COVID-19: a rapid review. *Cochrane*  
31 *database Syst Rev*. 2020;4:CD013574.  
32  
33 44. Jefferson T, Del Mar C, Dooley L, *et al*. Physical interventions to interrupt or reduce  
34 the spread of respiratory viruses. *Cochrane database Syst Rev*. 2011;(7).  
35 doi:10.1002/14651858.CD006207.pub4  
36  
37 45. University of Michigan. *Michigan Medicine projections show aggressive social*  
38 *distancing will dramatically reduce the peak number of hospitalized COVID-19*  
39 *patients*. [Internet]. 2020 [https://www.uofmhealth.org/news/archive/202003/michigan-](https://www.uofmhealth.org/news/archive/202003/michigan-medicine-projections-show-aggressive-social)  
40 [medicine-projections-show-aggressive-social](https://www.uofmhealth.org/news/archive/202003/michigan-medicine-projections-show-aggressive-social).  
41  
42 46. Shamseer L, Moher D, Clarke M, *et al*. Preferred reporting items for systematic review  
43 and meta-analysis protocols (PRISMA-P) 2015: elaboration and explanation. *BMJ*.  
44 2015;349(jan02 1):g7647-g7647.  
45  
46 47. Higgins JPT, Thomas J, Chandler J, *et al*. *Cochrane handbook for systematic reviews*  
47 *of interventions*. Chichester, West Sussex: John Wiley & Sons; 2019.  
48  
49 48. Katcher BS. *Medline: a guide to effective searching in pubmed & other interfaces*. San  
50  
51  
52  
53  
54  
55  
56  
57  
58  
59  
60



- 1  
2  
3 Francisco, CA: Ashbury Press; 2006.
- 4
- 5 49. Moher D, Liberati A, Tetzlaff J, Altman DG. Preferred reporting items for systematic  
6 reviews and meta-analyses: The PRISMA statement. *BMJ*. 2009;339(7716):332-336.  
7 doi:10.1136/bmj.b2535  
8
- 9
- 10 50. Wells G, Shea B, O'Connell D, et al. *The Newcastle-Ottawa Scale (NOS) for assessing*  
11 *the quality of nonrandomised studies in meta-analyses*. [Internet]. 2019  
12 [http://www.ohri.ca/programs/clinical\\_epidemiology/oxford.asp](http://www.ohri.ca/programs/clinical_epidemiology/oxford.asp)  
13
- 14
- 15 51. Khan SK, ter Riet G, Popay J, et al. Stage II Conducting the review: phase 5: study  
16 quality assessment. In: Khan SK, ter Riet G, Glanville J, et al., eds. *Undertaking*  
17 *systematic reviews of research on effectiveness. CRD's guidance for carrying out or*  
18 *commissioning reviews*. CRD Report No 4. 2nd ed. York: University of York, 2000  
19
- 20
- 21
- 22 52. Guyatt GH, Oxman AD, Vist GE, et al. GRADE: an emerging consensus on rating  
23 quality of evidence and strength of recommendations. *BMJ*. 2008;336(7650):924-926.  
24
- 25
- 26 53. Borenstein M. *Common mistakes in meta-analysis and how to avoid them*. USA:  
27 Biostat, Inc; 2019.  
28
- 29 54. Sterne J, Egger M, Moher D. *Addressing Reporting Biases*. Wiley; 2008.  
30
- 31 55. Egger M, Smith GD, Schneider M, Minder C. Bias in meta-analysis detected by a  
32 simple, graphical test. *BMJ*. 1997;315(7109):629-634.  
33
- 34 56. Peters JL, Sutton AJ, Jones DR, et al. Assessing publication bias in meta-analyses in  
35 the presence of between-study heterogeneity. *J R Stat Soc Ser A (Statistics Soc)*.  
36 2010;173(3):575-591.  
37
- 38
- 39 57. Jackson D. The implications of publication bias for meta-analysis' other parameter.  
40 *Stat Med*. 2006;25(17):2911-2921.  
41
- 42
- 43 58. Peters JL, Sutton AJ, Jones DR et al. Performance of the trim and fill method in the  
44 presence of publication bias and between-study heterogeneity. *Stat Med*.  
45 2007;26(25):4544-4562.  
46
- 47
- 48 59. Terrin N, Schmid CH, Lau J, Olkin I. Adjusting for publication bias in the presence of  
49 heterogeneity. *Stat Med*. 2003;22(13):2113-2126.  
50
- 51 60. Borenstein M, Hedges L, Higgins J, et al. *Introduction to meta-analysis*. Chichester,  
52 West Sussex: John Wiley & Sons; 2009.  
53
- 54
- 55 61. Joanna Briggs Institute. *The Joanna Briggs Institute Reviewers' manual 2014:*  
56 *methodology for JBI mixed methods systematic reviews*. Adelaide, Australia: Joanna  
57 Briggs Institute; 2014.  
58
- 59
- 60 62. Higgins J, Deeks J. Chapter 7: Selecting Studies and Collecting Data. In: Higgins J,

- 1  
2  
3 Greens S, eds. *Cochrane handbook for systematic reviews of interventions*. Chichester,  
4 West Sussex: John Wiley & Sons; 2008.  
5  
6  
7 63. Rodgers M, Sowden A, Petticrew M, *et al*. Testing methodological guidance on the  
8 conduct of narrative synthesis in systematic reviews. *Evaluation*. 2009;15(1):49-73.  
9  
10 64. Pollock AM, Roderick P, Cheng KK, Pankhania B. Covid-19: why is the UK  
11 government ignoring WHO's advice? *BMJ*. 2020;368:m1284.  
12  
13 65. Regmi K, Gilbert R, Thunhurst C. How can health systems be strengthened to control  
14 and prevent an Ebola outbreak? A narrative review. *Infect Ecol Epidemiol*.  
15 2015;5(1):28877.  
16  
17  
18  
19  
20  
21  
22  
23  
24  
25  
26  
27  
28  
29  
30  
31  
32  
33  
34  
35  
36  
37  
38  
39  
40  
41  
42  
43  
44  
45  
46  
47  
48  
49  
50  
51  
52  
53  
54  
55  
56  
57  
58  
59  
60

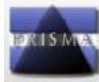

### Additional file 1. PRISMA 2009 Checklist

Impact of non-pharmaceutical interventions for reducing transmission of coronavirus disease 2019 [COVID-19]: A systematic review and meta-analysis protocol

| Section/topic             | #  | Checklist item                                                                                                                                                                                                                                                                                              | Reported on page #       | Notes                                                                                                                                                                                    |
|---------------------------|----|-------------------------------------------------------------------------------------------------------------------------------------------------------------------------------------------------------------------------------------------------------------------------------------------------------------|--------------------------|------------------------------------------------------------------------------------------------------------------------------------------------------------------------------------------|
| <b>TITLE</b>              |    |                                                                                                                                                                                                                                                                                                             |                          |                                                                                                                                                                                          |
| Title                     | 1  | Identify the report as a systematic review, meta-analysis, or both.                                                                                                                                                                                                                                         | 1                        | Title page                                                                                                                                                                               |
| <b>ABSTRACT</b>           |    |                                                                                                                                                                                                                                                                                                             |                          |                                                                                                                                                                                          |
| Structured summary        | 2  | Provide a structured summary including, as applicable: background; objectives; data sources; study eligibility criteria, participants, and interventions; study appraisal and synthesis methods; results; limitations; conclusions and implications of key findings; systematic review registration number. | 2                        |                                                                                                                                                                                          |
| <b>INTRODUCTION</b>       |    |                                                                                                                                                                                                                                                                                                             |                          |                                                                                                                                                                                          |
| Rationale                 | 3  | Describe the rationale for the review in the context of what is already known.                                                                                                                                                                                                                              | 3-6                      |                                                                                                                                                                                          |
| Objectives                | 4  | Provide an explicit statement of questions being addressed with reference to participants, interventions, comparisons, outcomes, and study design (PICOS).                                                                                                                                                  | 6                        |                                                                                                                                                                                          |
| <b>METHODS</b>            |    |                                                                                                                                                                                                                                                                                                             |                          |                                                                                                                                                                                          |
| Protocol and registration | 5  | Indicate if a review protocol exists, if and where it can be accessed (e.g., Web address), and, if available, provide registration information including registration number.                                                                                                                               | CRD42020207338 (see p.3) | We recently published preprint study protocol: <a href="https://www.medrxiv.org/content/10.1101/2020.06.13.20130294v1">https://www.medrxiv.org/content/10.1101/2020.06.13.20130294v1</a> |
| Eligibility criteria      | 6  | Specify study characteristics (e.g., PICOS, length of follow-up) and report characteristics (e.g., years considered, language, publication status) used as criteria for eligibility, giving rationale.                                                                                                      | 6-7                      |                                                                                                                                                                                          |
| Information sources       | 7  | Describe all information sources (e.g., databases with dates of coverage, contact with study authors to identify additional studies) in the search and date last searched.                                                                                                                                  | 7                        |                                                                                                                                                                                          |
| Search                    | 8  | Present full electronic search strategy for at least one database, including any limits used, such that it could be repeated.                                                                                                                                                                               | 9                        |                                                                                                                                                                                          |
| Study selection           | 9  | State the process for selecting studies (i.e., screening, eligibility, included in systematic review, and, if applicable, included in the meta-analysis).                                                                                                                                                   | 10                       |                                                                                                                                                                                          |
| Data collection process   | 10 | Describe method of data extraction from reports (e.g., piloted forms, independently, in duplicate) and any processes for obtaining and confirming data from investigators.                                                                                                                                  | 12                       |                                                                                                                                                                                          |



### Additional file 1. PRISMA 2009 Checklist

## Impact of non-pharmaceutical interventions for reducing transmission of coronavirus disease 2019 [COVID-19]: A systematic review and meta-analysis protocol

|                                    |    |                                                                                                                                                                                                                        |    |  |
|------------------------------------|----|------------------------------------------------------------------------------------------------------------------------------------------------------------------------------------------------------------------------|----|--|
| Data items                         | 11 | List and define all variables for which data were sought (e.g., PICOS, funding sources) and any assumptions and simplifications made.                                                                                  | 13 |  |
| Risk of bias in individual studies | 12 | Describe methods used for assessing risk of bias of individual studies (including specification of whether this was done at the study or outcome level), and how this information is to be used in any data synthesis. | 10 |  |
| Summary measures                   | 13 | State the principal summary measures (e.g., risk ratio, difference in means).                                                                                                                                          | 12 |  |
| Synthesis of results               | 14 | Describe the methods of handling data and combining results of studies, if done, including measures of consistency (e.g., $I^2$ ) for each meta-analysis.                                                              | 12 |  |

Page 1 of 2

| Section/topic                 | #  | Checklist item                                                                                                                                                                                           | Reported on page # | Notes |
|-------------------------------|----|----------------------------------------------------------------------------------------------------------------------------------------------------------------------------------------------------------|--------------------|-------|
| Risk of bias across studies   | 15 | Specify any assessment of risk of bias that may affect the cumulative evidence (e.g., publication bias, selective reporting within studies).                                                             | 10-11              |       |
| Additional analyses           | 16 | Describe methods of additional analyses (e.g., sensitivity or subgroup analyses, meta-regression), if done, indicating which were pre-specified.                                                         | 14                 |       |
| <b>RESULTS</b>                |    |                                                                                                                                                                                                          |                    |       |
| Study selection               | 17 | Give numbers of studies screened, assessed for eligibility, and included in the review, with reasons for exclusions at each stage, ideally with a flow diagram.                                          | NA                 |       |
| Study characteristics         | 18 | For each study, present characteristics for which data were extracted (e.g., study size, PICOS, follow-up period) and provide the citations.                                                             | NA                 |       |
| Risk of bias within studies   | 19 | Present data on risk of bias of each study and, if available, any outcome level assessment (see item 12).                                                                                                | NA                 |       |
| Results of individual studies | 20 | For all outcomes considered (benefits or harms), present, for each study: (a) simple summary data for each intervention group (b) effect estimates and confidence intervals, ideally with a forest plot. | NA                 |       |
| Synthesis of results          | 21 | Present results of each meta-analysis done, including confidence intervals and measures of consistency.                                                                                                  | NA                 |       |
| Risk of bias across studies   | 22 | Present results of any assessment of risk of bias across studies (see Item 15).                                                                                                                          | NA                 |       |
| Additional analysis           | 23 | Give results of additional analyses, if done (e.g., sensitivity or subgroup analyses, meta-regression [see Item 16]).                                                                                    | NA                 |       |



**Additional file 1. PRISMA 2009 Checklist**

Impact of non-pharmaceutical interventions for reducing transmission of coronavirus disease 2019 [COVID-19]: A systematic review and meta-analysis protocol

|                     |    |                                                                                                                                                                                      |       |  |
|---------------------|----|--------------------------------------------------------------------------------------------------------------------------------------------------------------------------------------|-------|--|
| <b>DISCUSSION</b>   |    |                                                                                                                                                                                      |       |  |
| Summary of evidence | 24 | Summarize the main findings including the strength of evidence for each main outcome; consider their relevance to key groups (e.g., healthcare providers, users, and policy makers). | 14-15 |  |
| Limitations         | 25 | Discuss limitations at study and outcome level (e.g., risk of bias), and at review-level (e.g., incomplete retrieval of identified research, reporting bias).                        | NA    |  |
| Conclusions         | 26 | Provide a general interpretation of the results in the context of other evidence, and implications for future research.                                                              | 15    |  |
| <b>FUNDING</b>      |    |                                                                                                                                                                                      |       |  |
| Funding             | 27 | Describe sources of funding for the systematic review and other support (e.g., supply of data); role of funders for the systematic review.                                           | 15    |  |

From: Moher D, Liberati A, Tetzlaff J, Altman DG, The PRISMA Group (2009). Preferred Reporting Items for Systematic Reviews and Meta-Analyses: The PRISMA Statement. PLoS Med 6(7): e1000097. doi:10.1371/journal.pmed1000097

For more information, visit: [www.prisma-statement.org](http://www.prisma-statement.org).

# BMJ Open

## Impact of non-pharmaceutical interventions for reducing transmission of coronavirus disease 2019 [COVID-19]: A systematic review and meta-analysis protocol

|                                 |                                                                                                                                                                        |
|---------------------------------|------------------------------------------------------------------------------------------------------------------------------------------------------------------------|
| Journal:                        | <i>BMJ Open</i>                                                                                                                                                        |
| Manuscript ID                   | bmjopen-2020-041383.R3                                                                                                                                                 |
| Article Type:                   | Protocol                                                                                                                                                               |
| Date Submitted by the Author:   | 24-Sep-2020                                                                                                                                                            |
| Complete List of Authors:       | Regmi, Krishna; University of Bedfordshire, Institute for Health Research, Faculty of Health and Social Sciences<br>Lwin, Cho ; University of Dental Medicine Mandalay |
| <b>Primary Subject Heading</b>: | Infectious diseases                                                                                                                                                    |
| Secondary Subject Heading:      | Public health, Research methods                                                                                                                                        |
| Keywords:                       | Infection control < INFECTIOUS DISEASES, Public health < INFECTIOUS DISEASES, EPIDEMIOLOGY, INFECTIOUS DISEASES, COVID-19                                              |
|                                 |                                                                                                                                                                        |

SCHOLARONE™  
Manuscripts

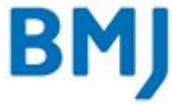

I, the Submitting Author has the right to grant and does grant on behalf of all authors of the Work (as defined in the below author licence), an exclusive licence and/or a non-exclusive licence for contributions from authors who are: i) UK Crown employees; ii) where BMJ has agreed a CC-BY licence shall apply, and/or iii) in accordance with the terms applicable for US Federal Government officers or employees acting as part of their official duties; on a worldwide, perpetual, irrevocable, royalty-free basis to BMJ Publishing Group Ltd ("BMJ") its licensees and where the relevant Journal is co-owned by BMJ to the co-owners of the Journal, to publish the Work in this journal and any other BMJ products and to exploit all rights, as set out in our [licence](#).

The Submitting Author accepts and understands that any supply made under these terms is made by BMJ to the Submitting Author unless you are acting as an employee on behalf of your employer or a postgraduate student of an affiliated institution which is paying any applicable article publishing charge ("APC") for Open Access articles. Where the Submitting Author wishes to make the Work available on an Open Access basis (and intends to pay the relevant APC), the terms of reuse of such Open Access shall be governed by a Creative Commons licence – details of these licences and which [Creative Commons](#) licence will apply to this Work are set out in our licence referred to above.

Other than as permitted in any relevant BMJ Author's Self Archiving Policies, I confirm this Work has not been accepted for publication elsewhere, is not being considered for publication elsewhere and does not duplicate material already published. I confirm all authors consent to publication of this Work and authorise the granting of this licence.



1  
2  
3 **Impact of non-pharmaceutical interventions for reducing transmission of coronavirus**  
4 **disease 2019 [COVID-19]: A systematic review and meta-analysis protocol**  
5  
6  
7  
8  
9  
10  
11  
12

13 Krishna Regmi<sup>1</sup>, Cho Mar Lwin<sup>2</sup>

14  
15 <sup>1</sup>Institute for Health Research, University of Bedfordshire, Luton, UK

16  
17 <sup>2</sup>University of Medicine Mandalay, Mandalay, Myanmar  
18  
19  
20  
21  
22  
23  
24  
25  
26  
27  
28  
29  
30

31 **Correspondence to**

32 Dr Krishna Regmi

33 Institute for Health Research

34 University of Bedfordshire

35 Luton LU1 3JU

36 United Kingdom

37 Email: [Krishna.r.regmi@gmail.com](mailto:Krishna.r.regmi@gmail.com)  
38  
39  
40  
41  
42  
43  
44  
45  
46  
47  
48  
49  
50  
51  
52

53 **Keywords:** Non-pharmaceutical interventions, Social distancing, COVID-19, Prevention,  
54 Control, Systematic review  
55  
56  
57  
58  
59  
60

## Impact of non-pharmaceutical interventions for reducing transmission of coronavirus disease 2019 [COVID-19]: A systematic review and meta-analysis protocol

### Abstract

**Introduction:** Implementing non-pharmaceutical interventions (NPIs) protect the public from coronavirus disease 2019 (COVID-19). However, the impact of NPIs has been inconsistent and remains unclear. This study, therefore, aims to measure the impact of major NPIs (social distancing, social isolation and quarantine) on reducing COVID-19 transmission.

**Methods and analysis:** We will conduct a systematic review (SR) and meta-analysis (MA) research of both randomised and non-randomised controlled trials. We will undertake a systematic search of: MEDLINE, EMBASE, Allied & Complementary Medicine, COVID-19 Research, WHO database on COVID-19, ClinicalTrials.Gov for clinical trials on COVID-19, Cochrane Resources on Coronavirus (COVID-19), Oxford COVID-19 Evidence Service, Google Scholar for published and unpublished literatures on COVID-19 including pre-print engines such as medRxiv, bioRxiv, LitCovid and SSRN for unpublished studies on COVID-19, and will be reported in accordance with PRISMA. Outcomes of interest for impact analysis will include the reduction of COVID-19 transmission, avoiding crowds and restricting movement, isolating ill and psychological impacts. The Preferred Reporting Items for Systematic Review and Meta-Analysis Protocols (PRISMA-P) checklist has been used for this protocol. For quality of included studies, we will use the Cochrane Collaboration's tool for assessing risk of bias for randomised controlled trials and the Newcastle Ottawa scale for observational studies. The GRADE approach will grade the certainty of the evidence for all outcome measures across studies. Random-effects model for meta-analysis will measure the effect size of NPIs or the strengths of relationships. For quantitative data, risk ratio or odds ratio, absolute risk difference (for dichotomous outcome data), or mean difference or standardised mean difference (for continuous data) and their 95% confidence intervals will be calculated. Where statistical pooling is not possible, a narrative synthesis, will be conducted for the included studies. To assess the heterogeneity of effects,  $I^2$  together with the observed effects will be evaluated to provide the true effects in the analysis.

**Ethics and dissemination:** Formal ethical approval from an institutional review board or research ethics committee is not required as primary data will not be collected. The final results of this study will be published in an open-access peer-reviewed journal, and abstract

1  
2  
3 will be presented at suitable national/international conferences or workshops. We will also  
4 share important information with public health authorities as well as with the World Health  
5 Organization (WHO). In addition, we may post the submitted manuscript under review to  
6 medRxiv, or other relevant pre-print servers.  
7  
8  
9

10  
11  
12 **Registration:** International Prospective Register of Systematic Reviews (PROSPERO)  
13 registration number CRD42020207338.  
14  
15

### 16 17 **Strengths and limitations of this study**

- 18 • To the best of our knowledge, this study is the first SR to measure the impact of NPIs –  
19 social distancing, isolation and quarantine – on reducing COVID-19 transmission.
- 20 • This study will offer the highest level of evidence to assist policy-makers and researchers  
21 in synthesising a large and complex literature, drawing a broader framework.
- 22 • This protocol reduces the possibility of duplication, provides transparency to the methods  
23 and procedures used, minimises potential biases and allows peer-review.
- 24 • This research is not externally funded, and therefore time and resource will be  
25 constrained.
- 26 • If included studies vary in sample size, quality and population, they may be open to bias,  
27 and the heterogeneity of data will preclude a meaningful meta-analysis to measure the  
28 effects of specific NPIs.  
29  
30  
31  
32  
33  
34  
35  
36  
37  
38  
39

### 40 **Introduction**

41 Coronavirus disease 2019 (COVID-19; caused by severe acute respiratory syndrome  
42 coronavirus 2 [SARS-CoV-2]) emerged in Wuhan, China in December 2019, and has been  
43 posing a global public health threat. On March 11, 2020, WHO declared the COVID-19  
44 outbreak a pandemic.<sup>1</sup> At the time of writing (September 24, 2020), the WHO COVID-19  
45 Situation Dashboard reports that this virus has already affected 216 countries, areas or  
46 territories with 31,664,104 confirmed cases of COVID-19 and 972,221 deaths; a fatality rate  
47 of approximately over 3% (3.07%).<sup>2</sup>  
48  
49  
50  
51  
52  
53

54 Based on reported cases, approximately 1:10 reported infections were among  
55 healthcare professionals, e.g. medical doctors, nurses.<sup>3</sup> We have seen disproportionate  
56 numbers of black, Asian and minority ethnic (BAME) doctors and other healthcare  
57 professionals die from COVID-19. A study conducted by Cook and Lennane reported  
58  
59  
60

1  
2  
3 that in the UK National Health Service (NHS), it is estimated 21% of all staff are BAME,  
4 whereas 63% of healthcare professionals who died were BAME.<sup>4</sup> A recent UK government  
5 review<sup>5</sup> highlighted that the highest age-standardised diagnosis rates of COVID-19 per  
6 100,000 population were in people of BAME groups (486 female and 649 male) and the  
7 lowest were in White people (220 female and 224 male). Accounting for the effect of sex,  
8 age, deprivation and region, Bangladeshi people had about twice the risk of death compared  
9 with White British. Similarly, Chinese, Indian, Pakistani, other Asian, Caribbean and other  
10 Black ethnicity had between 10 and 50% higher risk of death compared to White British. In  
11 fact, this is the opposite of observations in previous years, when all-cause mortality rates  
12 were lower in BAME.<sup>3,5</sup>

13  
14 Similarly, the COVID-19 mortality rate in the USA for African-Americans was 2.4-  
15 2.7 times more than for White individuals.<sup>3</sup> However, death rates are not consistent across  
16 these groups. Inequalities in COVID-19 mortalities are rife, which is most recently shown by  
17 Public Health England.<sup>6</sup> Several factors were identified as risks for COVID-19, e.g.  
18 ethnicity, age, sex, co-morbidities (diabetes, renal conditions), occupation, socio-economic  
19 status, and multifamily and multigenerational households.<sup>6-8</sup>

20  
21 Recent data from Johns Hopkins University reported that global COVID-19 deaths  
22 have surpassed 890,000.<sup>9</sup> Imperial College London highlights that this outbreak could kill 40  
23 million people this year without public health measures (e.g. case finding, contact tracing and  
24 testing, and strict quarantine).<sup>7</sup> Evidence suggests that the number of cases reported would  
25 possibly “represent an underestimation of the true burden due to lack of surveillance and  
26 diagnostic capacity”<sup>8</sup> as well as pharmaceuticals to manage severe COVID-19.<sup>10</sup>

27  
28 Several countries, including the United Kingdom (UK), United States of America  
29 (USA) and other European Union (EU) countries are adopting social distancing (SD) measure  
30 as a form of non-pharmaceutical or physical interventions to control COVID-19 by slowing  
31 down transmission of the virus and preventing associated illness and death.<sup>11</sup> SD is the new  
32 buzzword with the outbreak of coronavirus and COVID-19. In the literature, the term SD can  
33 have different meanings; for example, some considered it as strategy,<sup>12</sup> policy,<sup>13</sup> an approach  
34 to flatten the curve,<sup>14</sup> mitigation measure to increase physical distance or reduce frequency of  
35 congregation in socially dense community settings.<sup>15-17</sup> Flaxman et al.<sup>10</sup> defined SD as a  
36 measure to ban large gatherings and advise individuals not to socialise outside their  
37 households by closing borders, some public places, schools and universities;  
38 isolation/quarantine, physical distancing and room separation to isolate symptomatic  
39 individuals and their contacts; and large-scale lockdowns of populations by staying at least  
40

1  
2  
3 2m apart aiming to minimise mixing of infectious susceptible patients. This definition of SD,  
4 in fact, is very vague and includes interventions which are considered different to SD, e.g.  
5 quarantine including school closure and case findings.  
6  
7

8 For clarity, in this SR, the definition of SD (also called physical distancing) is  
9 considered as a set of NPIs intended to prevent spread of COVID-19 by maintaining physical  
10 distance between people and reducing the number of times people come into close  
11 contact.<sup>18,19</sup> This review focuses only on COVID-19/SARS-CoV-2 and three major NPIs,  
12 namely SD, isolation and quarantine. Isolation of cases refers to the separation of ill persons  
13 with contagious diseases from non-infected persons, either hospitalised (moderate or severe  
14 cases) to provide care, or in dedicated isolation facilities or at home (mild cases),<sup>20</sup> and  
15 quarantine is the restriction of persons who are presumed to have been exposed to a  
16 contagious disease but are not ill, either because they did not become infected or because they  
17 are still in the incubation period.<sup>21</sup> WHO recommends isolation, physical (social) distancing,  
18 contact tracing and quarantine of close contacts as the key measures to reduce COVID-19.<sup>22</sup>  
19  
20  
21  
22  
23  
24  
25  
26

27 A scoping search of MEDLINE was done on 9 September 2020 for publications  
28 entered by the end of August 2020 with the following terms: (“COVID-19” OR “SARS-  
29 CoV-2”) AND (“systematic review” OR “literature search” OR “meta-analysis” OR  
30 “evidence synthesis”) AND (“social distancing” OR “isolation” OR “quarantine”). It  
31 revealed some empirical research on COVID-19 from China, South Korea, the UK, the USA  
32 and other countries, but these are not systemically reviewed or synthesised well. Several  
33 rapid reviews and summaries have been covered on COVID-19 epidemiology,<sup>23,24</sup> the  
34 effectiveness of real-time PCR for diagnosis,<sup>25</sup> effects of school closure,<sup>26</sup> quarantine,<sup>27,28</sup>  
35 SD<sup>29</sup> (study primarily based on two previous reviews<sup>30,31</sup> on influenza from 2012 and 2018,  
36 respectively), and mathematical modelling studies incorporating the effect of SD.<sup>10,20,32–39</sup>  
37 These models would generally help to “predict epidemic curve representing the number of  
38 infections caused by the virus over time.”<sup>40</sup>  
39  
40  
41  
42  
43  
44  
45  
46  
47

48 Recently, some SRs and MAs have been conducted to investigate ethnicity and  
49 clinical outcomes.<sup>41</sup> Chu and colleagues<sup>42</sup> published a systematic review including physical  
50 distancing to investigate the optimum distance for avoiding person-to-person transmissions,  
51 focusing more on face masks and eye protection. Though their study was, perhaps, the first  
52 rapidly synthesised review, and identified 172 studies across 16 countries and six continents,  
53 none of the included studies were randomised controlled trials, therefore their findings might  
54 suffer from both recall and measurement biases. Cochrane further conducted three studies;  
55 First, a rapid review in 2020, involving 29 studies on COVID-19 from China, UK, South  
56  
57  
58  
59  
60

1  
2  
3 Korea and Japan.<sup>43</sup> Second, a rapid qualitative evidence synthesis conducted in 2020 capturing  
4 36 studies from Asia, Africa, Central and North America and Australia examining healthcare  
5 workers' adherence and enablers or challenges associated with infection control guidelines  
6 for respiratory infections. Another study examined 67 studies including RCTs and  
7 observational studies exploring the role of physical interventions for reducing the spread of  
8 respiratory viruses, and found no evidence regarding screening at entry ports and SD.<sup>44</sup>  
9

10  
11  
12  
13 Lewnard and Lo<sup>8</sup> and Michigan Medicine Projections<sup>45</sup> reported that combined NPIs  
14 using SD, isolation and quarantine, including workplace distancing, appeared effective in  
15 reducing COVID-19 compared to no interventions. This approach, however, reported  
16 considerable challenges, e.g. societal disruption, social isolation/rejection, mental stress and  
17 psychological trauma, lack of tests and testing facilities, poor contact tracing and lack of  
18 surveillance. No studies examined the combined effects of NPIs in reducing the transmission  
19 of COVID-19. This study, therefore, aims to measure the impact of NPIs on reducing  
20 COVID-19 transmission.  
21  
22  
23  
24  
25  
26  
27  
28

## 29 **Review question**

30 What has been the impact of NPIs – social distancing, quarantine and isolation – on reducing  
31 transmission of coronavirus disease 2019 [COVID-19]?  
32  
33  
34  
35

## 36 **Methods and designs**

37 This study will utilise a SR and MA, which will consider both randomised controlled trials  
38 and non-randomised trials (prospective and retrospective observational studies). The  
39 Preferred Reporting Items for Systematic Reviews and Meta-Analysis Protocols (PRISMA-P)  
40 statement has been used in the preparation of this protocol (see online supplementary file  
41 1).<sup>46</sup> Final results will be reported according to the PRISMA statement.  
42  
43  
44  
45  
46  
47

## 48 **Criteria for considering studies for review**

### 49 *Inclusion criteria*

- 50  
51 1. Types of participants – this review will consider all studies that involve human  
52 subjects of any age-gender, including ethnic (Black, Asian, White) and healthcare  
53 workers (medical doctors, nurses, allied healthcare professions) groups.  
54  
55
- 56 2. Types of intervention – we will include research describing three major NPIs, e.g.  
57 social distance, isolation and quarantine focusing only COVID-19/SARS-CoV-2.  
58  
59  
60

3. Types of outcome measure. Primary outcomes include: COVID-19; reducing the risk of transmission/infection of COVID-19; hospitalisation, ICU admissions, COVID-19 related complications, quality of life; and mortality and morbidity. Secondary outcomes include changes in social behaviour, e.g. social distancing by avoiding crowds, restricting movements, isolating ill patients and quarantine of exposed people.
4. Types of studies. No study design filter is added, and there is no limit on our search by language. To measure the impact of NPIs, this review considers all studies evaluating the effectiveness of NPIs relating to reducing the risk of transmission/infection of COVID-19. We include both randomised controlled trials and non-randomised controlled trials, e.g. cross-sectional, survey, case-control, randomised controlled trials, and observational studies (retrospective or prospective). [We proposed to collect data from October 2020 until February 2021 for the study]

#### *Exclusion criteria*

1. Articles in narrative reviews, modelling studies, opinion pieces, letters, news, editorials, perspectives, commentaries, conference abstracts and other publications lacking primary data and/or poor methodological details.
2. Studies containing duplicate datasets.

#### **Search strategy to identify relevant studies**

We aim to undertake a systematic search of the following sources: MEDLINE, EMBASE, Allied & Complementary Medicine, COVID-19 Research, WHO database on COVID-19, ClinicalTrials.Gov for clinical trials on COVID-19, Cochrane Resources on Coronavirus (COVID-19), Oxford COVID-19 Evidence Service, Google Scholar for published and unpublished literatures on COVID-19 including pre-print engines such as medRxiv, bioRxiv, LitCovid and SSRN for unpublished studies on COVID-19 will be searched given the lags in publication. The literature search uses the following terms: “social distancing”, “quarantine”, “isolation”, “non-pharmacological interventions” combined with “COVID-19”. Primary search terms are non-pharmacological interventions or measures (all synonyms) and COVID-19 (all synonyms) using ‘Textword searching’ – searching for a word or phrase anywhere in the document, where the document is the citation (article title, journal name, author), not the full text of an article, and ‘Thesaurus (MeSH, Emtree) searching’, employing Boolean operators and truncations. The ‘Related Articles’ feature in PubMed will be consulted.



1  
2  
3 Searches will also be supplemented by reviewing the reference lists ('references of  
4 references') of selected articles to find any other relevant papers. From the identified studies  
5 in the search, forward and backward citations will also be carried out to find potential studies  
6 reporting NPIs and reducing transmission of COVID-19 for the full texts. The literature  
7 search strategy was developed by KR in collaboration with departmental subject librarians  
8 from authors' universities, who were experienced in SRs, and subsequently refined ensuring  
9 its comprehensiveness. While piloting the search strategy, we followed these broad steps:

- 15 • Tested out keywords and phrases in a MEDLINE database to see the number of hits  
16 returned, and assessed the degree of relevance;
- 17 • Reviewed some (e.g. five) papers including those marked 'highly cited' on COVID-  
18 19/SARS-CoV-2 that meet inclusion/exclusion criteria, where we looked at the terms  
19 used in the titles and abstracts for main concepts e.g. NPIs and COVID-19.
- 20 • Took notes of keywords supplied by authors and incorporated those into our strategy.
- 21 • Experimented with combinations of keywords using 'AND' (limits search) and 'OR'  
22 (expands search) operators.
- 23 • Looked at subject headings assigned for key papers and used them too.

24  
25  
26  
27  
28  
29  
30  
31  
32  
33 A broad search strategy has been designed to maximise the level of sensitivity (or  
34 comprehensiveness) in searching,<sup>47</sup> and improve both *recall ratio* (number of relevant  
35 references retrieved divided by all of the relevant references) and *precision ratio* (number of  
36 relevant references retrieved divided by the number of references retrieved).<sup>48(p.34)</sup> Key terms  
37 for one MEDLINE are shown in Table 1.  
38  
39  
40  
41  
42  
43  
44  
45  
46  
47  
48  
49  
50  
51  
52  
53  
54  
55  
56  
57  
58  
59  
60

**Table 1.** Search strategy for MEDLINE

| Concepts          | Search terms in each concepts will be modified as needed for use in other databases                                                                                                                                                                                                                                                                                                                                                                                                                                                                                                                                                                                                                                                                                                                                                                                                                                                                                                                                                                                                                            |
|-------------------|----------------------------------------------------------------------------------------------------------------------------------------------------------------------------------------------------------------------------------------------------------------------------------------------------------------------------------------------------------------------------------------------------------------------------------------------------------------------------------------------------------------------------------------------------------------------------------------------------------------------------------------------------------------------------------------------------------------------------------------------------------------------------------------------------------------------------------------------------------------------------------------------------------------------------------------------------------------------------------------------------------------------------------------------------------------------------------------------------------------|
| <i>Concept #1</i> | <i>COVID-19</i>                                                                                                                                                                                                                                                                                                                                                                                                                                                                                                                                                                                                                                                                                                                                                                                                                                                                                                                                                                                                                                                                                                |
|                   | "covid 19 pandemic"[All Fields] OR "COVID19"[All Fields] OR "COVID-19"[All Fields] OR "COVID-2019"[All Fields] OR "2019-nCoV"[All Fields] OR "2019nCoV"[All Fields] OR "coronavirus infections"[All Fields] OR "coronavirus infections"[MeSH Terms] OR "coronavirus"[All Fields] OR "coronavirus"[All Fields] OR "coronavirus"[MeSH Terms] OR "coronavirus"[MeSH Terms] OR "Betacoronavirus"[MAJR] "SARS coronavirus2"[All Fields] "sars cov"[All Fields] OR "sars virus"[All Fields] OR "sars virus"[MeSH Terms] OR "SARS"[All Fields] OR "SARS2"[All Fields] OR "SARS-2"[All Fields] OR "SARScoronavirus 2"[All Fields] OR "SARScoronavirus2"[All Fields] OR "SARS-coronavirus-2"[All Fields] OR "SARS-CoV-2"[All Fields] OR "SARSCov2019*"[All Fields] OR "SARS-Cov2019*"[All Fields] OR "SARS-Cov-2019*"[All Fields] OR "severe acute respiratory syndrome coronavirus 2"[All Fields] OR "severe acute respiratory syndrome coronavirus 2"[Supplementary Concept] OR "Wuhan coronavirus"[All Fields] OR "Wuhan"[All Fields] AND ("coronavirus"[MeSH Terms] OR "coronavirus"[All Fields] OR "COVID-19"[nm]) |
| <i>Concept #2</i> | <i>Non-Pharmaceutical Interventions</i>                                                                                                                                                                                                                                                                                                                                                                                                                                                                                                                                                                                                                                                                                                                                                                                                                                                                                                                                                                                                                                                                        |
|                   | "social distancing"[TIAB] OR "cohorting"[All Fields] OR "community containment"[All Fields] OR "isolation strategy"[All Fields] OR "isolation"[All Fields] OR "patient isolation"[All Fields] OR "patient isolation"[MeSH Terms] OR "patient isolators"[All Fields] OR "patient isolators"[MeSH Terms] OR "physical contact"[All Fields] OR "physical distancing"[All Fields] OR "quarantine"[All Fields] OR "quarantines"[All Fields] OR "quarantine"[MeSH Terms] OR "social distance"[All Fields] OR "quarantines"[All Fields] OR "quarantined"[All Fields] OR "quarantining"[All Fields] OR "social distance"[MeSH Terms] OR "Social distancing"[All Fields] OR "Banning"[All Fields] OR "distancing"[All Fields]                                                                                                                                                                                                                                                                                                                                                                                           |
| <i>Concept #3</i> | <i>Reduce transmission</i>                                                                                                                                                                                                                                                                                                                                                                                                                                                                                                                                                                                                                                                                                                                                                                                                                                                                                                                                                                                                                                                                                     |

"reduce"[All Fields] OR "reduced"[All Fields] OR "reduces"[All Fields] OR "transmission"[MeSH Subheading] OR "transmission"[All Fields] OR "transmissions"[All Fields] OR "prevention and control"[Subheading] OR prevention[Text Word] OR "reduce infection"[All Fields] OR infect"[All Fields] OR "infectability"[All Fields] OR "infectable"[All Fields] OR "infectant"[All Fields] OR "infectants"[All Fields] OR "infected"[All Fields] OR "infecteds"[All Fields] OR "infectibility"[All Fields] OR "infectible"[All Fields] OR "infecting"[All Fields] OR "infection s"[All Fields] OR "infections"[MeSH Terms] OR "infections"[All Fields] OR "infection"[All Fields] OR "infective"[All Fields] OR "infectiveness"[All Fields] OR "infectives"[All Fields] OR "infectivities"[All Fields] OR "infects"[All Fields] OR "pathogenicity"[MeSH Subheading] OR "pathogenicity"[All Fields] OR "infectivity"[All Fields] OR "Coronavirus Infections/prevention and control"[MAJR] OR "Pandemics/prevention and control"[MAJR]

We combined these concepts (using AND), so all concepts are in the same references.

### **Selection of studies**

The citations identified will be imported into Mendeley Reference Manager (<https://www.mendeley.com/>). All studies emerging from the databases are screened in two stages: (i) screening of titles and abstracts by two reviewers against minimum inclusion criteria, and (ii) review of full text. We will use the standard PRISMA flow diagram to provide the study selection process.<sup>49</sup>

### **Quality assessment and risk of bias**

Quality of the included studies will be assessed using Cochrane Collaboration's tool for assessing risk of bias for randomised controlled trials and the Newcastle Ottawa scale (NOS) for non-randomised studies.<sup>50</sup> Where possible, we will analyse randomised (according to effectiveness of randomisation method, generation of allocation sequence, allocation concealment, blinding, and follow-up) and non-randomised studies (for presence of potential confounders for case-control and cohort studies), and a three-point checklist will be used for controlled before and after studies<sup>51</sup> separately. In NOS, "a 'star system' has been developed in which a study is judged on three broad perspectives: the selection of the study groups; the comparability of the groups; and the ascertainment of either the exposure or outcome of interest for case-control or cohort studies respectively".<sup>50</sup> Some items or questions in these

1  
2  
3 quality assessments e.g. blinded study, are irrelevant to social distancing studies; we therefore  
4 consider removing them. Risk of bias will be examined, as it provides variation,  
5 e.g. heterogeneity in results of studies included in the study. As Higgins et al.<sup>47</sup> argue,  
6 rigorously conducted studies in the SR would provide more truthful results, and the results  
7 from the studies of variable validity would give either false negative or false positive  
8 conclusions. In this study, the GRADE (Grading of Recommendations Assessment,  
9 Development and Evaluation) approach will be used to assess the certainty of the evidence –  
10 risk of bias across studies.<sup>52</sup>  
11  
12  
13  
14  
15  
16  
17  
18

19 Generally, the bias table provides the type of bias (e.g., selective reporting of outcomes,  
20 random sequence generation, allocation of concealment, blinding of participants, personnel  
21 and assessors, incomplete outcome data and other potential threats to validity) in each study.  
22 If, for example, most rows are unshaded then that is considered a low risk of bias, whereas if  
23 some rows are either partly-shaded or dark (risk of bias either unclear or high), this would  
24 provide relatively less confidence in the results.<sup>47</sup> A narrative synthesis will be conducted for  
25 all included studies. Included studies will be assessed by two authors (KR, CML) and the  
26 results will inform synthesis and interpretation of the findings. To facilitate comparison of  
27 appraisal processes, all reviewers will record the rationale for inclusion or exclusion, and  
28 discrepancies will be discussed and resolved by consensus.  
29  
30  
31  
32  
33  
34  
35  
36  
37

### 38 **Assessment of reporting biases**

39 Publication bias, often called reporting bias and dissemination bias, is the concern that studies  
40 reporting relatively large effects are more likely to be published than studies reporting  
41 smaller effects.<sup>53</sup> Similarly, published studies including multiple outcomes would be more  
42 likely to report the outcomes than if they showed statistically significant results.<sup>54</sup> We will  
43 use funnel plot to estimate the publication bias.<sup>55</sup> If meta-analysis had captured all relevant  
44 studies we would expect the funnel plot to be symmetric, i.e. we would expect studies to be  
45 dispersed equally on either side of the overall effect.<sup>53</sup> One approach to address publication  
46 bias is to follow the trim and fill procedures, i.e. assessing asymmetry or symmetry in the  
47 funnel plot if more than 10 eligible studies are identified.<sup>53(p.175)</sup> Trim and fill is a method  
48 which allows us to impute these studies, i.e. we determine where missing studies are likely to  
49 fall, add them to the analysis, and then recompute the combined effect. In any meta-analysis  
50 where the studies are pulled from journals or unpublished data in preprint servers, such as  
51 medRxiv, we need to be concerned about the potential impact of publication bias.<sup>56-59</sup> If the  
52  
53  
54  
55  
56  
57  
58  
59  
60

1  
2  
3 funnel plot is still asymmetric and implies potential bias after including these unpublished  
4 data, we use the Trim and Fill method to quantitatively assess the bias. The Trim and Fill  
5 method serves as a sensitivity analysis.<sup>58</sup> Specifically, if the smaller studies tend to have  
6 larger effects, and if this is actually due to publication bias, this method tells us what the  
7 effect size would be in the absence of bias.<sup>57,59</sup>  
8  
9  
10  
11  
12

### 13 **Data analysis and synthesis**

14 For quantitative data, where possible, we will measure a risk ratio (RR) or odds ratio (OR),  
15 absolute risk difference (ARD) for dichotomous/categorical outcome data, and mean  
16 difference (MD) or standardised mean difference (SMD) will be calculated for continuous  
17 data, with their 95% confidence intervals (CIs) from the data generated by each included  
18 study.<sup>53</sup>  
19  
20  
21  
22  
23

24 If sufficient data are available to make an inference to a universe of comparable  
25 studies, results from the comparable groups of studies will be pooled into the statistical  
26 random-effects model for meta-analysis to measure the effect size of NPIs on reducing  
27 transmission of COVID-19 or the strengths of relationships using the software  
28 Comprehensive Meta-Analysis (CMA, version 3. [https://www.meta-  
29 analysis.com/pages/new\\_v3.php?cart=BT2P4569026](https://www.meta-analysis.com/pages/new_v3.php?cart=BT2P4569026)). The purpose of using a random-effects  
30 model in the analysis is “to incorporate the assumption that the different studies are  
31 estimating different, yet related, intervention effects”.<sup>47</sup> To test the heterogeneity of effects in  
32 the included studies, we will use Higgins et al.’s  $I^2$  together with the observed effects to  
33 measure the true effects in the analysis.<sup>47</sup> The  $I^2$  test for heterogeneity is meant to evaluate  
34 whether there is variability across publications.  
35  
36  
37  
38  
39  
40  
41  
42

43 This will be computed as follows:

$$44 I^2 = \left( \frac{Q - df}{Q} \right) \times 100\%$$

45  
46  
47  
48  
49  
50  
51 Q-value (Cochran’s heterogeneity statistic) is the sum of the squared deviations of all  
52 effect sizes from the mean effect size and  $df$  indicates the degrees of freedom. We report the  
53 prediction interval. This speaks directly to the actual utility of the interventions, but provides  
54 the smallest and largest effect sizes associated with this intervention.<sup>60</sup> A rough guide, it is  
55 interpreted that: 0%-40% might not be important, 30%-60% may represent moderate  
56 heterogeneity, 50%-90% may represent substantial heterogeneity, and 75%-100%  
57  
58  
59  
60

1  
2  
3 considerable heterogeneity.<sup>47</sup> Generally, the importance of observed value of  $I^2$  on moderate  
4 and substantial heterogeneity depends on the magnitude and direction of effects as well as the  
5 strength of heterogeneity.<sup>47,60</sup> Where statistical pooling is not possible, a narrative synthesis  
6 is conducted for the included studies. For qualitative data, where meta-synthesis is possible,  
7 textual data is pooled using the JBI Qualitative Assessment and Review Instrument (JBI-  
8 QARI) and Narrative, Opinion and Text Assessment and Review Instrument (JBI-  
9 NOTARI).<sup>61</sup>

### 16 17 **Data extraction and data items**

18 Two reviewers independently extract descriptive data and data relevant to the quality of each  
19 study using the data extraction form. Data items i.e. source of study, eligibility, reasons for  
20 exclusion, methods (study design, duration), participants (number, setting, age-gender),  
21 intervention and comparator characteristics, results (number of participants, sample size, data  
22 for each intervention group, quantitative outcomes – mean, SDs, estimate effect), source of  
23 funding, ethics approval and study limitation will be extracted, based on the checklist  
24 provided by Higgins and Deeks<sup>62</sup> with appropriate modifications for the review. The data for  
25 analysis also include either verbatim quotes directly from participants or the authors'  
26 findings. As Rodgers and colleagues confirm, this would not only improve the process of  
27 transparency by better understanding the sorts of data extracted from which studies, but also  
28 recognising the contribution made by each study to the overall synthesis.<sup>63</sup> In addition, such  
29 tables will demonstrate how the individual study area contributes to the reviewers' final  
30 conclusion.

### 41 42 **Dealing with missing data**

43 In the case of missing data that might be important to summarise/synthesise study findings, or  
44 details of the studies are unclear, we will contact all corresponding authors of included  
45 studies to give the opportunity to provide missing data. If authors do not respond, we will  
46 record the fact that we tried to contact them, and the number of non-respondents. In such  
47 cases, we can either use imputation or risk of bias tools to reduce the likelihood of this being  
48 problematic. Generally it is considered that non-responding authors are equivalent to non-  
49 responders to interviews in observational/experimental studies. The impact of this will be  
50 reported in the discussion section of the SR.

### **Subgroup analysis**

We anticipate much variation on the type and nature of NPIs or settings in relation to COVID-19. Based on the scoping search, it is difficult to disentangle the individual effect of each NPI on reducing or preventing COVID-19 transmission, as the role of combined NPIs have been often reported in different literatures, therefore we do not consider a subgroup analysis to measure which NPIs would be more effective than others. However, some emerging data confirmed cases of COVID-19 and deaths amongst (i) different healthcare professionals (medical doctors, nurses, allied healthcare professionals) and (ii) socio-economic groups (Black, Asian, White) therefore we will be doing a subgroup analysis examining the association between NPIs and cases/deaths from COVID-19/SARS-CoV-2 on those specific groups when applicable. As Higgins et al. argue, “subgroup analyses may be done as a means of investigating heterogeneous results, or to answer specific questions about particular patient groups, types of intervention or type of study.”<sup>47(p.283)</sup>

### **Patient and public involvement**

Patients or the public were not directly involved in the design of this study. As this is a protocol for a systematic review and no participant recruitment will take place, their involvement on the recruitment and dissemination of findings to participants was not applicable.

### **Ethics and dissemination**

Formal ethical approval is not required as primary data will not be collected in this study. The final results of this study will be published in an open-access peer-reviewed journal, and abstract will be presented at suitable national/international conferences or workshops. This systematic review and meta-analysis will report the impact of major NPIs (social distancing, social isolation and quarantine) on reducing COVID-19 transmission. We will also share important information with public health authorities as well as with the WHO. In addition, we may post the submitted manuscript under review to bioRxiv, medRxiv, or other relevant pre-print servers.

### **Discussion**

Impact of NPIs on preventing COVID-19 is a highly charged topic creating much debate among politicians, economists, and medical and public health professions. Given the rapidly-growing field, it is imperative to generate a substantial conclusion regarding the prevention,



1  
2  
3 control and management of COVID-19 in public health practice. The proposed SR will  
4 therefore measure the impact of NPIs on reducing transmission of COVID-19. As such,  
5 significant outcomes from this review will guide patients and clinicians in their treatment  
6 arrangements given that there is no vaccine or treatment available at the time of writing.  
7  
8 Furthermore, these significant findings will be vital to assist policy-makers and researchers in  
9  
10 synthesising a large and complex literature. Similarly, this review will provide a basis for  
11  
12 developing the best methods and approaches for developing objective measures and  
13  
14 interventions to establish the link between different factors and NPIs and reducing  
15  
16 transmission of COVID-19 effectively, efficiently and equitably. It is equally important that  
17  
18 the “structure and capacity of our depleted healthcare system are now largely driving the  
19  
20 response to this epidemic”<sup>64</sup> and most likely it will continue to do so until services that  
21  
22 support local communicable disease control are rebuilt and reintegrated.<sup>65</sup> It is, therefore,  
23  
24 important to make appropriate efforts now that would address COVID-19, through  
25  
26 strengthening the primary healthcare system, to reduce the chances of future pandemics.  
27  
28

### 29 **Acknowledgements**

30 We thank the reviewers of the manuscript for their constructive feedback. We thank Michael  
31  
32 Borenstein, Lifeng Lin, Paul Levay, Jesus N. Sarol Jr. and David Hewson for their inputs in  
33  
34 the protocol. We also thank our subject librarians especially, David Abdy, for his help with  
35  
36 finalising the search strategy.  
37  
38

### 39 **Contributors**

40  
41 KR conceived and designed the research with the advice from CML; KR wrote the first draft;  
42  
43 KR and CML reviewed and contributed to drafting, revising and finalising the manuscript.  
44  
45 All authors have reviewed and approved the final version of the manuscript and have given  
46  
47 their permission for publication.  
48  
49

### 50 **Funding statement**

51 The authors received no financial support for this research study.  
52  
53  
54

### 55 **Competing interests**

56 None declared.  
57  
58  
59  
60

### Patient consent for publication

Not required.

### References

1. World Health Organisation. *WHO Director-General's opening remarks at the media briefing on COVID-19*. [Internet]. 2020 <https://www.who.int/dg/speeches/detail/who-director-general-s-opening-remarks-at-the-media-briefing-on-covid-19---11-march-2020>
2. World Health Organisation. *Coronavirus disease (COVID-19) pandemic*. [Internet]. 2020. <https://www.who.int/emergencies/diseases/novel-coronavirus-2019>.
3. Razaq A, Harrison D, Karunanithi S, Barr B, *et al*. BAME COVID-19 deaths-what do we know? Rapid data & evidence review: "hidden in plain sight." [Internet]. 2020 <https://www.cebm.net/wp-content/uploads/2020/05/BAME-COVID-Rapid-Data-Evidence-Review-Final-Hidden-in-Plain-Sight-compressed.pdf>
4. Cook T, Kursumovic E, Lennane S. Exclusive: deaths of NHS staff from covid-19 analysed. *Heal Serv J*. 2020. <https://www.hsj.co.uk/exclusive-deaths-of-nhs-staff-from-covid-19-analysed/7027471.article>
5. Public Health England. *Beyond the data: understanding the impact of COVID-19 on BAME communities*. [Internet]. 2020 [https://assets.publishing.service.gov.uk/government/uploads/system/uploads/attachment\\_data/file/892376/COVID\\_stakeholder\\_engagement\\_synthesis\\_beyond\\_the\\_data.pdf](https://assets.publishing.service.gov.uk/government/uploads/system/uploads/attachment_data/file/892376/COVID_stakeholder_engagement_synthesis_beyond_the_data.pdf)
6. Public Health England. *Disparities in the risk and outcomes from COVID-19*. [Internet]. 2020. [https://assets.publishing.service.gov.uk/government/uploads/system/uploads/attachment\\_data/file/889195/disparities\\_review.pdf](https://assets.publishing.service.gov.uk/government/uploads/system/uploads/attachment_data/file/889195/disparities_review.pdf)
7. van Elsland SL, O'Hare R. *Coronavirus pandemic could have caused 40 million deaths if left unchecked*. [Internet]. 2020. <https://www.imperial.ac.uk/news/196496/coronavirus-pandemic-could-have-caused-40/>
8. Lewnard JA, Lo NC. Scientific and ethical basis for social-distancing interventions against COVID-19. *Lancet Infect Dis*. 2020;20(6):631-633.
9. Feuer W. *Worldwide coronavirus cases top 200,000, doubling in two weeks*. [Internet]. 2020 <https://www.cnbc.com/2020/03/18/worldwide-coronavirus-cases-top-200000-for-the-first-time.html>

10. Flaxman S, Mishra S, Gandy A, *et al.* Estimating the effects of non-pharmaceutical interventions on COVID-19 in Europe. *Nature* 2020;584:257-261.
11. World Health Organization. *Overview of Public Health and Social Measures in the Context of COVID-19: Interim Guidance*. [Internet]. 2020  
<https://apps.who.int/iris/handle/10665/332115>.
12. Akiyama MJ, Spaulding AC, Rich JD. Flattening the Curve for Incarcerated Populations — Covid-19 in Jails and Prisons. *N Engl J Med*. 2020;382(22):2075-2077.
13. Chowdhury A, Kabir K, Tanimoto J, *et al.* How quarantine and social distancing policy can suppress the outbreak of novel coronavirus in developing or under poverty level countries: a mathematical and statistical analysis. 04 April 2020, PREPRINT (Version 1) available at Research Square [[+https://doi.org/10.21203/rs.3.rs-20294/v1](https://doi.org/10.21203/rs.3.rs-20294/v1)]
14. Hick JL, Biddinger PD. Novel coronavirus and old lessons - preparing the health system for the pandemic. *N Engl J Med*. 2020;382(20):e55.
15. Ahmed F, Zviedrite N, Uzicanin A. Effectiveness of workplace social distancing measures in reducing influenza transmission: a systematic review. *BMC Public Health*. 2018;18(1):518.
16. Mal P, Suneel P, Shomeeta P. Social distancing: a non-pharmacological intervention for COVID-19. *J Pak Med Assoc*. 2020;(0):1.
17. Kar SK, Arafat SMY, Sharma P, *et al.* COVID-19 pandemic and addiction: current problems and future concerns. *Asian J Psychiatr*. 2020;51:102064.
18. Harris M, Ghebreyesus, T, Ryan M, *et al.* *Covid-19* [Internet]. 2020  
[https://web.archive.org/web/20200325084602/https://www.who.int/docs/default-source/coronaviruse/transcripts/who-audio-emergencies-coronavirus-press-conference-full-20mar2020.pdf?sfvrsn=1eafbff\\_0](https://web.archive.org/web/20200325084602/https://www.who.int/docs/default-source/coronaviruse/transcripts/who-audio-emergencies-coronavirus-press-conference-full-20mar2020.pdf?sfvrsn=1eafbff_0)
19. Johnson CY. SLFA. Social distancing could buy U.S. valuable time against coronavirus. [Internet]. 2020  
<https://www.washingtonpost.com/health/2020/03/10/social-distancing-coronavirus/>.  
Published 2020.
20. Rocklöv J, Sjödin H, Wilder-Smith A. COVID-19 outbreak on the Diamond Princess cruise ship: estimating the epidemic potential and effectiveness of public health countermeasure. *J Travel Med*. 2020;27(3).
21. Sjödin H, Wilder-Smith A, Osman S, *et al.* Only strict quarantine measures can curb the coronavirus disease (COVID-19) outbreak in Italy, 2020. *Euro Surveill*.

- 2020;25(13):2000280
22. World Health Organisation. *Coronavirus disease (COVID-19) advice for the public*. [Internet]. 2020 <https://www.who.int/emergencies/diseases/novel-coronavirus-2019/advice-for-public>
  23. Park M, Cook AR, Lim J, *et al*. A Systematic review of covid-19 epidemiology based on current evidence. *J Clin Med*. 2020;9(4):967.
  24. Harapan H, Itoh N, Yufika A, *et al*. The COVID-19 pandemic calls for spatial distancing and social closeness: not for social distancing! *J Infect Public Health*. 2020;13(5):667-673.
  25. Lin C, Ye R, Xia YL. A meta-analysis to evaluate the effectiveness of real-time PCR for diagnosing novel coronavirus infections. *Genet Mol Res*. 2015;14(4):15634-15641.
  26. Viner RM, Russell S, Croker H, *et al*. School closure and management practices during coronavirus outbreaks including COVID-19: a rapid systematic review. *Lancet Child Adolesc Heal*. 2020;4(5):397-404.
  27. Brooks SK, Webster RK, Smith LE, *et al*. The psychological impact of quarantine and how to reduce it: rapid review of the evidence. *Lancet*. 2020;395(10227):912-920.
  28. Webster RK, Brooks SK, Smith LE, *et al*. How to improve adherence with quarantine: Rapid review of the evidence. *medRxiv Prepr*. Published online 2020. doi:10.1101/2020.03.17.20037408
  29. Mahtani KR, Heneghan C, Aronson JK. *What is the evidence for social distancing during global pandemics? A rapid summary of current knowledge*. [Internet]. 2020. <https://www.phc.ox.ac.uk/files/covid-19-evidence-service/what-is-the-evidence-for-social-distancing-during-global-pandemics-final-1.pdf/view>
  30. Rashid H, Ridda I, King C, *et al*. Evidence compendium and advice on social distancing and other related measures for response to an influenza pandemic. *Paediatr Respir Rev*. 2015;16(2):119-126.
  31. Fong M, Gao Hi, Wong J, *et al*. Nonpharmaceutical measures for pandemic influenza in nonhealthcare settings-social distancing measures. *Emerg Infect Dis*. 2020;26(5):976-984.
  32. Ferguson N, Laydon D, Nedjati-Gilani G, *et al*. *Report 9 - Impact of non-pharmaceutical interventions (NPIs) to reduce COVID-19 mortality and healthcare demand*. [Internet]. 2020 <https://www.imperial.ac.uk/mrc-global-infectious-disease-analysis/covid-19/report-9-impact-of-npis-on-covid-19/>
  33. Lai S, Ruktanonchai NW, Zhou L, *et al*. Effect of non-pharmaceutical interventions to

- 1  
2  
3 contain COVID-19 in China. *Nature*. Published online May 4, 2020.  
4  
5 doi:10.1038/s41586-020-2293-x  
6  
7 34. Bayham J, Fenichel E. Impact of school closures for COVID-19 on the US health-care  
8 workforce and net mortality: a modelling study. *Lancet Public Heal*. 2020;5:e271-  
9 e278.  
10  
11 35. Hellewell J, Abbott S, Gimma A, *et al*. Feasibility of controlling COVID-19 outbreaks  
12 by isolation of cases and contacts. *Lancet Glob Heal*. 2020;8(4):e488-e496.  
13  
14 36. Prem K, Liu Y, Russell T, *et al*. The effect of control strategies to reduce social mixing  
15 on outcomes of the COVID-19 epidemic in Wuhan, China: a modelling study. *Lancet*  
16 *Public Heal*. 2020;5:e261-e270.  
17  
18 37. Koo JR, Cook AR, Park M, *et al*. Interventions to mitigate early spread of SARS-CoV-  
19 2 in Singapore: a modelling study. *Lancet Infect Dis*. 2020;20(6):678-688.  
20  
21 38. Tang B, Xia F, Tang S, *et al*. The effectiveness of quarantine and isolation determine  
22 the trend of the COVID-19 epidemics in the final phase of the current outbreak in  
23 China. *Int J Infect Dis*. 2020;95:288-293.  
24  
25 39. Tang B, Wang X, Li Q, *et al*. Estimation of the transmission risk of the 2019-ncov and  
26 its implication for public health interventions. *J Clin Med*. 2020;9(2):462.  
27  
28 40. Panovska-Griffiths J. Can mathematical modelling solve the current Covid-19 crisis?  
29 *BMC Public Health*. 2020;20(1):551.  
30  
31 41. Pan D, Sze S, Minhas JS, *et al*. The impact of ethnicity on clinical outcomes in  
32 COVID-19: A systematic review. *EClinicalMedicine*. 2020;23:100404.  
33  
34 42. Chu DK, Akl EA, Duda S, *et al*. Physical distancing, face masks, and eye protection to  
35 prevent person-to-person transmission of SARS-CoV-2 and COVID-19: a systematic  
36 review and meta-analysis. *Lancet*. 2020;395(10242):1973-1987.  
37  
38 43. Nussbaumer-Streit B, Mayr V, Dobrescu A, *et al*. Quarantine alone or in combination  
39 with other public health measures to control COVID-19: a rapid review. *Cochrane*  
40 *database Syst Rev*. 2020;4:CD013574.  
41  
42 44. Jefferson T, Del Mar C, Dooley L, *et al*. Physical interventions to interrupt or reduce  
43 the spread of respiratory viruses. *Cochrane database Syst Rev*. 2011;(7).  
44  
45 doi:10.1002/14651858.CD006207.pub4  
46  
47 45. University of Michigan. *Michigan Medicine projections show aggressive social*  
48 *distancing will dramatically reduce the peak number of hospitalized COVID-19*  
49 *patients*. [Internet]. 2020 [https://www.uofmhealth.org/news/archive/202003/michigan-](https://www.uofmhealth.org/news/archive/202003/michigan-medicine-projections-show-aggressive-social)  
50 [medicine-projections-show-aggressive-social](https://www.uofmhealth.org/news/archive/202003/michigan-medicine-projections-show-aggressive-social).  
51  
52  
53  
54  
55  
56  
57  
58  
59  
60

- 1
- 2
- 3
- 4 46. Shamseer L, Moher D, Clarke M, *et al.* Preferred reporting items for systematic review
- 5 and meta-analysis protocols (PRISMA-P) 2015: elaboration and explanation. *BMJ*.
- 6 2015;349(jan02 1):g7647-g7647.
- 7
- 8 47. Higgins JPT, Thomas J, Chandler J, *et al.* *Cochrane handbook for systematic reviews*
- 9 *of interventions*. Chichester, West Sussex: John Wiley & Sons; 2019.
- 10
- 11 48. Katcher BS. *Medline: a guide to effective searching in pubmed & other interfaces*. San
- 12 Francisco, CA: Ashbury Press; 2006.
- 13
- 14 49. Moher D, Liberati A, Tetzlaff J, Altman DG. Preferred reporting items for systematic
- 15 reviews and meta-analyses: The PRISMA statement. *BMJ*. 2009;339(7716):332-336.
- 16 doi:10.1136/bmj.b2535
- 17
- 18 50. Wells G, Shea B, O'Connell D, *et al.* *The Newcastle-Ottawa Scale (NOS) for assessing*
- 19 *the quality of nonrandomised studies in meta-analyses*. [Internet]. 2019
- 20 [http://www.ohri.ca/programs/clinical\\_epidemiology/oxford.asp](http://www.ohri.ca/programs/clinical_epidemiology/oxford.asp)
- 21
- 22 51. Khan SK, ter Riet G, Popay J, *et al.* Stage II Conducting the review: phase 5: study
- 23 quality assessment. In: Khan SK, ter Riet G, Glanville J, *et al.*, eds. *Undertaking*
- 24 *systematic reviews of research on effectiveness. CRD's guidance for carrying out or*
- 25 *commissioning reviews*. CRD Report No 4. 2nd ed. York: University of York, 2000
- 26
- 27 52. Guyatt GH, Oxman AD, Vist GE, *et al.* GRADE: an emerging consensus on rating
- 28 quality of evidence and strength of recommendations. *BMJ*. 2008;336(7650):924-926.
- 29
- 30 53. Borenstein M. *Common mistakes in meta-analysis and how to avoid them*. USA:
- 31 Biostat, Inc; 2019.
- 32
- 33 54. Sterne J, Egger M, Moher D. *Addressing Reporting Biases*. Wiley; 2008.
- 34
- 35 55. Egger M, Smith GD, Schneider M, Minder C. Bias in meta-analysis detected by a
- 36 simple, graphical test. *BMJ*. 1997;315(7109):629-634.
- 37
- 38 56. Peters JL, Sutton AJ, Jones DR, *et al.* Assessing publication bias in meta-analyses in
- 39 the presence of between-study heterogeneity. *J R Stat Soc Ser A (Statistics Soc)*.
- 40 2010;173(3):575-591.
- 41
- 42 57. Jackson D. The implications of publication bias for meta-analysis' other parameter.
- 43 *Stat Med*. 2006;25(17):2911-2921.
- 44
- 45 58. Peters JL, Sutton AJ, Jones DR *et al.* Performance of the trim and fill method in the
- 46 presence of publication bias and between-study heterogeneity. *Stat Med*.
- 47 2007;26(25):4544-4562.
- 48
- 49 59. Terrin N, Schmid CH, Lau J, Olkin I. Adjusting for publication bias in the presence of
- 50 heterogeneity. *Stat Med*. 2003;22(13):2113-2126.
- 51
- 52
- 53
- 54
- 55
- 56
- 57
- 58
- 59
- 60



- 1  
2  
3  
4  
5  
6  
7  
8  
9  
10  
11  
12  
13  
14  
15  
16  
17  
18  
19  
20  
21  
22  
23  
24  
25  
26  
27  
28  
29  
30  
31  
32  
33  
34  
35  
36  
37  
38  
39  
40  
41  
42  
43  
44  
45  
46  
47  
48  
49  
50  
51  
52  
53  
54  
55  
56  
57  
58  
59  
60
60. Borenstein M, Hedges L, Higgins J, *et al.* *Introduction to meta-analysis*. Chichester, West Sussex: John Wiley & Sons; 2009.
  61. Joanna Briggs Institute. *The Joanna Briggs Institute Reviewers' manual 2014: methodology for JBI mixed methods systematic reviews*. Adelaide, Australia: Joanna Briggs Institute; 2014.
  62. Higgins J, Deeks J. Chapter 7: Selecting Studies and Collecting Data. In: Higgins J, Greens S, eds. *Cochrane handbook for systematic reviews of interventions*. Chichester, West Sussex: John Wiley & Sons; 2008.
  63. Rodgers M, Sowden A, Petticrew M, *et al.* Testing methodological guidance on the conduct of narrative synthesis in systematic reviews. *Evaluation*. 2009;15(1):49-73.
  64. Pollock AM, Roderick P, Cheng KK, Pankhania B. Covid-19: why is the UK government ignoring WHO's advice? *BMJ*. 2020;368:m1284.
  65. Regmi K, Gilbert R, Thunhurst C. How can health systems be strengthened to control and prevent an Ebola outbreak? A narrative review. *Infect Ecol Epidemiol*. 2015;5(1):28877.



**Supplementary file 1. PRISMA-P (Preferred Reporting Items for Systematic review and Meta-Analysis Protocols) 2015 checklist: recommended items to address in a systematic review protocol\***

**Impact of non-pharmaceutical interventions for reducing transmission of coronavirus disease 2019 [COVID-19]: A systematic review and meta-analysis protocol**

| Section and topic                 | Item No | Checklist item                                                                                                                                                                                                                | Page number |
|-----------------------------------|---------|-------------------------------------------------------------------------------------------------------------------------------------------------------------------------------------------------------------------------------|-------------|
| <b>ADMINISTRATIVE INFORMATION</b> |         |                                                                                                                                                                                                                               |             |
| Title:                            |         |                                                                                                                                                                                                                               |             |
| Identification                    | 1a      | Identify the report as a protocol of a systematic review                                                                                                                                                                      | 1           |
| Update                            | 1b      | If the protocol is for an update of a previous systematic review, identify as such                                                                                                                                            | N/A         |
| Registration                      | 2       | If registered, provide the name of the registry (such as PROSPERO) and registration number                                                                                                                                    | 3           |
| Authors:                          |         |                                                                                                                                                                                                                               |             |
| Contact                           | 3a      | Provide name, institutional affiliation, e-mail address of all protocol authors; provide physical mailing address of corresponding author                                                                                     | 1           |
| Contributions                     | 3b      | Describe contributions of protocol authors and identify the guarantor of the review                                                                                                                                           | 15          |
| Amendments                        | 4       | If the protocol represents an amendment of a previously completed or published protocol, identify as such and list changes; otherwise, state plan for documenting important protocol amendments                               | N/A         |
| Support:                          |         |                                                                                                                                                                                                                               |             |
| Sources                           | 5a      | Indicate sources of financial or other support for the review                                                                                                                                                                 | 15          |
| Sponsor                           | 5b      | Provide name for the review funder and/or sponsor                                                                                                                                                                             | N/A         |
| Role of sponsor or funder         | 5c      | Describe roles of funder(s), sponsor(s), and/or institution(s), if any, in developing the protocol                                                                                                                            | N/A         |
| <b>INTRODUCTION</b>               |         |                                                                                                                                                                                                                               |             |
| Rationale                         | 6       | Describe the rationale for the review in the context of what is already known                                                                                                                                                 | 3-6         |
| Objectives                        | 7       | Provide an explicit statement of the question(s) the review will address with reference to participants, interventions, comparators, and outcomes (PICO)                                                                      | 6-7         |
| <b>METHODS</b>                    |         |                                                                                                                                                                                                                               |             |
| Eligibility criteria              | 8       | Specify the study characteristics (such as PICO, study design, setting, time frame) and report characteristics (such as years considered, language, publication status) to be used as criteria for eligibility for the review | 6-7         |
| Information sources               | 9       | Describe all intended information sources (such as electronic databases, contact with study authors, trial registers or other grey literature sources) with planned dates of coverage                                         | 7           |

|                                    |     |                                                                                                                                                                                                                                                  |       |
|------------------------------------|-----|--------------------------------------------------------------------------------------------------------------------------------------------------------------------------------------------------------------------------------------------------|-------|
| Search strategy                    | 10  | Present draft of search strategy to be used for at least one electronic database, including planned limits, such that it could be repeated                                                                                                       | 9     |
| Study records:                     |     |                                                                                                                                                                                                                                                  |       |
| Data management                    | 11a | Describe the mechanism(s) that will be used to manage records and data throughout the review                                                                                                                                                     | 13    |
| Selection process                  | 11b | State the process that will be used for selecting studies (such as two independent reviewers) through each phase of the review (that is, screening, eligibility and inclusion in meta-analysis)                                                  | 10    |
| Data collection process            | 11c | Describe planned method of extracting data from reports (such as piloting forms, done independently, in duplicate), any processes for obtaining and confirming data from investigators                                                           | 12-13 |
| Data items                         | 12  | List and define all variables for which data will be sought (such as PICO items, funding sources), any pre-planned data assumptions and simplifications                                                                                          | 13    |
| Outcomes and prioritization        | 13  | List and define all outcomes for which data will be sought, including prioritization of main and additional outcomes, with rationale                                                                                                             | 7     |
| Risk of bias in individual studies | 14  | Describe anticipated methods for assessing risk of bias of individual studies, including whether this will be done at the outcome or study level, or both; state how this information will be used in data synthesis                             | 10-11 |
| Data synthesis                     | 15a | Describe criteria under which study data will be quantitatively synthesised                                                                                                                                                                      | 12    |
|                                    | 15b | If data are appropriate for quantitative synthesis, describe planned summary measures, methods of handling data and methods of combining data from studies, including any planned exploration of consistency (such as $I^2$ , Kendall's $\tau$ ) | 12    |
|                                    | 15c | Describe any proposed additional analyses (such as sensitivity or subgroup analyses, meta-regression)                                                                                                                                            | 14    |
|                                    | 15d | If quantitative synthesis is not appropriate, describe the type of summary planned                                                                                                                                                               | 13    |
| Meta-bias(es)                      | 16  | Specify any planned assessment of meta-bias(es) (such as publication bias across studies, selective reporting within studies)                                                                                                                    | 11    |
| Confidence in cumulative evidence  | 17  | Describe how the strength of the body of evidence will be assessed (such as GRADE)                                                                                                                                                               | 11    |

**\* It is strongly recommended that this checklist be read in conjunction with the PRISMA-P Explanation and Elaboration (cite when available) for important clarification on the items. Amendments to a review protocol should be tracked and dated. The copyright for PRISMA-P (including checklist) is held by the PRISMA-P Group and is distributed under a Creative Commons Attribution Licence 4.0.**

*From: Shamseer L, Moher D, Clarke M, Ghersi D, Liberati A, Petticrew M, Shekelle P, Stewart L, PRISMA-P Group. Preferred reporting items for systematic review and meta-analysis protocols (PRISMA-P) 2015: elaboration and explanation. BMJ. 2015 Jan 2;349(jan02 1):g7647.*
